# Supplementary material for: Synthesis and antitumor activity of novel 2-substituted indoline imidazolium salt derivatives
Source: Royal Society of Chemistry journal article supplement (doi:10.1039/c4ob02385d), 2014-11-24

## Electronic supplementary information (ESI)

# Synthesis and antitumor activity of novel 2-substituted indoline imidazolium salt derivatives

Xiao-Liang Xu <sup>a</sup>, Chun-Lei Yu <sup>b</sup>, Wen Chen <sup>a</sup>, Ying-Chao Li <sup>a</sup>, Li-Juan Yang <sup>c</sup>,  
Yan Li <sup>b,\*</sup>, Hong-Bin Zhang <sup>a,\*</sup>, Xiao-Dong Yang <sup>a,\*</sup>

<sup>a</sup> Key Laboratory of Medicinal Chemistry for Natural Resource (Yunnan University),  
Ministry of Education, School of Chemical Science and Technology, Yunnan University,  
Kunming, 650091, P. R. China

<sup>b</sup> State Key Laboratory for Phytochemistry and Plant Resources in West China,  
Kunming Institute of Botany, Chinese Academy of Science, Kunming, 650204, P. R.  
China

<sup>c</sup> Key Laboratory of Ethnic Medicine Resource Chemistry, State Ethnic Affairs Commission &  
Ministry of Education, Yunnan Minzu University, Kunming, 650500, P. R. China

## TABLE OF CONTENTS

|                                                                              |         |
|------------------------------------------------------------------------------|---------|
| 1. General Experimental.....                                                 | S2      |
| 2. Experimental Procedures and Analytical Data.....                          | S3-S24  |
| 3. X-ray Crystal Structure of Compound <b>24</b> .....                       | S25-S42 |
| 4. Biological Assay Procedures and Results.....                              | S43-S44 |
| 5. Cell Apoptosis and Cell Cycle Analysis.....                               | S45-S46 |
| 6. <sup>1</sup> H-NMR and <sup>13</sup> C-NMR Spectral of New Compounds..... | S47-S76 |

---

\* Corresponding author. Tel.: +86-871-65031119; fax.: +86-871-65035538. E-mail: xdyang@ynu.edu.cn, zhanghbyd@gmail.com, liyanb@mail.kib.ac.cn

## 1. General Experimental

Melting points were obtained on a XT-4 melting-point apparatus and were uncorrected. Proton nuclear magnetic resonance ( $^1\text{H-NMR}$ ) spectra were recorded on a BrukerAvance 300 spectrometer at 300 MHz. Carbon-13 nuclear magnetic resonance ( $^{13}\text{C-NMR}$ ) was recorded on BrukerAvance 300 spectrometer at 75 MHz. Chemical shifts are reported as  $\delta$  values in parts per million (ppm) relative to tetramethylsilane (TMS) for all recorded NMR spectra. Low-resolution Mass spectra were recorded on a VG Auto Spec-3000 magnetic sector MS spectrometer. High Resolution Mass spectra were taken on AB QSTAR Pulsar mass spectrometer.

Silica gel (200–300 mesh) for column chromatography and silica GF<sub>254</sub> for TLC were produced by Qingdao Marine Chemical Company (China). All air- or moisture-sensitive reactions were conducted under an argon atmosphere. Starting materials and reagents used in reactions were obtained commercially from Acros, Aldrich, Fluka and were used without purification, unless otherwise indicated.

## 2. Experimental Procedures and Analytical Data

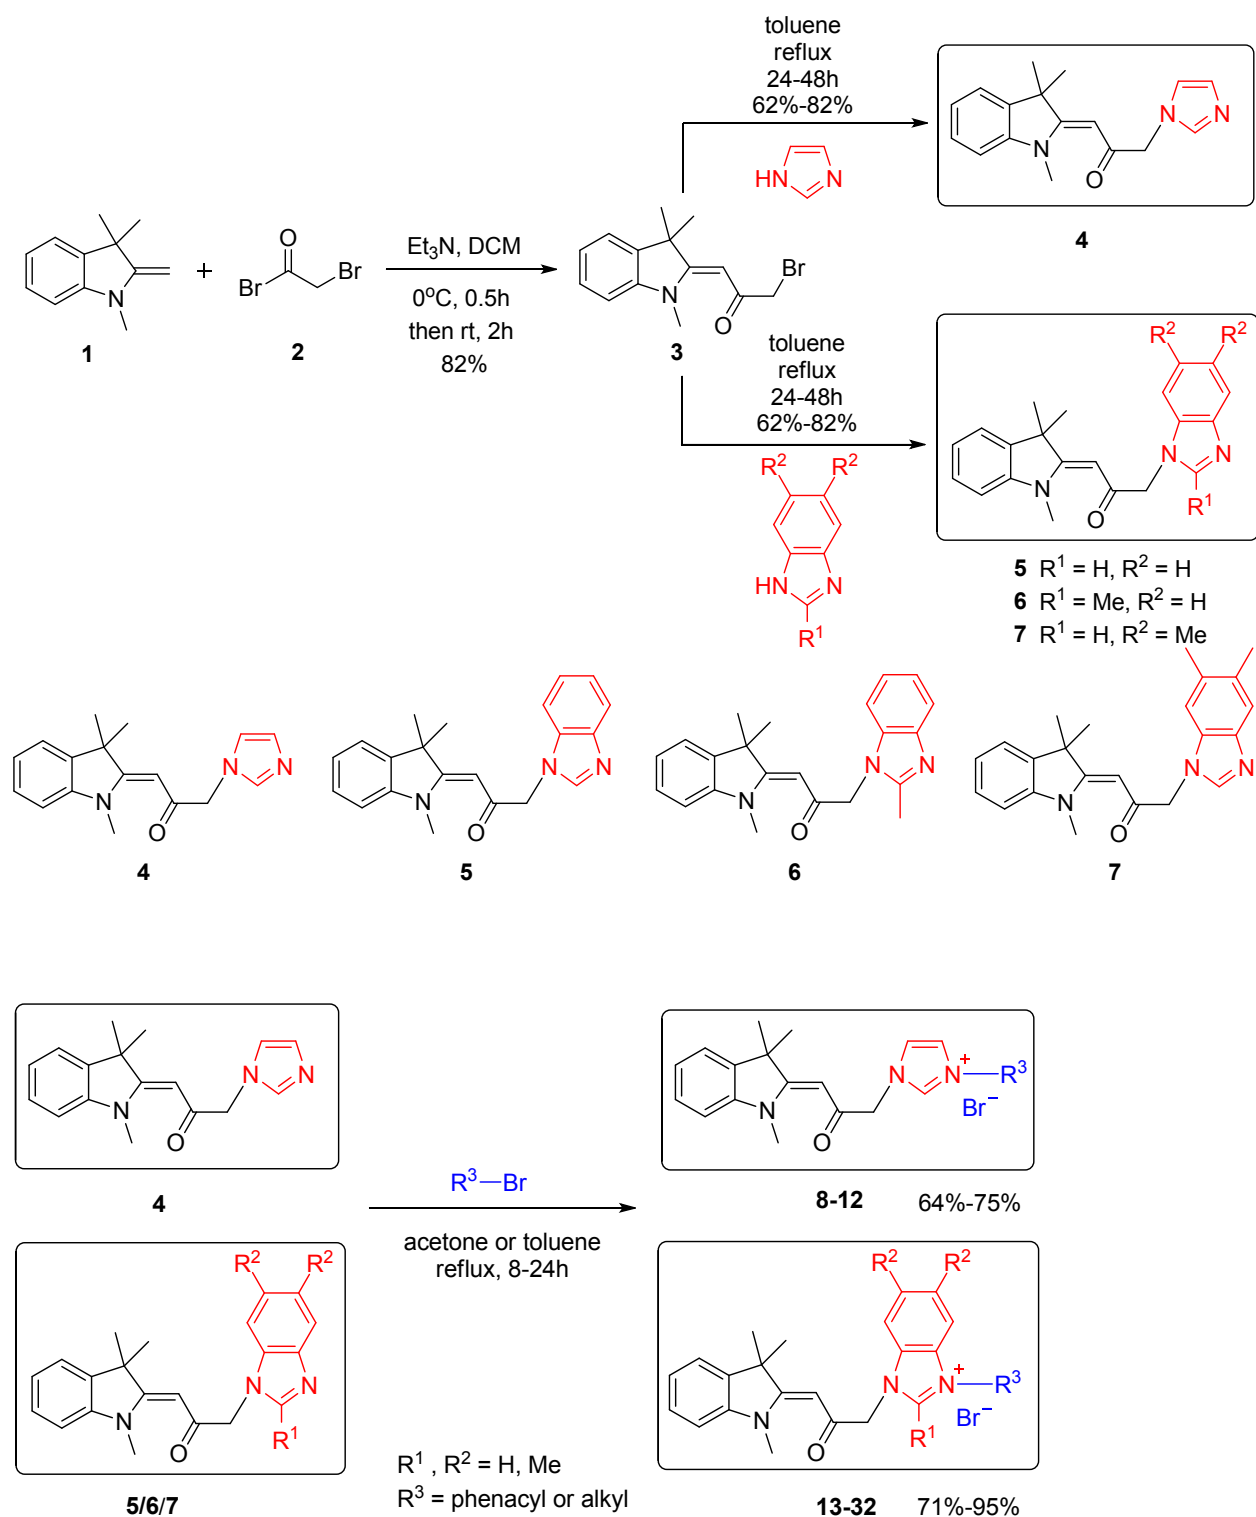

Synthesis of hybrid compounds 4-32.

| Entry | Compound No. | imidazole ring             | R <sup>3</sup>    | molecular formula                                                             | mp (°C) | Yields (%) |
|-------|--------------|----------------------------|-------------------|-------------------------------------------------------------------------------|---------|------------|
| 1     | <b>4</b>     | imidazole                  | –                 | C <sub>17</sub> H <sub>19</sub> N <sub>3</sub> O                              | 134-136 | 62         |
| 2     | <b>5</b>     | benzimidazole              | –                 | C <sub>21</sub> H <sub>21</sub> N <sub>3</sub> O                              | 192-193 | 82         |
| 3     | <b>6</b>     | 2-methyl-benzimidazole     | –                 | C <sub>22</sub> H <sub>23</sub> N <sub>3</sub> O                              | 142-144 | 80         |
| 4     | <b>7</b>     | 5,6-dimethyl-benzimidazole | –                 | C <sub>23</sub> H <sub>25</sub> N <sub>3</sub> O                              | 151-153 | 66         |
| 5     | <b>8</b>     | imidazole                  | 2-bromobenzyl     | C <sub>24</sub> H <sub>25</sub> Br <sub>2</sub> N <sub>3</sub> O              | 193-194 | 65         |
| 6     | <b>9</b>     | imidazole                  | phenacyl          | C <sub>25</sub> H <sub>26</sub> BrN <sub>3</sub> O <sub>2</sub>               | 282-284 | 77         |
| 7     | <b>10</b>    | imidazole                  | 4-bromophenacyl   | C <sub>25</sub> H <sub>25</sub> Br <sub>2</sub> N <sub>3</sub> O <sub>2</sub> | 163-164 | 67         |
| 8     | <b>11</b>    | imidazole                  | 4-methoxyphenacyl | C <sub>26</sub> H <sub>28</sub> BrN <sub>3</sub> O <sub>3</sub>               | 241-243 | 75         |
| 9     | <b>12</b>    | imidazole                  | naphthylacyl      | C <sub>29</sub> H <sub>28</sub> BrN <sub>3</sub> O <sub>2</sub>               | 155-156 | 73         |
| 10    | <b>13</b>    | benzimidazole              | 4-methylbenzyl    | C <sub>29</sub> H <sub>30</sub> BrN <sub>3</sub> O                            | 264-265 | 91         |
| 11    | <b>14</b>    | benzimidazole              | 2-bromobenzyl     | C <sub>28</sub> H <sub>27</sub> Br <sub>2</sub> N <sub>3</sub> O              | 275-277 | 84         |
| 12    | <b>15</b>    | benzimidazole              | 2-naphthylmethyl  | C <sub>32</sub> H <sub>30</sub> BrN <sub>3</sub> O                            | 247-248 | 85         |
| 13    | <b>16</b>    | benzimidazole              | phenacyl          | C <sub>29</sub> H <sub>28</sub> BrN <sub>3</sub> O <sub>2</sub>               | 282-284 | 77         |
| 14    | <b>17</b>    | benzimidazole              | 4-bromophenacyl   | C <sub>29</sub> H <sub>27</sub> Br <sub>2</sub> N <sub>3</sub> O <sub>2</sub> | 299-301 | 88         |
| 15    | <b>18</b>    | benzimidazole              | naphthylacyl      | C <sub>33</sub> H <sub>30</sub> BrN <sub>3</sub> O <sub>2</sub>               | 177-180 | 80         |
| 16    | <b>19</b>    | 2-methyl-benzimidazole     | 4-methylbenzyl    | C <sub>30</sub> H <sub>32</sub> BrN <sub>3</sub> O                            | 304-305 | 94         |
| 17    | <b>20</b>    | 2-methyl-benzimidazole     | 2-bromobenzyl     | C <sub>29</sub> H <sub>29</sub> Br <sub>2</sub> N <sub>3</sub> O              | 260-263 | 81         |
| 18    | <b>21</b>    | 2-methyl-benzimidazole     | 2-naphthylmethyl  | C <sub>33</sub> H <sub>32</sub> BrN <sub>3</sub> O                            | 279-281 | 91         |
| 19    | <b>22</b>    | 2-methyl-benzimidazole     | phenacyl          | C <sub>30</sub> H <sub>30</sub> BrN <sub>3</sub> O <sub>2</sub>               | 257-260 | 85         |
| 20    | <b>23</b>    | 2-methyl-benzimidazole     | 4-bromophenacyl   | C <sub>30</sub> H <sub>29</sub> Br <sub>2</sub> N <sub>3</sub> O              | 242-245 | 89         |
| 21    | <b>24</b>    | 2-methyl-benzimidazole     | 4-methoxyphenacyl | C <sub>31</sub> H <sub>32</sub> BrN <sub>3</sub> O <sub>3</sub>               | 264-266 | 90         |
| 22    | <b>25</b>    | 2-methyl-benzimidazole     | naphthylacyl      | C <sub>34</sub> H <sub>32</sub> BrN <sub>3</sub> O <sub>2</sub>               | 255-257 | 92         |
| 23    | <b>26</b>    | 5,6-dimethyl-benzimidazole | 4-methylbenzyl    | C <sub>31</sub> H <sub>34</sub> BrN <sub>3</sub> O                            | 211-214 | 91         |
| 24    | <b>27</b>    | 5,6-dimethyl-benzimidazole | 2-bromobenzyl     | C <sub>30</sub> H <sub>31</sub> Br <sub>2</sub> N <sub>3</sub> O              | 281-284 | 88         |
| 25    | <b>28</b>    | 5,6-dimethyl-benzimidazole | 2-naphthylmethyl  | C <sub>34</sub> H <sub>34</sub> BrN <sub>3</sub> O                            | 228-230 | 92         |
| 26    | <b>29</b>    | 5,6-dimethyl-benzimidazole | phenacyl          | C <sub>31</sub> H <sub>32</sub> BrN <sub>3</sub> O <sub>2</sub>               | 239-242 | 80         |
| 27    | <b>30</b>    | 5,6-dimethyl-benzimidazole | 4-bromophenacyl   | C <sub>31</sub> H <sub>31</sub> Br <sub>2</sub> N <sub>3</sub> O <sub>2</sub> | 201-202 | 95         |
| 28    | <b>31</b>    | 5,6-dimethyl-benzimidazole | 4-methoxyphenacyl | C <sub>32</sub> H <sub>34</sub> BrN <sub>3</sub> O <sub>3</sub>               | 183-185 | 71         |
| 29    | <b>32</b>    | 5,6-dimethyl-benzimidazole | naphthylacyl      | C <sub>35</sub> H <sub>34</sub> BrN <sub>3</sub> O <sub>2</sub>               | 193-195 | 82         |

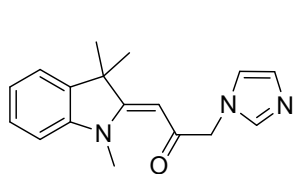

**4 (62%)**

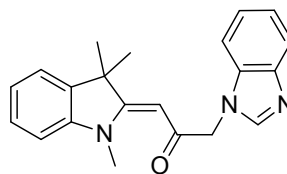

**5 (82%)**

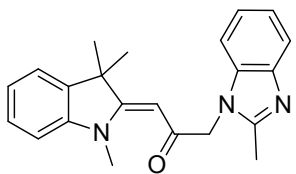

**6 (80%)**

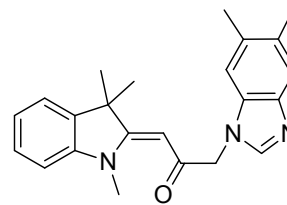

**7 (66%)**

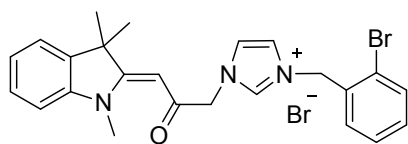

**8 (65%)**

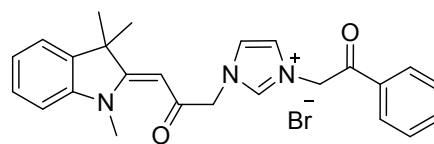

**9 (64%)**

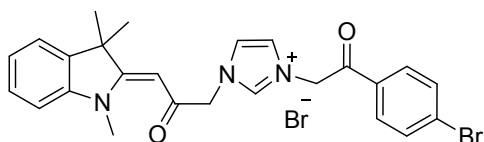

**10 (67%)**

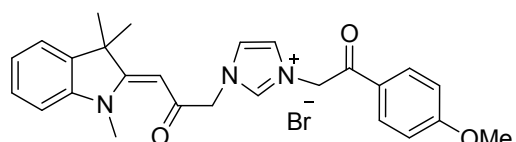

**11 (75%)**

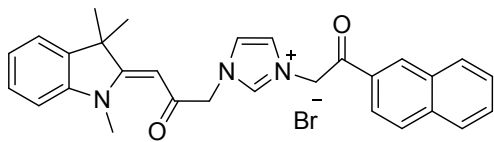

**12 (73%)**

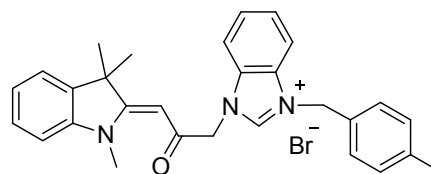

**13 (91%)**

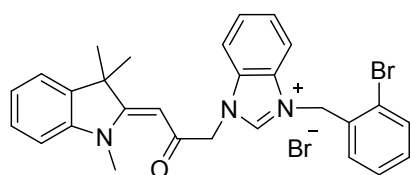

**14 (84%)**

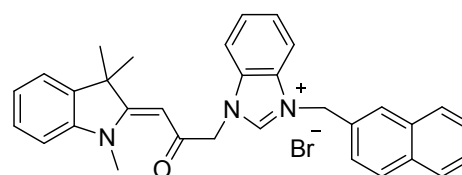

**15 (85%)**

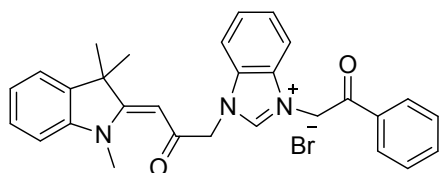

**16 (77%)**

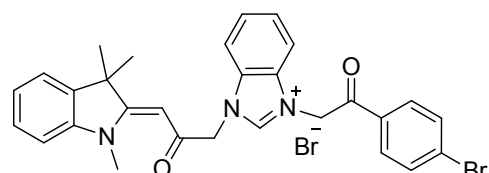

**17 (88%)**

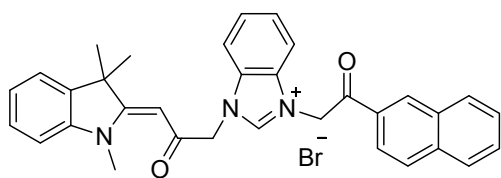

**18 (80%)**

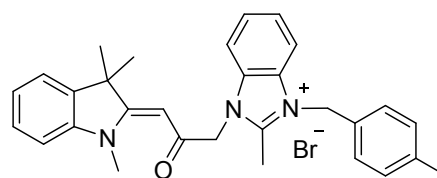

**19 (94%)**

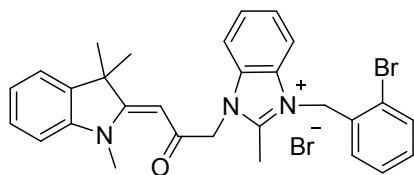

**20 (81%)**

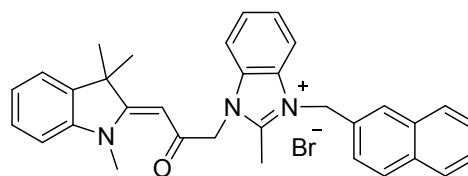

**21 (91%)**

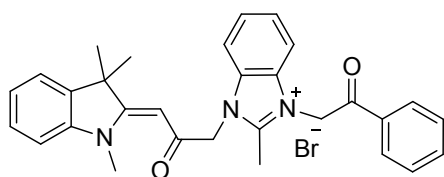

**22 (85%)**

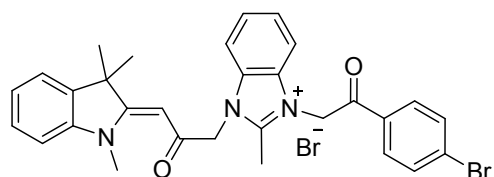

**23 (89%)**

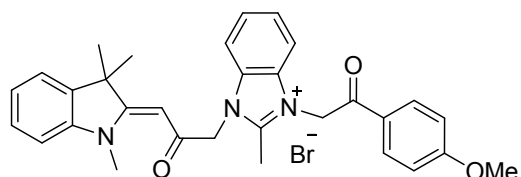

**24 (90%)**

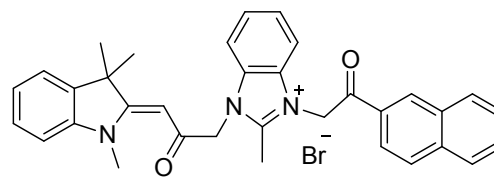

**25 (92%)**

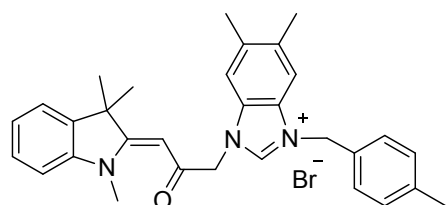

**26 (91%)**

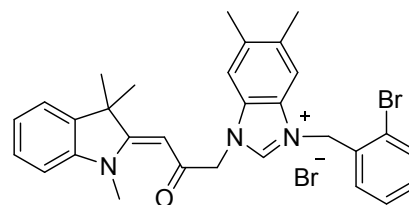

**27 (88%)**

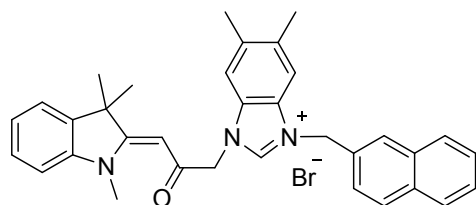

**28 (92%)**

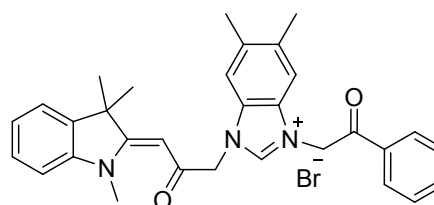

**29 (80%)**

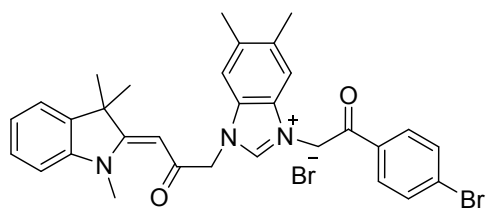

**30 (95%)**

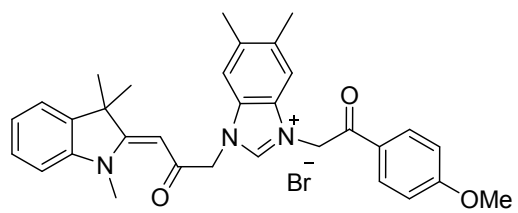

**31 (71%)**

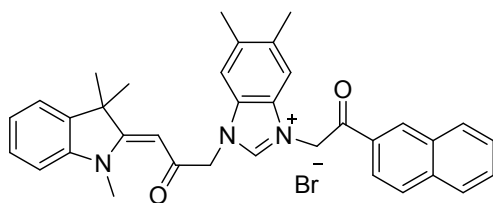

**32 (82%)**

## 2.1 Synthesis of compound 3

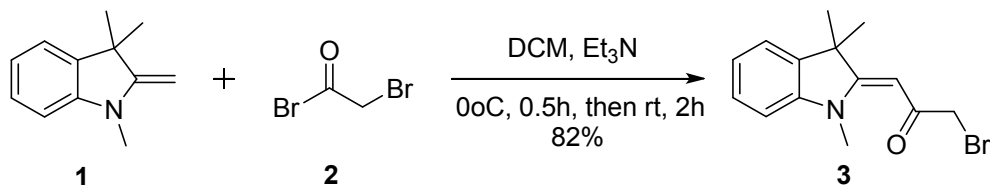

To a stirred solution of 1,3,3-trimethyl-2-methyleneindoline **1** (8.66 g, 50 mmol) and triethylamine (6.57 g, 65 mmol) in dichloromethane (300 mL) at 0 °C was added bromoacetyl bromide (12.11 g, 60 mmol) in small portions over a period of 30 minutes, and then at ambient temperature for 2 h. Reaction progress was monitored by TLC. A small amount of water was added and the mixture was stirred for 15 min. The aqueous phase was washed with CH<sub>2</sub>Cl<sub>2</sub> (4 × 50 mL). The combined organic phases were dried over Na<sub>2</sub>SO<sub>4</sub> and concentrated. The residue was purified by column chromatography on silica gel (petroleum ether : EtOAc : Et<sub>3</sub>N = 30/1/0.1 as eluant) affording the title compound **3** (11.47 g, 82%) as a red solid.

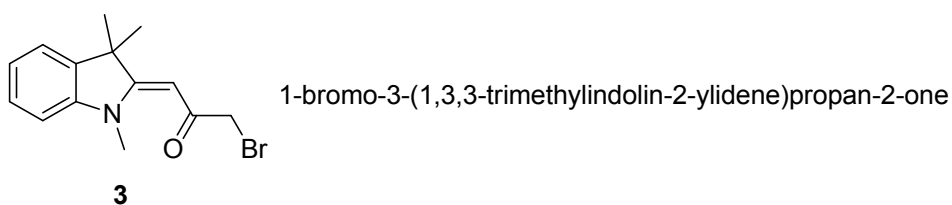

Yield 82%. Red solid. <sup>1</sup>H NMR (300 MHz, CDCl<sub>3</sub>): δ = 7.16-7.26 (2H, m), 7.02 (1H, t, J=7.2 Hz), 6.79 (1H, d, J=7.8 Hz), 5.49 (1H, s), 3.92 (2H, s), 3.27 (3H, s), 1.67 (6H, s). <sup>13</sup>C NMR (75 MHz, CDCl<sub>3</sub>): δ = 186.26, 173.58, 143.45, 140.05, 127.65, 122.86, 121.94, 108.14, 89.93, 48.61, 37.13, 30.43, 23.27.

## 2.2 Synthesis of hybrid compounds 4-7



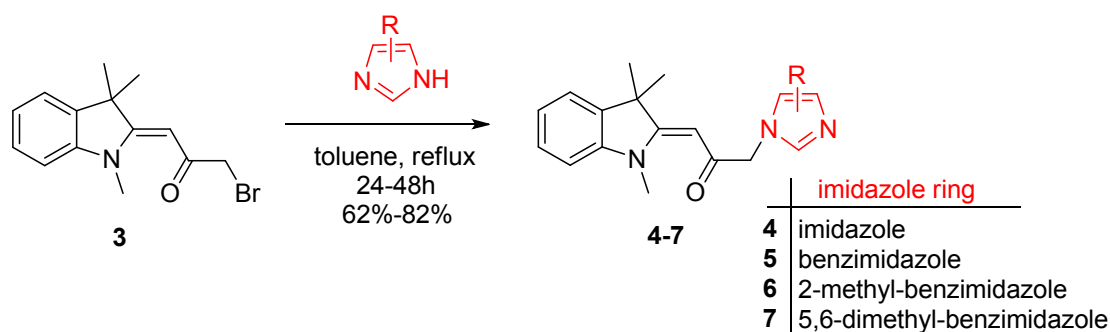

A mixture of compound **3** (2 mmol) and imidazole or substituted imidazole (6 mmol) and  $\text{K}_2\text{CO}_3$  (3 mmol) was stirred in toluene (20 ml) at reflux for 24–48 h (monitored by TLC). After cooling to room temperature, the solvent was concentrated, and the residue was diluted with EtOAc (20 mL). The organic layer was washed with water (20 mL) and brine (20 mL), dried over anhydrous  $\text{Na}_2\text{SO}_4$  and concentrated. The residue was purified by column chromatography (silica gel, petroleum ether : EtOAc:  $\text{Et}_3\text{N}$  = 1:1:0.1) to afford **4-7** in 62-82% yields as yellow powder.

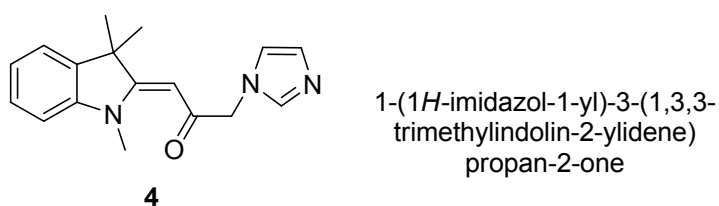

Yield 62%. Yellow solid, Mp 134-136°C. IR  $\nu_{\text{max}}$  ( $\text{cm}^{-1}$ ): 3436, 2955, 1651, 1544, 1488, 1365, 1129, 1071, 941, 742.  $^1\text{H}$  NMR (300 MHz,  $\text{CDCl}_3$ ):  $\delta$  = 7.51 (1H, s), 7.21-7.16 (2H, m), 7.14 (1H, s), 7.02 (1H, d,  $J$  = 7.5 Hz), 6.96 (1H, s), 6.76 (1H, d,  $J$  = 7.8 Hz), 4.91 (1H, s), 4.65 (2H, s), 3.06 (3H, s), 1.69 (6H, s).  $^{13}\text{C}$  NMR (75 MHz,  $\text{CDCl}_3$ ):  $\delta$  = 187.24, 174.02, 143.09, 140.16, 138.22, 129.64, 127.65, 123.03, 121.97, 120.26, 108.15, 88.21, 56.21, 48.78, 29.66, 22.91. HRMS (ESI-TOF)  $m/z$  Calcd for  $\text{C}_{17}\text{H}_{20}\text{N}_3\text{O}^+$   $[\text{M}+1]^+$ , 282.1606, found, 282.1600.

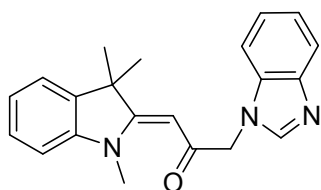

1-(1*H*-benzo[*d*]imidazol-1-yl)-3-(1,3,3-trimethylindolin-2-ylidene)propan-2-one

**5**

Yield 82%. Yellow solid, Mp 192-193°C. IR  $\nu_{\max}$  (cm<sup>-1</sup>): 3439, 2913, 2351, 1679, 1539, 1486, 1360, 1119, 934, 750. <sup>1</sup>H NMR (300 MHz, CDCl<sub>3</sub>):  $\delta$  = 8.02 (1H, s), 7.89-7.87 (1H, m), 7.44-7.41 (1H, m), 7.35-7.32 (2H, m), 7.26-7.20 (2H, m), 7.06 (1H, t, J= 7.2 Hz), 6.77 (1H, d, J= 7.5 Hz), 5.02 (1H, s), 4.93 (2H, s), 3.00 (3H, s), 1.75 (6H, s). <sup>13</sup>C NMR (75 MHz, CDCl<sub>3</sub>):  $\delta$  = 186.79, 173.99, 143.91, 143.05, 140.14, 134.39, 127.65, 123.19, 123.05, 122.26, 121.98, 120.49, 109.94, 108.15, 88.32, 54.26, 48.82, 29.61, 27.0, 22.91. HRMS (ESI-TOF)  $m/z$  Calcd for C<sub>21</sub>H<sub>22</sub>N<sub>3</sub>O<sup>+</sup> [M+1]<sup>+</sup> 332.1763, found 332.1753.

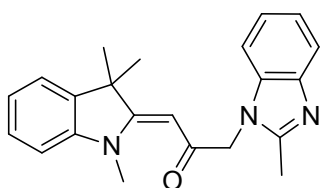

1-(2-methyl-1*H*-benzo[*d*]imidazol-1-yl)-3-(1,3,3-trimethylindolin-2-ylidene)propan-2-one

**6**

Yield 80%. Yellow solid. Mp 151-153°C. IR  $\nu_{\max}$  (cm<sup>-1</sup>): 3459, 2925, 1651, 1539, 1464, 1366, 1129, 937, 744. <sup>1</sup>H NMR (300 MHz, CDCl<sub>3</sub>):  $\delta$  = 7.72 (1H, t, J= 3.6 Hz), 7.27-7.21 (m, 3H), 7.16 (2H, d, J= 8.1 Hz), 7.01 (1H, t, J= 7.2 Hz), 6.71 (1H, d, J= 7.8 Hz), 4.87 (1H, s), 4.77 (2H, s), 2.89 (3H, s), 2.58 (3H, s), 1.70 (6H, s). <sup>13</sup>C NMR (75 MHz, CDCl<sub>3</sub>):  $\delta$  = 187.12, 173.94, 152.27, 143.04, 142.78, 140.10, 135.69, 127.63, 123.00, 122.28, 122.01, 121.95, 119.23, 109.21, 108.12, 88.08, 53.15, 48.76, 29.53, 22.95, 14.04. HRMS (ESI-TOF)  $m/z$  Calcd for C<sub>22</sub>H<sub>24</sub>N<sub>3</sub>O<sup>+</sup> [M+1]<sup>+</sup> 346.1919, found 346.1911.

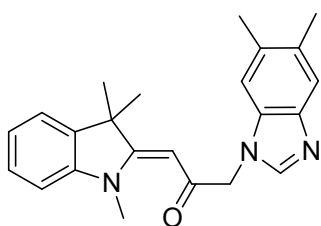

1-(5,6-dimethyl-1*H*-benzo[*d*]imidazol-1-yl)-3-(1,3,3-trimethylindolin-2-ylidene)propan-2-one

**7**

Yield 66%. Yellow solid. Mp 142-144°C. IR  $\nu_{\max}$  (cm<sup>-1</sup>): 3457, 2921, 1659, 1542, 1490, 1364, 1126, 940, 839, 745. <sup>1</sup>H NMR (300 MHz, CDCl<sub>3</sub>):  $\delta$  = 7.85 (1H, s), 7.57 (1H, s), 7.14 (3H, t, J= 7.8 Hz), 7.00 (1H, t, J= 7.5 Hz), 6.72 (1H, d, J= 7.8 Hz), 4.94 (1H, s), 4.81 (2H, s), 2.94 (3H, s), 2.35 (6H, d, J= 1.5 Hz), 1.70 (6H, s). <sup>13</sup>C NMR (75 MHz, CDCl<sub>3</sub>):  $\delta$  = 187.39, 173.94, 143.07, 142.38, 140.19, 132.93, 132.42, 131.17, 127.64, 123.00, 121.98, 120.43, 110.10, 108.12, 88.33, 54.40, 48.80, 29.62, 22.96, 20.64, 20.32. HRMS (ESI-TOF)  $m/z$  Calcd for C<sub>23</sub>H<sub>26</sub>N<sub>3</sub>O<sup>+</sup> [M+1]<sup>+</sup> 360.2076. found 360.2068.

### 2.3 Synthesis of compounds 8-32

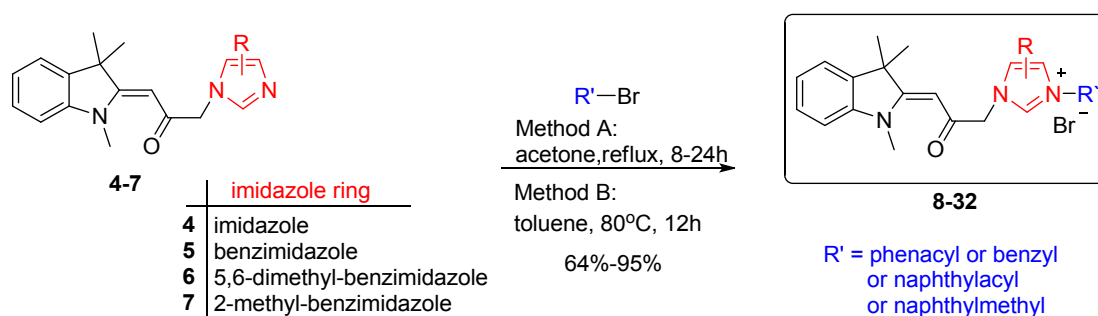

A mixture of substituted imidazole 4-7 (0.25 mmol) and phenacylbromides or phenacyl or benzyl or naphthylacyl or naphthylmethyl (0.75 mmol) was stirred in acetone (10 ml) at reflux 8-24h or toluene (10 ml) at 80°C for 12 h. An insoluble substance was formed. After completion of the reaction as indicated by TLC, the precipitate was filtered and washed with toluene (3 × 10 ml), then dried to afford imidazolium salts 8-32 in 64–95% yields.

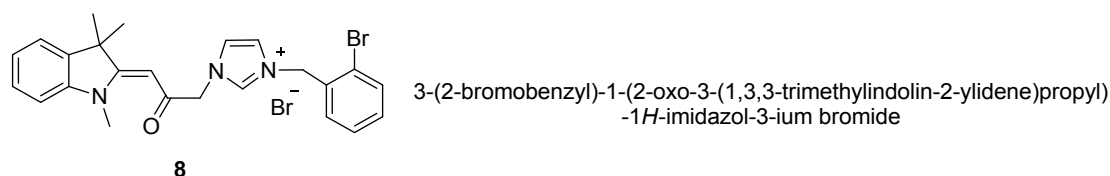

Yield 65%. White solid, Mp 193-194°C. IR  $\nu_{\max}$  (cm<sup>-1</sup>): 3427, 2968, 1649, 1545, 1479, 1366, 1132, 936, 749. <sup>1</sup>H NMR (300 MHz, DMSO-d<sub>6</sub>):  $\delta$  = 9.27 (1H, s), 7.81-7.73 (3H, m), 7.48 (1H, d, J= 6.6 Hz), 7.40 (2H, d, J= 7.2 Hz), 7.31 (1H, d, J= 6.6 Hz), 7.23 (1H,

d, J= 6.9 Hz), 7.09 (1H, d, J= 7.2 Hz), 7.03 (1H, d, J= 6.9 Hz), 5.62 (2H, s), 5.49 (1H, s), 5.28 (2H, s), 3.30 (3H, s), 1.61 (6H, s). <sup>13</sup>C NMR (75 MHz, DMSO-d<sub>6</sub>): δ = 183.69, 172.36, 142.93, 139.23, 137.74, 133.66, 133.10, 130.98, 130.59, 128.47, 127.64, 124.21, 123.03, 122.58, 122.04, 121.68, 108.86, 88.80, 57.20, 52.15, 47.89, 29.80, 22.49. HRMS (ESI-TOF) *m/z* Calcd for C<sub>24</sub>H<sub>25</sub>BrN<sub>3</sub>O<sup>+</sup> [M-Br]<sup>+</sup> 450.1175, found 450.1171.

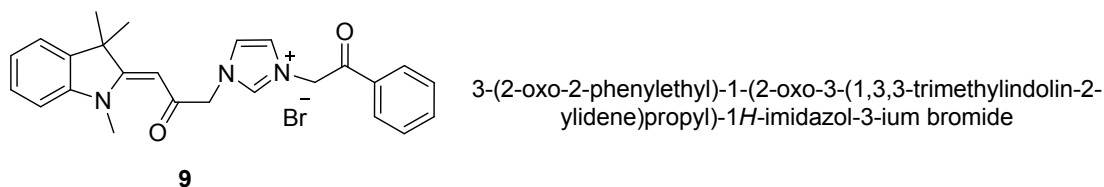

Yield 64%. White solid, Mp 237-238°C. IR  $\nu_{\max}$  (cm<sup>-1</sup>): 3437, 1697, 1646, 1532, 1372, 1131, 931, 753, 622. <sup>1</sup>H NMR (300 MHz, DMSO-d<sub>6</sub>): δ = 9.09 (1H, s), 8.08 (2H, d, J= 7.5 Hz), 7.81-7.76 (3H, m), 7.67 (2H, t, J= 7.5 Hz), 7.33 (1H, d, J=7.8 Hz), 7.26 (1H, t, J=7.5 Hz), 7.11 (1H, d, J= 7.8 Hz), 7.04 (1H, t, J= 7.5 Hz), 6.16 (2H, s), 5.51 (1H, s), 5.35 (2H, s), 3.32 (3H, s), 1.64 (6H, s). <sup>13</sup>C NMR (75 MHz, DMSO-d<sub>6</sub>): δ = 191.34, 183.77, 172.41, 142.96, 139.27, 138.36, 134.43, 133.72, 129.04, 128.08, 127.66, 123.45, 123.32, 122.61, 121.71, 108.88, 88.78, 57.16, 55.40, 47.93, 29.77, 22.50. HRMS (ESI-TOF) *m/z* Calcd for C<sub>25</sub>H<sub>26</sub>N<sub>3</sub>O<sub>2</sub><sup>+</sup> [M-Br]<sup>+</sup>, 400.2019, found 400.2019.

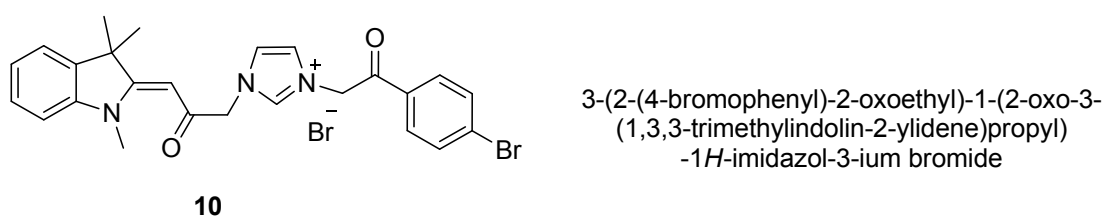

Yield 67%. Red solid, Mp 163-164°C. IR  $\nu_{\max}$  (cm<sup>-1</sup>): 3538, 3440, 3067, 2930, 1697, 1541, 1473, 1368, 1232, 1130, 1072, 935, 808, 743. <sup>1</sup>H NMR (300 MHz, CDCl<sub>3</sub>): δ = 9.64 (1H, s), 7.92 (2H, d, J= 8.1 Hz), 7.66 (1H, s), 7.58-7.52 (3H, m), 7.19 (1H, t, J= 7.5 Hz), 7.12 (1H, d, J= 6.9 Hz), 7.00 (1H, t, J= 7.2 Hz), 6.79 (1H, d, J= 7.8 Hz), 6.31 (2H, s), 5.37 (1H, s), 5.27 (2H, s), 3.24 (3H, s), 1.60 (6H, s). <sup>13</sup>C NMR (75 MHz, CDCl<sub>3</sub>): δ = 190.16, 182.60, 174.46, 142.98, 139.99, 138.26, 132.50, 130.29, 130.04, 127.79, 123.51,

123.33, 123.18, 121.91, 108.60, 89.23, 57.75, 55.92, 48.86, 46.26, 30.37, 22.79. HRMS (ESI-TOF)  $m/z$  Calcd for  $C_{25}H_{25}BrN_3O_2^+$   $[M-Br]^+ 478.1124$ , found 478.1122.

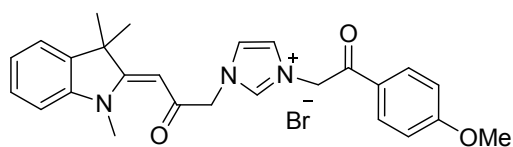

11

3-(2-(4-methoxyphenyl)-2-oxoethyl)-  
1-(2-oxo-3-(1,3,3-trimethylindolin-2-ylidene)propyl)-  
-1H-imidazol-3-ium bromide

Yield 75%. White solid, Mp 241-243°C. IR  $\nu_{max}$  ( $cm^{-1}$ ): 3434, 3068, 2943, 2350, 1682, 1600, 1538, 1474, 1372, 1243, 1144, 1022, 940, 824, 739.  $^1H$  NMR (300 MHz, DMSO- $d_6$ ):  $\delta$  = 9.05 (1H, s), 8.05 (2H, d,  $J$  = 8.7 Hz), 7.73 (2H, d,  $J$  = 6.9 Hz), 7.33 (1H, d,  $J$  = 7.2 Hz), 7.25 (1H, t,  $J$  = 7.8 Hz), 7.16 (2H, d,  $J$  = 8.7 Hz), 7.09 (1H, d,  $J$  = 7.8 Hz), 7.03 (1H, d,  $J$  = 7.5 Hz), 6.05 (2H, s), 5.48 (1H, s), 5.31 (2H, s), 3.89 (3H, s), 3.31 (3H, s), 1.63 (6H, s).  $^{13}C$  NMR (75 MHz, DMSO- $d_6$ ):  $\delta$  = 189.73, 183.93, 172.46, 164.16, 143.08, 138.46, 130.67, 127.82, 126.60, 123.47, 122.76, 121.88, 114.43, 109.04, 88.90, 57.25, 55.85, 55.15, 48.05, 29.89, 22.56. HRMS (ESI-TOF)  $m/z$  Calcd for  $C_{26}H_{28}N_3O_3^+$   $[M-Br]^+ 430.2125$ , found 430.2125.

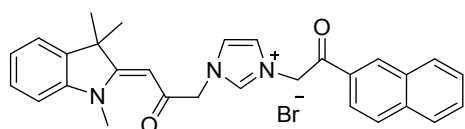

12

3-(2-(naphthalen-2-yl)-2-oxoethyl)-1-(2-oxo-3-(1,3,3-  
trimethylindolin-2-ylidene)propyl)-1H-imidazol-3-ium bromide

Yield 73%. White solid, Mp 155-156°C. IR  $\nu_{max}$  ( $cm^{-1}$ ): 3432, 3048, 2959, 1691, 1631, 1540, 1474, 1369, 1131, 932, 753.  $^1H$  NMR (300 MHz, DMSO- $d_6$ ):  $\delta$  = 9.13 (1H, s), 8.84 (1H, s), 8.21 (1H, d,  $J$  = 7.8 Hz), 8.14 (1H, d,  $J$  = 8.7 Hz), 8.07 (2H, t,  $J$  = 5.7 Hz), 7.79 (2H, s), 7.75-7.676 (2H, m), 7.33 (1H, d,  $J$  = 7.2 Hz), 7.25 (1H, t,  $J$  = 7.5 Hz), 7.10 (1H, d,  $J$  = 7.8 Hz), 7.04 (1H, t,  $J$  = 7.5 Hz), 6.27 (2H, s), 5.01 (1H, s), 5.36 (2H, s), 3.32 (3H, s), 1.65 (6H, s).  $^{13}C$  NMR (75 MHz, DMSO- $d_6$ ):  $\delta$  = 191.25, 183.79, 172.44, 142.98, 139.28, 138.43, 135.49, 132.00, 131.04, 130.40, 129.62, 129.28, 128.74, 127.84, 127.68, 127.36, 123.52, 123.38, 123.16, 122.63, 121.73, 108.89, 88.79, 57.18, 55.44,

47.95, 29.78, 22.52.HRMS (ESI-TOF)  $m/z$  Calcd for  $C_{29}H_{28}N_3O_2^+$   $[M-Br]^+$  450.2176, found 450.2172.

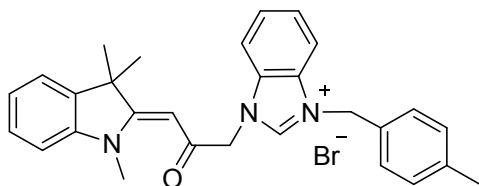

**13**

3-(4-methylbenzyl)-1-(2-oxo-3-(1,3,3-trimethylindolin-2-ylidene)propyl)-1H-benzo[d]imidazol-3-ium bromide

Yield 91%. White solid. Mp 264-265°C. IR  $\nu_{max}$  ( $cm^{-1}$ ): 3436, 2959, 1652, 1544, 1481, 1368, 1131, 934, 755.  $^1H$  NMR (300 MHz, DMSO- $d_6$ ):  $\delta$  = 9.92 (1H, s), 8.00-7.95 (2H, m), 7.66 (2H, s), 7.44 (2H, d,  $J$  = 6.9 Hz), 7.30 (2H, d,  $J$  = 6.9 Hz), 7.23 (2H, d,  $J$  = 7.2 Hz), 7.11 (1H, d,  $J$  = 7.2 Hz), 7.04 (1H, d,  $J$  = 6.6 Hz), 5.83 (2H, s), 5.68 (1H, s), 5.60 (2H, s), 3.35 (3H, s), 2.29 (3H, s), 1.58 (6H, s).  $^{13}C$  NMR (75 MHz, DMSO- $d_6$ ):  $\delta$  = 183.42, 172.65, 143.42, 142.95, 139.30, 138.21, 131.91, 130.98, 130.42, 129.54, 128.27, 127.71, 126.73, 126.52, 122.71, 121.74, 113.88, 113.65, 108.98, 89.12, 54.73, 49.66, 47.98, 29.87, 22.48, 20.67. HRMS (ESI-TOF)  $m/z$  Calcd for  $C_{29}H_{30}N_3O^+$   $[M-Br]^+$  436.2383. found 436.2384.

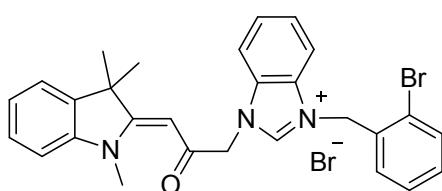

**14**

3-(2-bromobenzyl)-1-(2-oxo-3-(1,3,3-trimethylindolin-2-ylidene)propyl)-1H-benzo[d]imidazol-3-ium bromide

Yield 84%. White solid, Mp 275-277°C. IR  $\nu_{max}$  ( $cm^{-1}$ ): 3435, 2921, 1714, 1640, 1537, 1481, 1366, 1129, 934, 749.  $^1H$  NMR (300 MHz, DMSO- $d_6$ ):  $\delta$  = 9.86 (1H, s), 8.03-7.95 (2H, m), 7.77 (1H, d,  $J$  = 7.5 Hz), 7.68 (2H, t,  $J$  = 3.9 Hz), 7.49-7.37 (3H, m), 7.31 (1H, d,  $J$  = 7.2 Hz), 7.25 (1H, t,  $J$  = 7.8 Hz), 7.11 (1H, d,  $J$  = 7.8 Hz), 7.03 (1H, t,  $J$  = 7.2 Hz), 5.96 (2H, s), 5.70 (1H, s), 5.65 (2H, s), 3.35 (3H, s), 1.58 (6H, s).  $^{13}C$  NMR (75 MHz,

DMSO-d<sub>6</sub>):  $\delta$  = 183.34, 172.59, 144.02, 142.94, 139.28, 133.32, 132.65, 131.84, 131.02, 130.61, 128.44, 127.69, 126.83, 126.72, 123.12, 122.67, 121.71, 113.75, 108.96, 89.15, 54.85, 50.38, 47.96, 29.89, 22.45. HRMS (ESI-TOF)  $m/z$  Calcd for C<sub>28</sub>H<sub>27</sub>BrN<sub>3</sub>O<sup>+</sup> [M-Br]<sup>+</sup> 500.1332, found 500.1335.

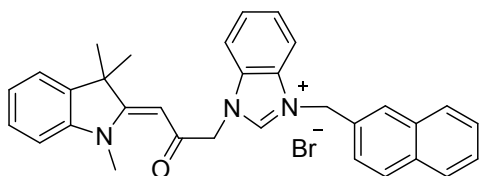

**15**

3-(naphthalen-2-ylmethyl)-  
1-(2-oxo-3-(1,3,3-trimethylindolin-2-ylidene)propyl)-  
1H-benzo[d]imidazol-3-ium bromide

Yield 85%. White solid, Mp 247-248°C. IR  $\nu_{\max}$  (cm<sup>-1</sup>): 3430, 2959, 1638, 1540, 1477, 1367, 1132, 934, 752. <sup>1</sup>H NMR (300 MHz, DMSO-d<sub>6</sub>):  $\delta$  = 10.03 (1H, s), 8.13 (1H, s), 8.07 (1H, d, J = 8.7 Hz), 8.00-7.92 (4H, m), 7.64 (3H, d), 7.56 (2H, t, J = 4.5 Hz), 7.31 (1H, d, J = 7.2 Hz), 7.25 (1H, t, J = 7.5 Hz), 7.11 (1H, d, J = 7.8 Hz), 7.03 (1H, t, J = 7.5 Hz), 6.07 (2H, s), 5.72 (1H, s), 5.65 (2H, s), 3.36 (3H, s), 1.60 (6H, s). <sup>13</sup>C NMR (75 MHz, DMSO-d<sub>6</sub>):  $\delta$  = 183.42, 172.66, 143.74, 142.94, 139.30, 132.70, 131.95, 131.47, 130.55, 128.80, 127.81, 127.67, 127.46, 126.73, 126.58, 125.56, 122.70, 121.73, 113.87, 113.70, 108.98, 89.17, 54.81, 50.02, 47.99, 29.90, 22.48. HRMS (ESI-TOF)  $m/z$  Calcd for C<sub>32</sub>H<sub>30</sub>N<sub>3</sub>O<sup>+</sup> [M-Br]<sup>+</sup> 472.2383, found 472.2484.

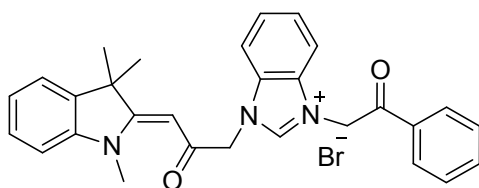

**16**

3-(2-oxo-2-phenylethyl)-1-(2-oxo-  
3-(1,3,3-trimethylindolin-2-ylidene)propyl)-  
1H-benzo[d]imidazol-3-ium bromide

Yield 77%. Yellow solid, Mp 282-284°C. IR  $\nu_{\max}$  (cm<sup>-1</sup>): 3424, 3037, 2914, 1700, 1541, 1472, 1367, 1227, 1133, 933, 752. <sup>1</sup>H NMR (300 MHz, CDCl<sub>3</sub> + DMSO-d<sub>6</sub>):  $\delta$  = 10.01 (1H, s), 8.08 (2H, d, J = 7.2 Hz), 7.84-7.78 (2H, m), 7.66 (1H, t, J = 7.2 Hz), 7.59-7.50 (4H, m), 7.17 (1H, t, J = 7.5 Hz), 7.11 (1H, d, J = 7.2 Hz), 6.97 (1H, t, J = 7.5 Hz), 6.84 (1H, d, J = 7.8 Hz), 6.42 (2H, s), 5.51 (3H, s), 3.02 (3H, s), 1.58 (6H, s). <sup>13</sup>C NMR (75

MHz, CDCl<sub>3</sub> + DMSO-d<sub>6</sub>):  $\delta$  = 189.70, 181.49, 173.51, 143.62, 142.32, 139.13, 134.18, 133.17, 131.30, 131.07, 128.54, 128.00, 127.21, 126.45, 122.64, 121.19, 113.15, 112.91, 108.09, 88.33, 54.60, 52.79, 48.11, 29.66, 22.09. HRMS (ESI-TOF)  $m/z$  Calcd for C<sub>29</sub>H<sub>28</sub>N<sub>3</sub>O<sub>2</sub><sup>+</sup> [M-Br]<sup>+</sup> 450.2176, found 450.2179.

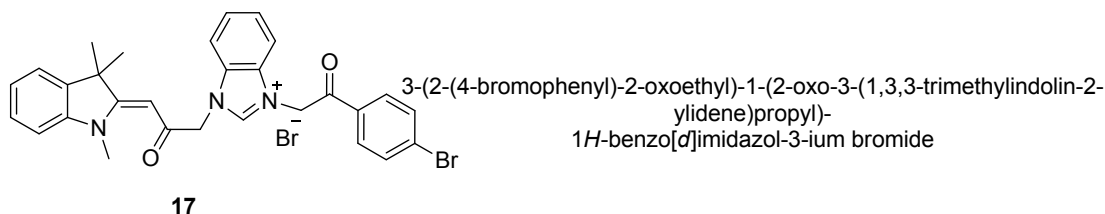

Yield 88%. White solid, Mp 299-301°C. IR  $\nu_{\max}$  (cm<sup>-1</sup>): 3434, 2973, 1698, 1544, 1481, 1364, 1225, 1131, 933, 748. <sup>1</sup>H NMR (300 MHz, DMSO-d<sub>6</sub>):  $\delta$  = 9.74 (1H, s), 8.09 (3H, d, J= 8.1 Hz), 8.02 (1H, d, J= 7.2 Hz), 7.91 (2H, d, J= 8.1 Hz), 7.69 (2H, t, J= 3.9 Hz), 7.31 (1H, d, J= 7.2 Hz), 7.25 (1H, t, J= 7.8 Hz), 7.12 (1H, d, J= 7.8 Hz), 7.03 (1H, t, J= 6.9 Hz), 6.52 (2H, s), 5.73 (2H, s), 5.71 (1H, s), 3.37 (3H, s), 1.60 (6H, s). <sup>13</sup>C NMR (75 MHz, DMSO-d<sub>6</sub>):  $\delta$  = 190.63, 183.33, 172.63, 144.31, 142.93, 139.29, 132.86, 132.08, 131.54, 131.33, 130.34, 128.61, 127.68, 126.56, 122.68, 121.70, 113.95, 113.53, 108.95, 89.16, 54.77, 53.30, 47.97, 29.87, 22.47. HRMS (ESI-TOF)  $m/z$  Calcd for C<sub>29</sub>H<sub>27</sub>BrN<sub>3</sub>O<sub>2</sub><sup>+</sup> [M-Br]<sup>+</sup> 528.1281, found 528.1282.

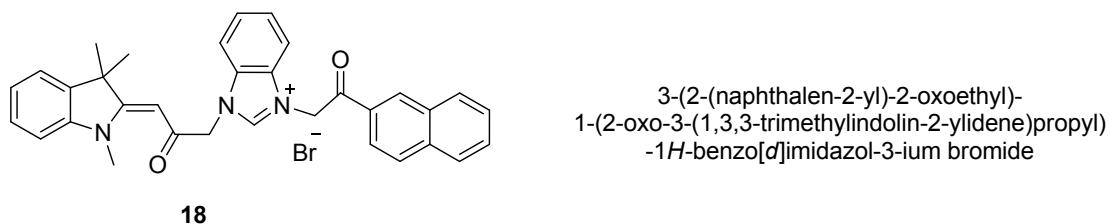

Yield 80%. Yellow solid, Mp 177-180°C. IR  $\nu_{\max}$  (cm<sup>-1</sup>): 3425, 3027, 2927, 1690, 1628, 1540, 1477, 1368, 1185, 1131, 935, 749. <sup>1</sup>H NMR (300 MHz, DMSO-d<sub>6</sub>):  $\delta$  = 9.79 (1H, s), 8.97 (1H, s), 8.25 (1H, d, J = 7.8 Hz), 8.18-8.08 (4H, m), 8.03 (1H, d, J= 7.2 Hz), 7.79-7.69 (4H, m), 7.32 (1H, d, J= 7.2 Hz), 7.26 (1H, t, J= 7.8 Hz), 7.12 (1H, d, J= 7.8 Hz), 7.04 (1H, t, J= 7.2 Hz), 6.67 (2H, s), 5.74 (2H, s), 5.71 (1H, s), 3.36 (3H, s), 1.62



(6H, s).  $^{13}\text{C}$  NMR (75 MHz, DMSO- $d_6$ ):  $\delta$  = 191.16, 183.38, 172.67, 144.46, 142.96, 139.32, 135.55, 132.02, 131.64, 131.41, 131.12, 130.86, 129.67, 129.33, 128.68, 127.87, 127.70, 127.38, 126.63, 123.35, 122.71, 121.74, 113.95, 113.57, 108.98, 89.16, 54.80, 53.34, 48.01, 29.88, 22.49. HRMS (ESI-TOF)  $m/z$  Calcd for  $\text{C}_{33}\text{H}_{30}\text{N}_3\text{O}_2^+$   $[\text{M}-\text{Br}]^+$  500.2332, found 500.2333.

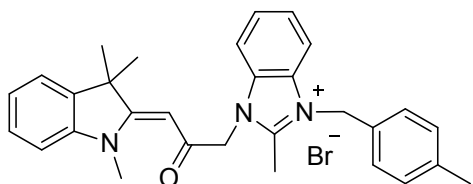

**19**

(Z)-2-methyl-3-(4-methylbenzyl)-  
1-(2-oxo-3-(1,3,3-trimethylindolin-2-ylidene)propyl)-  
1H-benzo[d]imidazol-3-ium bromide

Yield 94%. White solid, Mp 304-305°C. IR  $\nu_{\text{max}}$  ( $\text{cm}^{-1}$ ): 3434, 3021, 2921, 1650, 1536, 1473, 1367, 1131, 933, 760.  $^1\text{H}$  NMR (300 MHz, DMSO- $d_6$ ):  $\delta$  = 7.99 (2H, s), 7.63 (2H, s), 7.31-7.19 (6H, m), 7.11 (1H, d,  $J$  = 7.5 Hz), 7.03 (1H, t,  $J$  = 7.2 Hz), 5.85 (2H, s), 5.70 (1H, s), 5.63 (2H, s), 3.36 (3H, s), 2.88 (3H, s), 2.28 (3H, s), 1.59 (6H, s).  $^{13}\text{C}$  NMR (75 MHz, DMSO- $d_6$ ):  $\delta$  = 183.41, 172.72, 152.91, 142.97, 139.34, 137.87, 131.58, 131.19, 130.69, 129.59, 127.77, 127.28, 126.28, 122.78, 121.79, 113.29, 112.89, 109.04, 89.32, 53.55, 48.02, 29.90, 22.52, 20.66, 10.94. HRMS (ESI-TOF)  $m/z$  Calcd for  $\text{C}_{30}\text{H}_{32}\text{N}_3\text{O}^+$   $[\text{M}-\text{Br}]^+$  450.2539, found 450.2540.

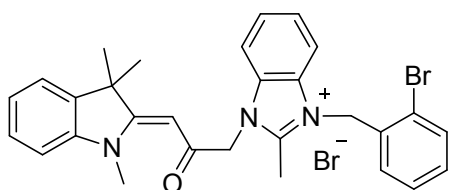

**20**

3-(2-bromobenzyl)-2-methyl-1-  
(2-oxo-3-(1,3,3-trimethylindolin-2-ylidene)propyl)-  
1H-benzo[d]imidazol-3-ium bromide

Yield 81%. Yellow solid, Mp 260-263°C. IR  $\nu_{\text{max}}$  ( $\text{cm}^{-1}$ ): 3429, 2927, 1646, 1543, 1474, 1368, 1135, 937, 758.  $^1\text{H}$  NMR (300 MHz, DMSO- $d_6$ ):  $\delta$  = 8.05 (1H, d,  $J$  = 7.2 Hz), 7.79 (2H, d,  $J$  = 6.3 Hz), 7.61 (2H, t,  $J$  = 9 Hz), 7.33-7.23 (4H, m), 7.12 (1H, d,  $J$  = 7.2 Hz),

7.04 (1H, d, J= 6.6 Hz), 6.89 (1H, s), 5.93 (2H, s), 5.74 (1H, s), 5.71 (2H, s), 3.38 (3H, s), 2.83 (3H, s), 1.58 (6H, s). <sup>13</sup>C NMR (75 MHz, DMSO-d<sub>6</sub>): δ = 183.41, 172.73, 153.78, 143.03, 139.37, 133.40, 132.97, 131.70, 130.75, 130.47, 128.48, 127.86, 126.51, 122.85, 122.00, 113.17, 109.14, 89.47, 48.82, 48.09, 30.00, 22.51, 11.10. HRMS (ESI-TOF) *m/z* Calcd for C<sub>29</sub>H<sub>29</sub>BrN<sub>3</sub>O<sup>+</sup> [M-Br]<sup>+</sup> 514.1488, found 514.1489.

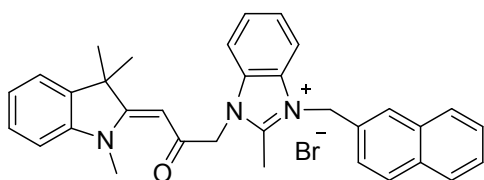

**21**

2-methyl-3-(naphthalen-2-ylmethyl)-1-(2-oxo-3-(1,3,3-trimethylindolin-2-ylidene)propyl)-1H-benzo[d]imidazol-3-ium bromide

Yield 91%. White solid. Mp 279-281°C, IR  $\nu_{\text{max}}$  (cm<sup>-1</sup>): 3432, 2928, 2352, 1644, 1539, 1474, 1370, 1133, 936, 751. <sup>1</sup>H NMR (300 MHz, DMSO-d<sub>6</sub>): δ = 7.99-7.86 (6H, m), 7.62-7.47 (5H, m), 7.31 (1H, d, J= 7.2 Hz), 7.25 (1H, t, J= 7.5 Hz), 7.12 (1H, d, J= 7.8 Hz), 7.03 (1H, t, J= 6.9 Hz), 6.09 (2H, s), 5.72 (1H, s), 5.69 (2H, s), 3.37 (3H, s), 2.93 (3H, s), 1.58 (6H, s). <sup>13</sup>C NMR (75 MHz, DMSO-d<sub>6</sub>): δ = 183.44, 172.76, 153.37, 142.99, 139.36, 132.79, 132.56, 131.78, 130.84, 128.88, 127.78, 126.78, 126.66, 126.44, 125.81, 124.92, 122.82, 121.83, 113.31, 112.99, 109.08, 89.35, 53.65, 48.31, 48.08, 29.94, 22.51, 11.06. HRMS (ESI-TOF) *m/z* Calcd for C<sub>33</sub>H<sub>32</sub>N<sub>3</sub>O<sup>+</sup> [M-Br]<sup>+</sup> 486.2539, found 486.2535.

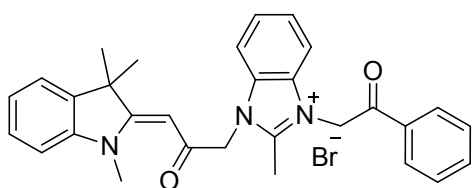

**22**

2-methyl-3-(2-oxo-2-phenylethyl)-1-(2-oxo-3-(1,3,3-trimethylindolin-2-ylidene)propyl)-1H-benzo[d]imidazol-3-ium bromide

Yield 85%. White solid, Mp 257-260°C. IR  $\nu_{\text{max}}$  (cm<sup>-1</sup>): 3440, 3027, 2888, 1694, 1648, 1536, 1478, 1367, 1228, 1130, 935, 753. <sup>1</sup>H NMR (300 MHz, DMSO-d<sub>6</sub>): δ = 8.17 (2H, d, J= 6.9 Hz), 8.02 (2H, t, J= 7.5 Hz), 7.80 (1H, d, J= 6.9 Hz), 7.71-7.63 (4H, m), 7.32 (1H, d, J= 6.9 Hz), 7.26 (1H, t, J= 7.5 Hz), 7.12 (1H, d, J= 8.1 Hz), 7.05 (1H, d, J= 6.9

Hz), 6.52 (2H, s), 5.69 (3H, s), 3.36 (3H, s), 2.78 (3H, s), 1.59 (6H, s).  $^{13}\text{C}$  NMR (75 MHz, DMSO- $d_6$ ):  $\delta$  = 191.18, 183.40, 172.79, 154.05, 139.41, 134.81, 133.83, 131.39, 129.104, 128.81, 127.88, 126.45, 122.89, 121.92, 113.30, 112.87, 109.16, 89.31, 53.60, 52.03, 48.14, 29.96, 22.55, 10.69. HRMS (ESI-TOF)  $m/z$  Calcd for  $\text{C}_{30}\text{H}_{30}\text{N}_3\text{O}_2^+$  [M-Br] $^+$  464.2332, found 464.2331.

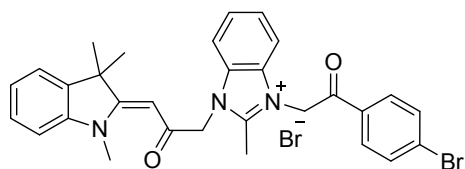

23

3-(2-(4-bromophenyl)-2-oxoethyl)-2-methyl-1-(2-oxo-3-(1,3,3-trimethylindolin-2-ylidene)propyl)-1H-benzo[d]imidazol-3-ium bromide

Yield 89%. White solid, Mp 242-245°C. IR  $\nu_{\text{max}}$  ( $\text{cm}^{-1}$ ): 3431, 3015, 1659, 1535, 1477, 1368, 1131, 935, 753.  $^1\text{H}$  NMR (300 MHz, DMSO- $d_6$ ):  $\delta$  = 8.10 (2H, d,  $J$  = 8.1 Hz), 8.02 (2H, t,  $J$  = 8.1 Hz), 7.92 (2H, d,  $J$  = 8.1 Hz), 7.63 (2H, s), 7.31 (1H, d,  $J$  = 7.2 Hz), 7.24 (1H, d,  $J$  = 7.5 Hz), 7.12 (1H, d,  $J$  = 7.8 Hz), 7.03 (1H, t,  $J$  = 7.2 Hz), 6.51 (2H, s), 5.69 (3H, s), 3.36 (3H, s), 2.79 (3H, s), 1.59 (6H, s).  $^{13}\text{C}$  NMR (75 MHz, DMSO- $d_6$ ):  $\delta$  = 190.44, 183.27, 172.72, 152.94, 142.95, 139.33, 132.85, 132.01, 131.25, 130.63, 128.75, 127.73, 126.19, 122.76, 121.76, 113.22, 112.77, 109.01, 89.23, 53.53, 51.97, 48.02, 29.86, 22.50, 10.62. HRMS (ESI-TOF)  $m/z$  Calcd for  $\text{C}_{30}\text{H}_{29}\text{BrN}_3\text{O}_2^+$  [M-Br] $^+$  542.1437, found 542.1436.

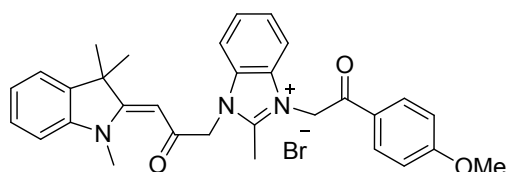

24

3-(2-(4-methoxyphenyl)-2-oxoethyl)-2-methyl-1-(2-oxo-3-(1,3,3-trimethylindolin-2-ylidene)propyl)-1H-benzo[d]imidazol-3-ium bromide

Yield 90%. White solid, Mp 264-266°C. IR  $\nu_{\text{max}}$  ( $\text{cm}^{-1}$ ): 3428, 2923, 2352, 1687, 1604, 1536, 1477, 1365, 1240, 1130, 935, 824, 758.  $^1\text{H}$  NMR (300 MHz, DMSO- $d_6$ ):  $\delta$  = 8.14 (2H, d,  $J$  = 8.7 Hz), 8.03-7.99 (2H, m), 7.67-7.59 (2H, m), 7.32 (1H, d,  $J$  = 7.2 Hz), 7.28-7.19 (3H, m), 7.12 (1H, d,  $J$  = 7.8 Hz), 7.04 (1H, t,  $J$  = 7.5 Hz), 6.47 (2H, s), 5.68 (3H, s),

3.92 (3H, s), 3.36 (3H, s), 2.77 (3H, s), 1.59 (6H, s).  $^{13}\text{C}$  NMR (75 MHz, DMSO- $d_6$ ):  $\delta$  = 189.18, 183.28, 172.69, 164.29, 153.88, 142.94, 139.31, 131.28, 131.10, 127.70, 126.61, 126.26, 126.16, 122.73, 121.74, 114.23, 113.08, 112.75, 108.99, 89.20, 55.82, 53.48, 51.50, 48.00, 29.82, 22.48, 10.58. HRMS (ESI-TOF)  $m/z$  Calcd for  $\text{C}_{31}\text{H}_{32}\text{N}_3\text{O}_3^+$  [M-Br] $^+$  494.2438, found 454.2441.

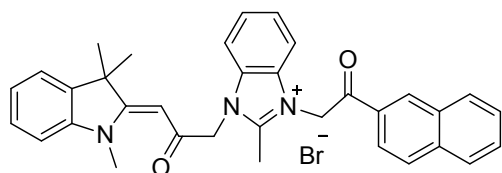

**25**

2-methyl-3-(2-(naphthalen-2-yl)-2-oxoethyl)-  
-1-(2-oxo-3-(1,3,3-trimethylindolin-2-ylidene)propyl)-  
-1H-benzo[d]imidazol-3-ium bromide

Yield 92%. White solid, Mp 255-257°C. IR  $\nu_{\text{max}}$  ( $\text{cm}^{-1}$ ): 3427, 2920, 1693, 1537, 1476, 1366, 1130, 935, 756.  $^1\text{H}$  NMR (300 MHz, DMSO- $d_6$ ):  $\delta$  = 9.01 (1H, s), 8.24 (1H, d, J= 6.9 Hz), 8.18-8.03 (4H, m), 7.77-7.64 (4H, m), 7.33 (1H, d, J= 6.9 Hz), 7.26 (1H, t, J= 7.5 Hz), 7.13 (1H, d, J= 7.5 Hz), 7.04 (1H, t, J= 6.9 Hz), 6.69 (2H, s), 5.73 (3H, s), 3.38 (3H, s), 2.84 (3H, s), 1.60 (6H, s).  $^{13}\text{C}$  NMR (75 MHz, DMSO- $d_6$ ):  $\delta$  = 191.08, 183.42, 172.73, 154.07, 143.05, 139.38, 135.68, 132.03, 131.40, 129.77, 129.51, 128.68, 128.00, 127.53, 126.31, 123.61, 122.84, 121.89, 113.29, 112.90, 109.13, 89.37, 53.62, 52.10, 48.11, 29.96, 22.54, 10.76. HRMS (ESI-TOF)  $m/z$  Calcd for  $\text{C}_{34}\text{H}_{32}\text{N}_3\text{O}_2^+$  [M-Br] $^+$  514.2489, found 514.2489.

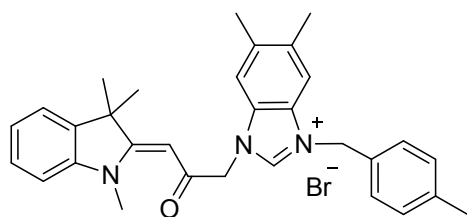

**26**

5,6-dimethyl-3-(4-methylbenzyl)-1-  
-(2-oxo-3-(1,3,3-trimethylindolin-2-ylidene)propyl)-  
-1H-benzo[d]imidazol-3-ium bromide

Yield 91%. White solid. Mp 211-214°C. IR  $\nu_{\text{max}}$  ( $\text{cm}^{-1}$ ): 3436, 2932, 1645, 1543, 1484, 1369, 1130, 931, 750.  $^1\text{H}$  NMR (300 MHz, DMSO- $d_6$ ):  $\delta$  = 9.78 (1H, s), 7.80 (1H, s), 7.75 (1H, s), 7.41 (2H, d, J= 7.1 Hz), 7.30 (1H, d, J= 6.9 Hz), 7.24 (3H, s), 7.11 (1H, d,

J= 7.8 Hz), 7.03 (1H, t, J= 7.2 Hz), 5.76 (2H, s), 5.67 (1H, s), 5.32 (2H, s), 3.37 (3H, s), 2.36 (6H, s), 2.28 (3H, s), 1.58 (6H, s). <sup>13</sup>C NMR (75 MHz, DMSO-d<sub>6</sub>): δ = 183.53, 172.59, 142.98, 142.25, 139.32, 138.12, 136.48, 136.28, 131.21, 130.40, 129.53, 128.95, 128.11, 127.72, 122.70, 121.75, 113.25, 113.08, 108.98, 89.15, 54.63, 49.45, 47.98, 29.89, 22.51, 20.69, 19.97. HRMS (ESI-TOF) *m/z* Calcd for C<sub>31</sub>H<sub>34</sub>N<sub>3</sub>O<sup>+</sup> [M-Br]<sup>+</sup> 464.2696, found 464.2699.

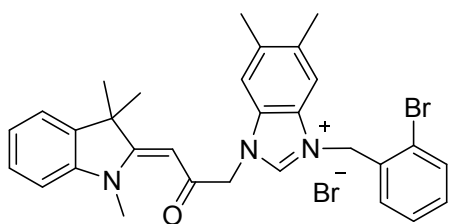

**27**

3-(2-bromobenzyl)-5,6-dimethyl-1-(2-oxo-3-(1,3,3-trimethylindolin-2-ylidene)propyl)-1H-benzo[d]imidazol-3-ium bromide

Yield 88%. White solid. Mp 281-284°C. IR  $\nu_{\max}$  (cm<sup>-1</sup>): 3429, 2924, 1649, 1543, 1450, 1368, 1192, 1131, 931, 747. <sup>1</sup>H NMR (300 MHz, DMSO-d<sub>6</sub>): δ = 9.63 (1H, s), 7.77 (3H, d, J= 4.2 Hz), 7.48-7.36 (2H, m), 7.31 (1H, d, J= 7.2 Hz), 7.24 (1H, d, J= 7.8 Hz), 7.11 (1H, d, J= 7.8 Hz), 7.03 (1H, t, J= 7.2 Hz), 5.87 (2H, s), 5.65 (1H, s), 5.54 (2H, s), 3.34 (3H, s), 2.38 (6H, s), 1.58 (6H, s). <sup>13</sup>C NMR (75 MHz, DMSO-d<sub>6</sub>): δ = 183.42, 172.55, 142.96, 142.80, 139.29, 136.62, 136.50, 133.29, 132.89, 130.91, 130.34, 130.15, 129.23, 128.44, 127.70, 122.94, 122.68, 121.72, 113.14, 108.95, 89.07, 54.70, 50.18, 47.97, 29.85, 22.48, 19.96. HRMS (ESI-TOF) *m/z* Calcd for C<sub>30</sub>H<sub>31</sub>BrN<sub>3</sub>O<sup>+</sup> [M-Br]<sup>+</sup> 528.1645, found 528.1646.

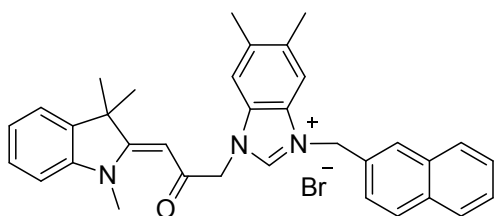

**28**

5,6-dimethyl-3-(naphthalen-2-ylmethyl)-1-(2-oxo-3-(1,3,3-trimethylindolin-2-ylidene)propyl)-1H-benzo[d]imidazol-3-ium bromide

White solid. Yield 92%. Mp 228-230°C. IR  $\nu_{\max}$  (cm<sup>-1</sup>): 3432, 2928, 2352, 1643, 1541,

1480, 1370, 1130, 932, 752.  $^1\text{H}$  NMR (300 MHz, DMSO- $d_6$ ):  $\delta$  = 9.79 (1H, s), 8.05 (1H, s), 8.00-7.89 (3H, m), 7.86 (1H, s), 7.77 (1H, s), 7.61-7.55 (3H, m), 7.32 (1H, d,  $J$  = 7.2 Hz), 7.26 (1H, d,  $J$  = 8.4 Hz), 7.11 (1H, d,  $J$  = 7.8 Hz), 7.04 (1H, d,  $J$  = 7.2 Hz), 5.98 (2H, s), 5.65 (1H, s), 5.53 (2H, s), 3.33 (3H, s), 2.36 (6H, s), 1.60 (6H, s).  $^{13}\text{C}$  NMR (75 MHz, DMSO- $d_6$ ):  $\delta$  = 183.49, 142.95, 132.70, 131.69, 130.45, 129.10, 128.78, 127.67, 127.10, 126.72, 125.42, 122.70, 121.74, 113.19, 89.04, 54.63, 49.78, 47.98, 29.83, 22.47, 19.95. HRMS (ESI-TOF)  $m/z$  Calcd for  $\text{C}_{34}\text{H}_{34}\text{N}_3\text{O}^+$   $[\text{M}-\text{Br}]^+$  500.2696, found 500.2698.

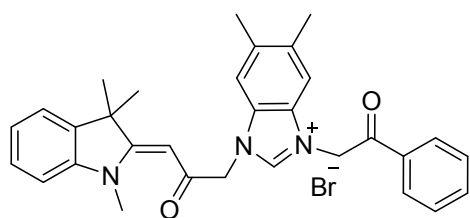

**29**

5,6-dimethyl-3-(2-oxo-2-phenylethyl)-1-(2-oxo-3-(1,3,3-trimethylindolin-2-ylidene)propyl)-1H-benzo[d]imidazol-3-ium bromide

Yield 80%. Yellow solid. Mp 239-242°C. IR  $\nu_{\text{max}}$  ( $\text{cm}^{-1}$ ): 3434, 2956, 1699, 1634, 1534, 1482, 1371, 1228, 1134, 932, 754.  $^1\text{H}$  NMR (300 MHz, DMSO- $d_6$ ):  $\delta$  = 9.54 (1H, s), 8.15 (2H, d,  $J$  = 7.2 Hz), 7.88 (1H, s), 7.79 (2H, s), 7.68 (2H, t,  $J$  = 7.2 Hz), 7.32 (1H, d,  $J$  = 7.2 Hz), 7.26 (1H, t,  $J$  = 7.5 Hz), 7.12 (1H, d,  $J$  = 7.5 Hz), 7.03 (1H, t,  $J$  = 7.2 Hz), 6.44 (2H, s), 5.67 (1H, s), 5.63 (2H, s), 3.35 (3H, s), 2.39 (6H, d,  $J$  = 8.7 Hz), 1.60 (6H, s).  $^{13}\text{C}$  NMR (75 MHz, DMSO- $d_6$ ):  $\delta$  = 191.27, 183.49, 172.58, 143.20, 142.99, 139.32, 136.32, 134.53, 133.82, 130.10, 129.89, 129.04, 128.39, 127.72, 122.71, 121.76, 113.39, 112.93, 108.98, 89.12, 54.63, 53.17, 48.00, 29.87, 22.50, 19.99. HRMS (ESI-TOF)  $m/z$  Calcd for  $\text{C}_{31}\text{H}_{32}\text{N}_3\text{O}_2^+$   $[\text{M}-\text{Br}]^+$  478.2489, found 478.2486.

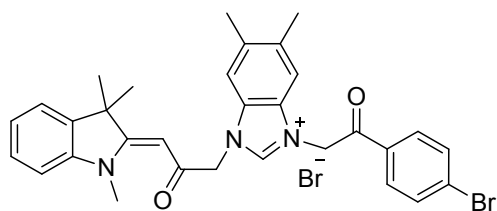

**30**

3-(2-(4-bromophenyl)-2-oxoethyl)-5,6-dimethyl-1-(2-oxo-3-(1,3,3-trimethylindolin-2-ylidene)propyl)-1H-benzo[d]imidazol-3-ium bromide

Yield 95%. Yellow solid. Mp 201-202°C. IR  $\nu_{\max}$  (cm<sup>-1</sup>): 3427, 2959, 2354, 1697, 1540, 1480, 1372, 1226, 1132, 1073, 933, 821, 751. <sup>1</sup>H NMR (300 MHz, DMSO-d<sub>6</sub>):  $\delta$  = 9.52 (1H, s), 8.07 (2H, d, J= 7.2 Hz), 7.92 (2H, s), 7.88 (1H, d, J= 5.1 Hz), 7.78 (1H, s), 7.31 (1H, d, J= 6.6 Hz), 7.24 (1H, d, J= 6.6 Hz), 7.11 (1H, d, J= 7.2 Hz), 7.04 (1H, d, J= 7.2 Hz), 6.441 (2H, s), 5.65 (1H, s), 5.61 (2H, s), 3.35 (3H, s), 2.39 (6H, d, J= 7.5 Hz), 1.60 (6H, s). <sup>13</sup>C NMR (75 MHz, DMSO-d<sub>6</sub>):  $\delta$  = 190.66, 183.46, 172.61, 143.17, 142.98, 139.32, 136.34, 132.89, 132.12, 130.34, 130.06, 129.88, 128.64, 127.73, 122.72, 121.76, 113.39, 112.92, 108.98, 89.11, 54.63, 53.14, 48.00, 29.86, 22.50, 19.93. HRMS (ESI-TOF)  $m/z$  Calcd for C<sub>31</sub>H<sub>31</sub>BrN<sub>3</sub>O<sub>2</sub><sup>+</sup> [M-Br]<sup>+</sup> 556.1594, found 556.1592.

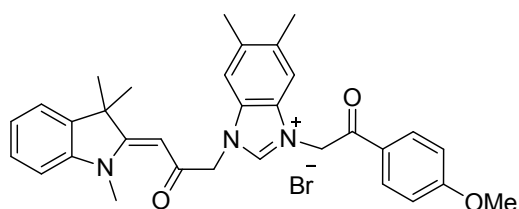

**31**

3-(2-(4-methoxyphenyl)-2-oxoethyl)-5,6-dimethyl  
-1-(2-oxo-3-(1,3,3-trimethylindolin-2-ylidene)propyl)  
-1H-benzo[d]imidazol-3-ium bromide

Yield 71%. Yellow solid. Mp 183-185°C. IR  $\nu_{\max}$  (cm<sup>-1</sup>): 3427, 2957, 1682, 1601, 1539, 1481, 1369, 1241, 1177, 1130, 1016, 932, 836, 752. <sup>1</sup>H NMR (300 MHz, DMSO-d<sub>6</sub>):  $\delta$  = 9.53 (1H, s), 8.12 (2H, d, J= 8.4 Hz), 7.84 (1H, s), 7.78 (1H, s), 7.33-7.18 (4H, m), 7.11 (1H, d, J= 7.5 Hz), 7.03 (1H, t, J= 7.2 Hz), 6.37 (2H, s), 5.65 (1H, s), 5.61 (2H, s), 3.91 (3H, s), 3.35 (3H, s), 2.39 (6H, d, J= 8.1 Hz), 1.60 (6H, s). <sup>13</sup>C NMR (75 MHz, DMSO-d<sub>6</sub>):  $\delta$  = 189.46, 183.48, 164.19, 143.24, 136.30, 130.83, 130.11, 129.88, 126.65, 122.72, 121.75, 114.31, 113.32, 112.91, 108.89, 89.09, 55.80, 54.16, 52.72, 48.00, 29.86, 22.50, 19.98. HRMS (ESI-TOF)  $m/z$  Calcd for C<sub>32</sub>H<sub>34</sub>N<sub>3</sub>O<sub>3</sub><sup>+</sup> [M-Br]<sup>+</sup> 508.2594, found 508.2594.

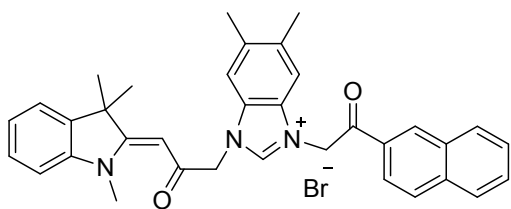

5,6-dimethyl-3-(2-(naphthalen-2-yl)-2-oxoethyl)-  
1-(2-oxo-3-(1,3,3-trimethylindolin-2-ylidene)propyl)-  
-1*H*-benzo[d]imidazol-3-ium bromide

32

Yield 82%. Red solid. Mp 193-195°C. IR  $\nu_{\max}$  (cm<sup>-1</sup>): 3415, 2957, 1688, 1540, 1475, 1369, 1186, 1130, 932, 752. <sup>1</sup>H NMR (300 MHz, DMSO-d<sub>6</sub>):  $\delta$  = 9.61 (1H, s), 8.95 (1H, s), 8.24 (1H, d, J= 7.8 Hz), 8.16 (1H, d, J= 8.7 Hz), 8.09 (2H, d, J= 8.1 Hz), 7.93 (1H, s), 7.80 (1H, s), 7.74 (2H, t, J= 7.8 Hz), 7.32 (1H, d, J= 7.2 Hz), 7.26 (1H, t, J= 7.5 Hz), 7.12 (1H, d, J= 7.8 Hz), 7.04 (1H, t, J= 7.2 Hz), 6.58 (2H, s), 5.68 (1H, s), 5.65 (2H, s), 3.37 (3H, s), 2.39 (6H, d, J= 9.9 Hz), 1.62 (6H, s). <sup>13</sup>C NMR (75 MHz, DMSO-d<sub>6</sub>):  $\delta$  = 191.15, 183.48, 172.57, 143.24, 142.96, 139.30, 136.31, 135.53, 132.01, 131.11, 130.79, 130.11, 129.90, 129.65, 129.30, 128.65, 127.86, 127.70, 127.36, 123.33, 122.68, 121.72, 113.37, 112.94, 108.95, 89.12, 54.64, 53.19, 47.98, 29.85, 22.49, 19.96, 19.89. HRMS (ESI-TOF) *m/z* Calcd for C<sub>35</sub>H<sub>34</sub>N<sub>3</sub>O<sub>2</sub><sup>+</sup> [M-Br]<sup>+</sup> 528.2645, found 528.2644.

### 3. X-ray crystal structure of compound 24



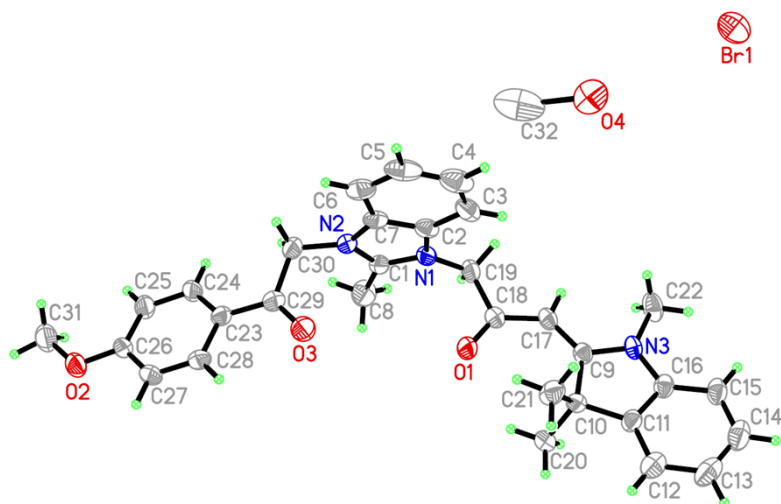

**Fig. 1** X-ray crystal structure of compound **24**.

data\_24

|                          |                     |
|--------------------------|---------------------|
| _audit_creation_method   | SHELXL-97           |
| _chemical_formula_sum    | 'C63 H66 Br2 N6 O7' |
| _chemical_formula_weight | 1179.02             |

loop\_

| _atom_type_symbol | _atom_type_description | _atom_type_scatter_dispersion_real | _atom_type_scatter_dispersion_imag | _atom_type_scatter_source |
|-------------------|------------------------|------------------------------------|------------------------------------|---------------------------|
|-------------------|------------------------|------------------------------------|------------------------------------|---------------------------|

|     |     |        |        |  |
|-----|-----|--------|--------|--|
| 'C' | 'C' | 0.0033 | 0.0016 |  |
|-----|-----|--------|--------|--|

'International Tables Vol C Tables 4.2.6.8 and 6.1.1.4'

|      |      |         |        |  |
|------|------|---------|--------|--|
| 'Br' | 'Br' | -0.2901 | 2.4595 |  |
|------|------|---------|--------|--|

'International Tables Vol C Tables 4.2.6.8 and 6.1.1.4'

|     |     |        |        |  |
|-----|-----|--------|--------|--|
| 'N' | 'N' | 0.0061 | 0.0033 |  |
|-----|-----|--------|--------|--|

'International Tables Vol C Tables 4.2.6.8 and 6.1.1.4'

'O' 'O' 0.0106 0.0060

'International Tables Vol C Tables 4.2.6.8 and 6.1.1.4'

'H' 'H' 0.0000 0.0000

'International Tables Vol C Tables 4.2.6.8 and 6.1.1.4'

\_symmetry\_cell\_setting                      Monoclinic  
\_symmetry\_space\_group\_name\_H-M        P2(1)/c

loop\_

  \_symmetry\_equiv\_pos\_as\_xyz

  'x, y, z'

  '-x, y+1/2, -z+1/2'

  '-x, -y, -z'

  'x, -y-1/2, z-1/2'

\_cell\_length\_a                              16.6110(16)  
\_cell\_length\_b                              14.920(2)  
\_cell\_length\_c                              12.644(2)  
\_cell\_angle\_alpha                           90.00  
\_cell\_angle\_beta                            111.924(8)  
\_cell\_angle\_gamma                           90.00  
\_cell\_volume                                2907.0(7)  
\_cell\_formula\_units\_Z                      2  
\_cell\_measurement\_temperature            298(2)  
\_cell\_measurement\_reflns\_used            1908  
\_cell\_measurement\_theta\_min              2.22  
\_cell\_measurement\_theta\_max              19.16

\_exptl\_crystal\_description                block

|                                 |                          |
|---------------------------------|--------------------------|
| _exptl_crystal_colour           | yellow                   |
| _exptl_crystal_size_max         | 0.42                     |
| _exptl_crystal_size_mid         | 0.40                     |
| _exptl_crystal_size_min         | 0.36                     |
| _exptl_crystal_density_meas     | ?                        |
| _exptl_crystal_density_diffn    | 1.347                    |
| _exptl_crystal_density_method   | 'not measured'           |
| _exptl_crystal_F_000            | 1224                     |
| _exptl_absorpt_coefficient_mu   | 1.452                    |
| _exptl_absorpt_correction_type  | ?                        |
| _exptl_absorpt_correction_T_min | 0.5806                   |
| _exptl_absorpt_correction_T_max | 0.6229                   |
| _exptl_absorpt_process_details  | ?                        |
| <br>_exptl_special_details      |                          |
| _diffn_ambient_temperature      | 298(2)                   |
| _diffn_radiation_wavelength     | 0.71073                  |
| _diffn_radiation_type           | MoK\alpha                |
| _diffn_radiation_source         | 'fine-focus sealed tube' |
| _diffn_radiation_monochromator  | graphite                 |
| _diffn_measurement_device_type  | ?                        |
| _diffn_measurement_method       | ?                        |
| _diffn_detector_area_resol_mean | ?                        |
| _diffn_standards_number         | ?                        |
| _diffn_standards_interval_count | ?                        |
| _diffn_standards_interval_time  | ?                        |
| _diffn_standards_decay_%        | ?                        |
| _diffn_reflns_number            | 16139                    |
| _diffn_reflns_av_R_equivalents  | 0.0661                   |

|                                 |                               |
|---------------------------------|-------------------------------|
| _diffn_reflns_av_sigmaI/netI    | 0.0888                        |
| _diffn_reflns_limit_h_min       | -19                           |
| _diffn_reflns_limit_h_max       | 19                            |
| _diffn_reflns_limit_k_min       | -17                           |
| _diffn_reflns_limit_k_max       | 12                            |
| _diffn_reflns_limit_l_min       | -15                           |
| _diffn_reflns_limit_l_max       | 14                            |
| _diffn_reflns_theta_min         | 1.90                          |
| _diffn_reflns_theta_max         | 25.00                         |
| _reflns_number_total            | 5093                          |
| _reflns_number_gt               | 2544                          |
| _reflns_threshold_expression    | >2sigma(I)                    |
|                                 |                               |
| _computing_data_collection      | 'Bruker SMART'                |
| _computing_cell_refinement      | 'Bruker SMART'                |
| _computing_data_reduction       | 'Bruker SAINT'                |
| _computing_structure_solution   | 'SHELXS-97 (Sheldrick, 1990)' |
| _computing_structure_refinement | 'SHELXL-97 (Sheldrick, 1997)' |
| _computing_molecular_graphics   | 'Bruker SHELXTL'              |
| _computing_publication_material | 'Bruker SHELXTL'              |

\_refine\_special\_details

;

Refinement of  $F^2$  against ALL reflections. The weighted R-factor  $wR$  and goodness of fit  $S$  are based on  $F^2$ , conventional R-factors  $R$  are based on  $F$ , with  $F$  set to zero for negative  $F^2$ . The threshold expression of  $F^2 > 2\text{sigma}(F^2)$  is used only for calculating R-factors(gt) etc. and is not relevant to the choice of reflections for refinement. R-factors based on  $F^2$  are statistically about twice as large as those based on  $F$ , and R-factors based on ALL data will be even larger.

|                                  |                                                                         |
|----------------------------------|-------------------------------------------------------------------------|
| _refine_ls_structure_factor_coef | Fsqd                                                                    |
| _refine_ls_matrix_type           | full                                                                    |
| _refine_ls_weighting_scheme      | calc                                                                    |
| _refine_ls_weighting_details     | 'calc w=1/[\s^2^(Fo^2^)+(0.0943P)^2^+0.0000P] where P=(Fo^2^+2Fc^2^)/3' |
| _atom_sites_solution_primary     | direct                                                                  |
| _atom_sites_solution_secondary   | difmap                                                                  |
| _atom_sites_solution_hydrogens   | geom                                                                    |
| _refine_ls_hydrogen_treatment    | mixed                                                                   |
| _refine_ls_extinction_method     | none                                                                    |
| _refine_ls_extinction_coef       | ?                                                                       |
| _refine_ls_number_reflns         | 5093                                                                    |
| _refine_ls_number_parameters     | 361                                                                     |
| _refine_ls_number_restraints     | 0                                                                       |
| _refine_ls_R_factor_all          | 0.1348                                                                  |
| _refine_ls_R_factor_gt           | 0.0570                                                                  |
| _refine_ls_wR_factor_ref         | 0.1858                                                                  |
| _refine_ls_wR_factor_gt          | 0.1446                                                                  |
| _refine_ls_goodness_of_fit_ref   | 0.968                                                                   |
| _refine_ls_restrained_S_all      | 0.968                                                                   |
| _refine_ls_shift/su_max          | 0.002                                                                   |
| _refine_ls_shift/su_mean         | 0.000                                                                   |

loop\_

|                        |
|------------------------|
| _atom_site_label       |
| _atom_site_type_symbol |
| _atom_site_fract_x     |
| _atom_site_fract_y     |
| _atom_site_fract_z     |

\_atom\_site\_U\_iso\_or\_equiv  
\_atom\_site\_adp\_type  
\_atom\_site\_occupancy  
\_atom\_site\_symmetry\_multiplicity  
\_atom\_site\_calc\_flag  
\_atom\_site\_refinement\_flags  
\_atom\_site\_disorder\_assembly  
\_atom\_site\_disorder\_group

O1 O 0.1041(2) -0.9806(3) 0.1029(3) 0.0704(10) Uani 1 1 d . . .  
O2 O 0.1911(2) -0.6137(3) -0.0755(4) 0.0888(13) Uani 1 1 d . . .  
O3 O 0.1997(2) -0.3165(2) -0.0665(4) 0.0862(13) Uani 1 1 d . . .  
N1 N 0.3517(2) -0.5492(3) 0.0282(3) 0.0517(10) Uani 1 1 d . . .  
N2 N 0.3535(2) -0.4024(3) 0.0351(3) 0.0518(10) Uani 1 1 d . . .  
N3 N 0.2337(3) -0.0270(3) -0.1113(3) 0.0522(10) Uani 1 1 d . . .  
C1 C 0.1530(4) -1.0349(4) 0.1999(5) 0.091(2) Uani 1 1 d . . .  
H1A H 0.1194 -1.0866 0.2029 0.136 Uiso 1 1 calc R . .  
H1B H 0.1660 -1.0005 0.2684 0.136 Uiso 1 1 calc R . .  
H1C H 0.2060 -1.0538 0.1930 0.136 Uiso 1 1 calc R . .  
C2 C 0.1405(3) -0.9042(3) 0.0843(4) 0.0531(13) Uani 1 1 d . . .  
C3 C 0.0920(3) -0.8559(4) -0.0116(4) 0.0576(14) Uani 1 1 d . . .  
H3A H 0.0373 -0.8763 -0.0581 0.069 Uiso 1 1 calc R . .  
C4 C 0.1238(3) -0.7787(4) -0.0387(4) 0.0555(13) Uani 1 1 d . . .  
H4A H 0.0898 -0.7463 -0.1026 0.067 Uiso 1 1 calc R . .  
C5 C 0.2070(3) -0.7471(3) 0.0280(4) 0.0509(13) Uani 1 1 d . . .  
C6 C 0.2539(3) -0.7961(3) 0.1255(5) 0.0641(15) Uani 1 1 d . . .  
H6A H 0.3086 -0.7764 0.1728 0.077 Uiso 1 1 calc R . .  
C7 C 0.2206(3) -0.8732(4) 0.1531(4) 0.0671(15) Uani 1 1 d . . .  
H7A H 0.2527 -0.9045 0.2190 0.081 Uiso 1 1 calc R . .  
C8 C 0.2387(3) -0.6643(4) -0.0037(4) 0.0580(14) Uani 1 1 d . . .

C9 C 0.3351(3) -0.6409(4) 0.0505(5) 0.0634(15) Uani 1 1 d . . .  
H9A H 0.3550 -0.6501 0.1322 0.076 Uiso 1 1 calc R . .  
H9B H 0.3677 -0.6807 0.0208 0.076 Uiso 1 1 calc R . .  
C10 C 0.3820(3) -0.5192(4) -0.0546(4) 0.0549(14) Uani 1 1 d . . .  
C11 C 0.4110(3) -0.5660(4) -0.1300(5) 0.0704(16) Uani 1 1 d . . .  
H11A H 0.4128 -0.6283 -0.1327 0.084 Uiso 1 1 calc R . .  
C12 C 0.4371(4) -0.5106(7) -0.2005(5) 0.088(2) Uani 1 1 d . . .  
H12A H 0.4575 -0.5371 -0.2523 0.105 Uiso 1 1 calc R . .  
C13 C 0.4339(4) -0.4167(6) -0.1967(6) 0.091(2) Uani 1 1 d . . .  
H13A H 0.4503 -0.3833 -0.2475 0.110 Uiso 1 1 calc R . .  
C14 C 0.4078(3) -0.3737(5) -0.1219(5) 0.0697(16) Uani 1 1 d . . .  
H14A H 0.4072 -0.3115 -0.1182 0.084 Uiso 1 1 calc R . .  
C15 C 0.3818(3) -0.4261(4) -0.0507(4) 0.0535(13) Uani 1 1 d . . .  
C16 C 0.3345(3) -0.4769(4) 0.0791(4) 0.0511(13) Uani 1 1 d . . .  
C17 C 0.2986(4) -0.4801(4) 0.1698(5) 0.0816(18) Uani 1 1 d . . .  
H17A H 0.2919 -0.4202 0.1930 0.122 Uiso 1 1 calc R . .  
H17B H 0.3375 -0.5128 0.2340 0.122 Uiso 1 1 calc R . .  
H17C H 0.2432 -0.5094 0.1414 0.122 Uiso 1 1 calc R . .  
C18 C 0.3452(3) -0.3106(3) 0.0670(5) 0.0610(14) Uani 1 1 d . . .  
H18A H 0.3954 -0.2764 0.0691 0.073 Uiso 1 1 calc R . .  
H18B H 0.3430 -0.3094 0.1425 0.073 Uiso 1 1 calc R . .  
C19 C 0.2623(3) -0.2677(4) -0.0189(5) 0.0614(14) Uani 1 1 d . . .  
C20 C 0.2708(3) -0.1737(3) -0.0334(5) 0.0602(14) Uani 1 1 d . . .  
H20A H 0.3230 -0.1484 0.0140 0.072 Uiso 1 1 calc R . .  
C21 C 0.2130(3) -0.1153(3) -0.1070(4) 0.0488(12) Uani 1 1 d . . .  
C22 C 0.1211(3) -0.1307(3) -0.1932(4) 0.0537(13) Uani 1 1 d . . .  
C23 C 0.0598(3) -0.1578(4) -0.1343(5) 0.0733(17) Uani 1 1 d . . .  
H23A H 0.0624 -0.1139 -0.0775 0.110 Uiso 1 1 calc R . .  
H23B H 0.0769 -0.2152 -0.0985 0.110 Uiso 1 1 calc R . .  
H23C H 0.0016 -0.1613 -0.1896 0.110 Uiso 1 1 calc R . .

C24 C 0.1199(4) -0.1985(4) -0.2844(5) 0.0728(17) Uani 1 1 d . . .  
 H24A H 0.1592 -0.1794 -0.3196 0.109 Uiso 1 1 calc R . .  
 H24B H 0.0623 -0.2025 -0.3411 0.109 Uiso 1 1 calc R . .  
 H24C H 0.1375 -0.2561 -0.2498 0.109 Uiso 1 1 calc R . .  
 C25 C 0.0989(3) -0.0386(3) -0.2451(4) 0.0556(13) Uani 1 1 d . . .  
 C26 C 0.0233(4) -0.0070(4) -0.3304(5) 0.0841(19) Uani 1 1 d . . .  
 H26A H -0.0246 -0.0170 -0.3055 0.101 Uiso 1 1 calc R . .  
 H26B H 0.0126 -0.0435 -0.3978 0.101 Uiso 1 1 calc R . .  
 C27 C 0.0212(5) 0.0831(5) -0.3628(6) 0.091(2) Uani 1 1 d . . .  
 H27A H -0.0291 0.1059 -0.4180 0.109 Uiso 1 1 calc R . .  
 C28 C 0.0911(5) 0.1386(5) -0.3151(6) 0.0834(19) Uani 1 1 d . . .  
 H28A H 0.0881 0.1976 -0.3400 0.100 Uiso 1 1 calc R . .  
 C29 C 0.1665(4) 0.1079(4) -0.2300(5) 0.0681(15) Uani 1 1 d . . .  
 H29A H 0.2145 0.1450 -0.1977 0.082 Uiso 1 1 calc R . .  
 C30 C 0.1673(3) 0.0199(4) -0.1954(4) 0.0546(13) Uani 1 1 d . . .  
 C31 C 0.3150(4) 0.0131(4) -0.0360(5) 0.0785(17) Uani 1 1 d . . .  
 H31A H 0.3501 -0.0317 0.0149 0.118 Uiso 1 1 calc R . .  
 H31B H 0.3029 0.0604 0.0075 0.118 Uiso 1 1 calc R . .  
 H31C H 0.3456 0.0372 -0.0808 0.118 Uiso 1 1 calc R . .  
 Br1 Br 0.55540(4) -0.18346(4) 0.12110(5) 0.0810(3) Uani 1 1 d . . .  
 O4 O 0.4836(6) -0.3259(6) 0.3256(7) 0.091(3) Uani 0.50 1 d P . .  
 C32 C 0.4681(9) -0.4226(15) 0.3777(13) 0.132(7) Uani 0.50 1 d P . .

loop\_

\_atom\_site\_aniso\_label

\_atom\_site\_aniso\_U\_11

\_atom\_site\_aniso\_U\_22

\_atom\_site\_aniso\_U\_33

\_atom\_site\_aniso\_U\_23

\_atom\_site\_aniso\_U\_13



\_atom\_site\_aniso\_U\_12

O1 0.063(2) 0.058(3) 0.077(3) 0.000(2) 0.010(2) -0.014(2)  
O2 0.061(2) 0.081(3) 0.102(3) 0.036(3) 0.004(2) 0.000(2)  
O3 0.052(2) 0.047(2) 0.135(4) 0.010(2) 0.005(2) -0.008(2)  
N1 0.042(2) 0.047(3) 0.063(3) 0.005(2) 0.016(2) 0.001(2)  
N2 0.043(2) 0.056(3) 0.054(3) 0.008(2) 0.014(2) -0.002(2)  
N3 0.062(3) 0.037(3) 0.058(3) -0.004(2) 0.022(2) -0.013(2)  
C1 0.086(4) 0.067(4) 0.098(5) 0.013(4) 0.010(4) -0.013(4)  
C2 0.046(3) 0.046(3) 0.064(3) -0.006(3) 0.016(3) -0.004(3)  
C3 0.042(3) 0.064(4) 0.058(3) -0.006(3) 0.008(3) -0.011(3)  
C4 0.045(3) 0.063(4) 0.052(3) 0.003(3) 0.011(2) 0.006(3)  
C5 0.043(3) 0.048(3) 0.055(3) 0.000(3) 0.010(2) 0.006(3)  
C6 0.044(3) 0.053(4) 0.074(4) 0.007(3) -0.003(3) -0.006(3)  
C7 0.057(3) 0.053(4) 0.070(4) 0.010(3) 0.000(3) -0.007(3)  
C8 0.050(3) 0.058(4) 0.060(3) 0.004(3) 0.014(3) 0.004(3)  
C9 0.056(3) 0.048(4) 0.075(4) 0.010(3) 0.011(3) 0.007(3)  
C10 0.035(3) 0.076(4) 0.048(3) 0.004(3) 0.008(2) 0.005(3)  
C11 0.046(3) 0.095(5) 0.060(4) -0.014(3) 0.007(3) 0.006(3)  
C12 0.045(3) 0.166(8) 0.049(4) -0.016(5) 0.013(3) 0.002(5)  
C13 0.058(4) 0.143(8) 0.067(5) 0.023(5) 0.016(3) -0.005(5)  
C14 0.055(3) 0.088(5) 0.063(4) 0.016(4) 0.019(3) -0.011(3)  
C15 0.038(3) 0.074(4) 0.044(3) 0.011(3) 0.011(2) 0.001(3)  
C16 0.046(3) 0.052(4) 0.058(3) 0.007(3) 0.022(2) 0.003(3)  
C17 0.099(4) 0.082(5) 0.083(4) 0.014(4) 0.056(4) 0.006(4)  
C18 0.059(3) 0.045(4) 0.072(4) 0.004(3) 0.016(3) -0.011(3)  
C19 0.052(3) 0.048(4) 0.080(4) 0.002(3) 0.020(3) -0.005(3)  
C20 0.053(3) 0.044(3) 0.075(4) -0.004(3) 0.014(3) -0.016(3)  
C21 0.053(3) 0.044(3) 0.053(3) -0.006(3) 0.024(3) -0.004(3)  
C22 0.043(3) 0.044(3) 0.072(3) -0.003(3) 0.019(3) -0.002(2)  
C23 0.052(3) 0.065(4) 0.106(5) 0.013(3) 0.033(3) -0.004(3)

C24 0.068(4) 0.058(4) 0.082(4) -0.018(3) 0.015(3) 0.006(3)  
 C25 0.060(3) 0.047(3) 0.063(3) 0.005(3) 0.027(3) 0.012(3)  
 C26 0.090(5) 0.089(5) 0.080(4) 0.007(4) 0.039(4) 0.024(4)  
 C27 0.106(5) 0.085(6) 0.084(5) 0.030(4) 0.037(4) 0.041(5)  
 C28 0.119(6) 0.056(4) 0.097(5) 0.014(4) 0.064(5) 0.017(5)  
 C29 0.092(4) 0.044(4) 0.086(4) 0.004(3) 0.053(4) 0.005(3)  
 C30 0.070(4) 0.045(3) 0.056(3) -0.003(3) 0.031(3) 0.001(3)  
 C31 0.092(4) 0.056(4) 0.075(4) -0.008(3) 0.017(3) -0.030(3)  
 Br1 0.0686(4) 0.0851(5) 0.0862(5) -0.0078(4) 0.0253(3) -0.0177(3)  
 O4 0.098(6) 0.093(7) 0.071(5) -0.020(5) 0.018(5) -0.003(5)  
 C32 0.086(10) 0.22(2) 0.096(11) -0.051(12) 0.040(9) -0.016(12)

#### \_geom\_special\_details

All esds (except the esd in the dihedral angle between two l.s. planes) are estimated using the full covariance matrix. The cell esds are taken into account individually in the estimation of esds in distances, angles and torsion angles; correlations between esds in cell parameters are only used when they are defined by crystal symmetry. An approximate (isotropic) treatment of cell esds is used for estimating esds involving l.s. planes.

#### loop\_

\_geom\_bond\_atom\_site\_label\_1

\_geom\_bond\_atom\_site\_label\_2

\_geom\_bond\_distance

\_geom\_bond\_site\_symmetry\_2

\_geom\_bond\_publ\_flag

O1 C2 1.353(6) . ?

O1 C1 1.441(6) . ?

O2 C8 1.218(6) . ?

O3 C19 1.228(6) . ?  
N1 C16 1.341(6) . ?  
N1 C10 1.395(6) . ?  
N1 C9 1.444(6) . ?  
N2 C16 1.333(6) . ?  
N2 C15 1.380(6) . ?  
N2 C18 1.448(6) . ?  
N3 C21 1.367(6) . ?  
N3 C30 1.400(6) . ?  
N3 C31 1.460(6) . ?  
C1 H1A 0.9600 . ?  
C1 H1B 0.9600 . ?  
C1 H1C 0.9600 . ?  
C2 C7 1.369(6) . ?  
C2 C3 1.382(7) . ?  
C3 C4 1.363(7) . ?  
C3 H3A 0.9300 . ?  
C4 C5 1.404(6) . ?  
C4 H4A 0.9300 . ?  
C5 C6 1.395(6) . ?  
C5 C8 1.457(7) . ?  
C6 C7 1.376(7) . ?  
C6 H6A 0.9300 . ?  
C7 H7A 0.9300 . ?  
C8 C9 1.528(7) . ?  
C9 H9A 0.9700 . ?  
C9 H9B 0.9700 . ?  
C10 C15 1.389(7) . ?  
C10 C11 1.404(7) . ?  
C11 C12 1.399(9) . ?

C11 H11A 0.9300 . ?  
C12 C13 1.403(9) . ?  
C12 H12A 0.9300 . ?  
C13 C14 1.342(9) . ?  
C13 H13A 0.9300 . ?  
C14 C15 1.378(7) . ?  
C14 H14A 0.9300 . ?  
C16 C17 1.477(6) . ?  
C17 H17A 0.9600 . ?  
C17 H17B 0.9600 . ?  
C17 H17C 0.9600 . ?  
C18 C19 1.539(7) . ?  
C18 H18A 0.9700 . ?  
C18 H18B 0.9700 . ?  
C19 C20 1.427(7) . ?  
C20 C21 1.371(6) . ?  
C20 H20A 0.9300 . ?  
C21 C22 1.526(6) . ?  
C22 C25 1.508(7) . ?  
C22 C23 1.523(7) . ?  
C22 C24 1.529(7) . ?  
C23 H23A 0.9600 . ?  
C23 H23B 0.9600 . ?  
C23 H23C 0.9600 . ?  
C24 H24A 0.9600 . ?  
C24 H24B 0.9600 . ?  
C24 H24C 0.9600 . ?  
C25 C30 1.384(7) . ?  
C25 C26 1.396(7) . ?  
C26 C27 1.402(8) . ?

C26 H26A 0.9700 . ?  
C26 H26B 0.9700 . ?  
C27 C28 1.369(9) . ?  
C27 H27A 0.9300 . ?  
C28 C29 1.389(8) . ?  
C28 H28A 0.9300 . ?  
C29 C30 1.383(7) . ?  
C29 H29A 0.9300 . ?  
C31 H31A 0.9600 . ?  
C31 H31B 0.9600 . ?  
C31 H31C 0.9600 . ?  
O4 C32 1.65(2) . ?

loop\_

\_geom\_angle\_atom\_site\_label\_1  
\_geom\_angle\_atom\_site\_label\_2  
\_geom\_angle\_atom\_site\_label\_3  
\_geom\_angle  
\_geom\_angle\_site\_symmetry\_1  
\_geom\_angle\_site\_symmetry\_3  
\_geom\_angle\_publ\_flag

C2 O1 C1 118.3(4) . . ?  
C16 N1 C10 107.7(4) . . ?  
C16 N1 C9 125.3(4) . . ?  
C10 N1 C9 126.9(5) . . ?  
C16 N2 C15 108.5(4) . . ?  
C16 N2 C18 127.6(4) . . ?  
C15 N2 C18 123.9(4) . . ?  
C21 N3 C30 111.9(4) . . ?  
C21 N3 C31 123.7(4) . . ?

C30 N3 C31 124.4(4) . . ?  
O1 C1 H1A 109.5 . . ?  
O1 C1 H1B 109.5 . . ?  
H1A C1 H1B 109.5 . . ?  
O1 C1 H1C 109.5 . . ?  
H1A C1 H1C 109.5 . . ?  
H1B C1 H1C 109.5 . . ?  
O1 C2 C7 124.5(5) . . ?  
O1 C2 C3 116.1(4) . . ?  
C7 C2 C3 119.4(5) . . ?  
C4 C3 C2 120.5(4) . . ?  
C4 C3 H3A 119.8 . . ?  
C2 C3 H3A 119.8 . . ?  
C3 C4 C5 121.3(5) . . ?  
C3 C4 H4A 119.4 . . ?  
C5 C4 H4A 119.4 . . ?  
C6 C5 C4 117.0(5) . . ?  
C6 C5 C8 123.3(4) . . ?  
C4 C5 C8 119.7(4) . . ?  
C7 C6 C5 121.2(5) . . ?  
C7 C6 H6A 119.4 . . ?  
C5 C6 H6A 119.4 . . ?  
C2 C7 C6 120.6(5) . . ?  
C2 C7 H7A 119.7 . . ?  
C6 C7 H7A 119.7 . . ?  
O2 C8 C5 122.0(5) . . ?  
O2 C8 C9 118.2(5) . . ?  
C5 C8 C9 119.8(5) . . ?  
N1 C9 C8 112.0(4) . . ?  
N1 C9 H9A 109.2 . . ?

C8 C9 H9A 109.2 . . ?  
N1 C9 H9B 109.2 . . ?  
C8 C9 H9B 109.2 . . ?  
H9A C9 H9B 107.9 . . ?  
C15 C10 N1 106.7(4) . . ?  
C15 C10 C11 121.9(5) . . ?  
N1 C10 C11 131.4(6) . . ?  
C12 C11 C10 113.9(6) . . ?  
C12 C11 H11A 123.1 . . ?  
C10 C11 H11A 123.1 . . ?  
C11 C12 C13 122.9(6) . . ?  
C11 C12 H12A 118.5 . . ?  
C13 C12 H12A 118.5 . . ?  
C14 C13 C12 121.8(7) . . ?  
C14 C13 H13A 119.1 . . ?  
C12 C13 H13A 119.1 . . ?  
C13 C14 C15 116.9(7) . . ?  
C13 C14 H14A 121.6 . . ?  
C15 C14 H14A 121.6 . . ?  
C14 C15 N2 130.5(6) . . ?  
C14 C15 C10 122.5(6) . . ?  
N2 C15 C10 107.0(4) . . ?  
N2 C16 N1 110.1(4) . . ?  
N2 C16 C17 125.3(5) . . ?  
N1 C16 C17 124.5(5) . . ?  
C16 C17 H17A 109.5 . . ?  
C16 C17 H17B 109.5 . . ?  
H17A C17 H17B 109.5 . . ?  
C16 C17 H17C 109.5 . . ?  
H17A C17 H17C 109.5 . . ?

H17B C17 H17C 109.5 . . ?  
N2 C18 C19 110.5(4) . . ?  
N2 C18 H18A 109.5 . . ?  
C19 C18 H18A 109.5 . . ?  
N2 C18 H18B 109.5 . . ?  
C19 C18 H18B 109.5 . . ?  
H18A C18 H18B 108.1 . . ?  
O3 C19 C20 128.7(5) . . ?  
O3 C19 C18 118.0(5) . . ?  
C20 C19 C18 113.3(4) . . ?  
C21 C20 C19 129.3(5) . . ?  
C21 C20 H20A 115.3 . . ?  
C19 C20 H20A 115.3 . . ?  
N3 C21 C20 121.1(4) . . ?  
N3 C21 C22 108.4(4) . . ?  
C20 C21 C22 130.5(5) . . ?  
C25 C22 C23 110.8(4) . . ?  
C25 C22 C21 101.0(4) . . ?  
C23 C22 C21 111.3(4) . . ?  
C25 C22 C24 110.0(4) . . ?  
C23 C22 C24 111.7(4) . . ?  
C21 C22 C24 111.5(4) . . ?  
C22 C23 H23A 109.5 . . ?  
C22 C23 H23B 109.5 . . ?  
H23A C23 H23B 109.5 . . ?  
C22 C23 H23C 109.5 . . ?  
H23A C23 H23C 109.5 . . ?  
H23B C23 H23C 109.5 . . ?  
C22 C24 H24A 109.5 . . ?  
C22 C24 H24B 109.5 . . ?



H24A C24 H24B 109.5 . . ?  
C22 C24 H24C 109.5 . . ?  
H24A C24 H24C 109.5 . . ?  
H24B C24 H24C 109.5 . . ?  
C30 C25 C26 119.1(5) . . ?  
C30 C25 C22 110.5(4) . . ?  
C26 C25 C22 130.3(5) . . ?  
C25 C26 C27 117.8(6) . . ?  
C25 C26 H26A 107.9 . . ?  
C27 C26 H26A 107.9 . . ?  
C25 C26 H26B 107.9 . . ?  
C27 C26 H26B 107.9 . . ?  
H26A C26 H26B 107.2 . . ?  
C28 C27 C26 121.8(6) . . ?  
C28 C27 H27A 119.1 . . ?  
C26 C27 H27A 119.1 . . ?  
C27 C28 C29 120.9(6) . . ?  
C27 C28 H28A 119.6 . . ?  
C29 C28 H28A 119.6 . . ?  
C30 C29 C28 117.2(6) . . ?  
C30 C29 H29A 121.4 . . ?  
C28 C29 H29A 121.4 . . ?  
C25 C30 C29 123.1(5) . . ?  
C25 C30 N3 108.1(4) . . ?  
C29 C30 N3 128.8(5) . . ?  
N3 C31 H31A 109.5 . . ?  
N3 C31 H31B 109.5 . . ?  
H31A C31 H31B 109.5 . . ?  
N3 C31 H31C 109.5 . . ?  
H31A C31 H31C 109.5 . . ?

H31B C31 H31C 109.5 . . ?

|                                     |        |
|-------------------------------------|--------|
| _diffn_measured_fraction_theta_max  | 0.995  |
| _diffn_reflns_theta_full            | 25.00  |
| _diffn_measured_fraction_theta_full | 0.995  |
| _refine_diff_density_max            | 0.403  |
| _refine_diff_density_min            | -0.402 |
| _refine_diff_density_rms            | 0.061  |

#### **4. Biological Assay Procedures and Results**

#### **4.1 Cytotoxicity assay**

The assay was in five kinds of cell lines (HL-60, SMMC-7721, A549, MCF-7 and SW480). Cells were cultured at 37 °C under a humidified atmosphere of 5% CO<sub>2</sub> in RPMI 1640 medium supplemented with 10% fetal serum and dispersed in replicate 96-well plates. Compounds were then added. After 48 h exposure to the compounds, cells viability were determined by the [3-(4,5-dimethylthiazol-2-yl)-2,5-diphenyl-tetrazoliumbromide] (MTT) cytotoxicity assay by measuring the absorbance at 570 nm with a microplate spectrophotometer. Each test was performed in triplicate.

#### **4.2 Cytotoxic activities of hybrid compounds 8–21 invitro<sup>b</sup> (IC<sub>50</sub>, μM<sup>a</sup>)**

| Compound   | HL-60 | SMMC-7721 | A-549 | MCF-7 | SW480 |
|------------|-------|-----------|-------|-------|-------|
| <b>DDP</b> | 1     | 6.33      | 7.25  | 15.93 | 13.57 |
| <b>8</b>   | 0.69  | 5.45      | 3     | 6.33  | 11.71 |
| <b>9</b>   |       |           | —     |       |       |
| <b>10</b>  | 2.2   | 8.42      | 15.48 | 10.45 | 18.48 |
| <b>11</b>  |       |           | —     |       |       |
| <b>12</b>  | 0.73  | 2.45      | 8.37  | 3.37  | 9.29  |
| <b>13</b>  | 0.7   | 1.98      | 2.93  | 2.96  | 4.54  |
| <b>14</b>  | 0.39  | 1.1       | 1.21  | 3.96  | 2.54  |
| <b>15</b>  | 0.47  | 1.1       | 1.4   | 1.91  | 2.23  |
| <b>16</b>  | 2.03  | 10.26     | 16.95 | 23.76 | 15.64 |
| <b>17</b>  | 1.48  | 5.8       | 8.41  | 3.76  | 4.47  |
| <b>18</b>  | 0.67  | 2.13      | 2.85  | 4.47  | 2.85  |
| <b>19</b>  | 0.24  | 1.09      | 0.77  | 2.03  | 4.95  |
| <b>20</b>  | 0.29  | 1.29      | 0.96  | 1.68  | 1.86  |
| <b>21</b>  | 0.4   | 0.87      | 1.02  | 1.92  | 2.04  |
| <b>22</b>  | 1.86  | 4.46      | 10.64 | 8.04  | 5.49  |
| <b>23</b>  | 0.69  | 3.01      | 8.25  | 1.95  | 4.19  |
| <b>24</b>  | 0.43  | 1.03      | 2.78  | 2.17  | 1.71  |
| <b>25</b>  | 0.24  | 1.09      | 0.98  | 1.13  | 1.18  |
| <b>26</b>  | 0.41  | 0.75      | 0.64  | 2.06  | 2.02  |
| <b>27</b>  | 0.6   | 1.27      | 0.89  | 1.38  | 2.04  |
| <b>28</b>  | 0.69  | 1.21      | 1.21  | 1.2   | 2.34  |
| <b>29</b>  | 0.64  | 2.45      | 3.74  | 2.36  | 3.84  |
| <b>30</b>  | 0.94  | 2.44      | 4.28  | 2.42  | 2.74  |
| <b>31</b>  | 0.38  | 1.88      | 1.67  | 2.5   | 3.46  |
| <b>32</b>  | 0.47  | 1.11      | 1.82  | 1.83  | 2.33  |

<sup>a</sup> Cytotoxicity as IC<sub>50</sub> for each cell line, is the concentration of compound which reduced by 50% the optical density of treated cells with respect to untreated cells using the MTT assay.

<sup>b</sup> Data represent the mean values of three independent determinations.

## 5. Cell apoptosis and cell cycle analysis

## 5.1 Cell apoptosis analysis

Cell apoptosis was analyzed using the Annexin V-FITC/PI Apoptosis kit (BD Biosciences, Franklin Lakes, NJ) according to the manufacturer's protocols. Cells were seeded in 6-well plates at a density of  $1.2 \times 10^6$  cells/well. After 48 h of compound treatment at the indicated concentrations, cells were collected and then washed twice with cold PBS, and then resuspended in a binding buffer containing Annexin V-FITC and propidium iodide (PI). After incubation for 15 min at room temperature in the dark, the fluorescent intensity was measured using a FACSCalibur flow cytometer (BD Biosciences, Franklin Lakes, NJ).

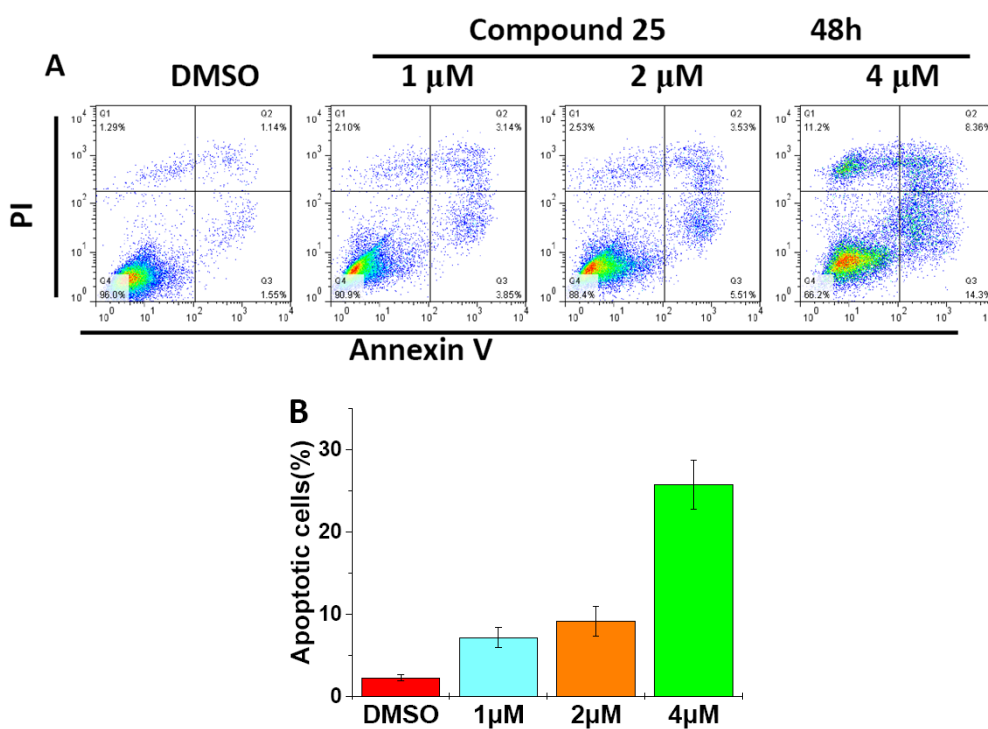

**Fig. 1** Compound **25** caused significant apoptosis of SMMC-7721 cells. (A) Cells were treated with 4, 8 and 16  $\mu\text{M}$  compound **25** for 48 h. Cell apoptosis was determined by Annexin V-FITC/PI double-staining assay. (B) The quantification of cell apoptosis. Data represents the mean  $\pm$  S.D. of three independent experiments.

## 5.2 Cell cycle analysis

To analyze the DNA content by flow cytometry, cells were collected and washed

twice with PBS. Cells were fixed with 70% ethanol overnight. Fixed cells were washed with PBS, and then stained with a 50 µg/ml propidium iodide (PI) solution containing 50 µg/ml RNase A for 30 min at room temperature. Fluorescence intensity was analyzed by FACSCalibur flow cytometer (BD Biosciences, San Jose, CA, USA). The percentages of the cells distributed in different phases of the cell cycle were determined using ModFIT LT 2.0.

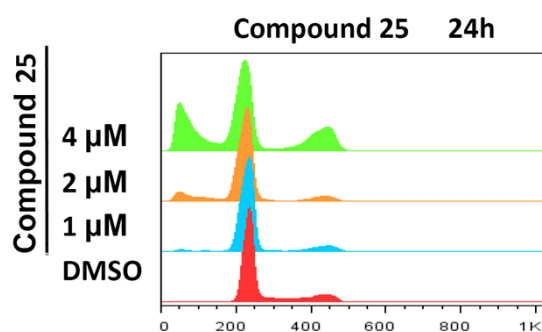

| Treatment                 | Cells (%)  |            |            |
|---------------------------|------------|------------|------------|
|                           | G0/G1      | S          | G2/M       |
| DMSO                      | 72.56±3.29 | 14.32±3.68 | 15.21±2.57 |
| Compound <b>25</b> (1 µM) | 76.21±1.35 | 2.32±0.24  | 8.43±0.85  |
| Compound <b>25</b> (2 µM) | 82.59±3.75 | 1.64±0.19  | 7.98±1.24  |
| Compound <b>25</b> (4 µM) | 60.15±4.29 | 1.18±0.31  | 11.08±1.23 |

**Fig. 2** Compound **25** induces S phase arrest in SMMC-7721 cells. (A) Cells were treated with 1, 2 and 4 µM of compound **25** for 24 h. Cell cycle was determined by PI staining and cell cytometry. (B) The percentages of cells in different phases were quantified. At least three independent experiments were performed and data of one representative experiment is shown.

## 6. <sup>1</sup>H-NMR and <sup>13</sup>C-NMR Spectral of New Compounds

### Compounds **3**

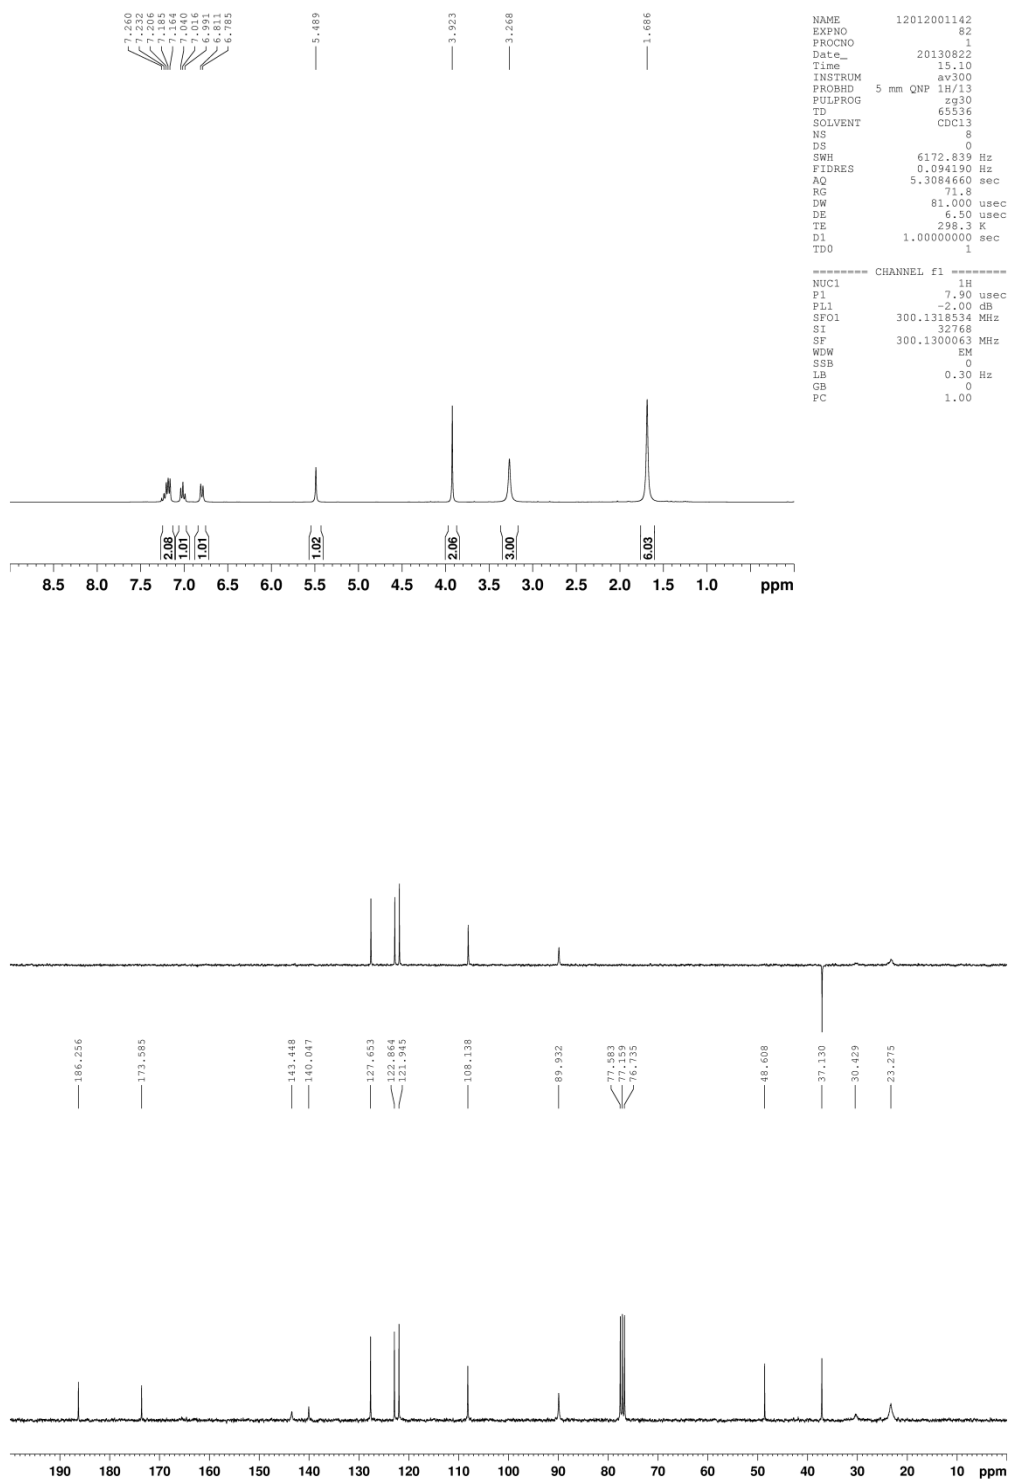

Compound 4

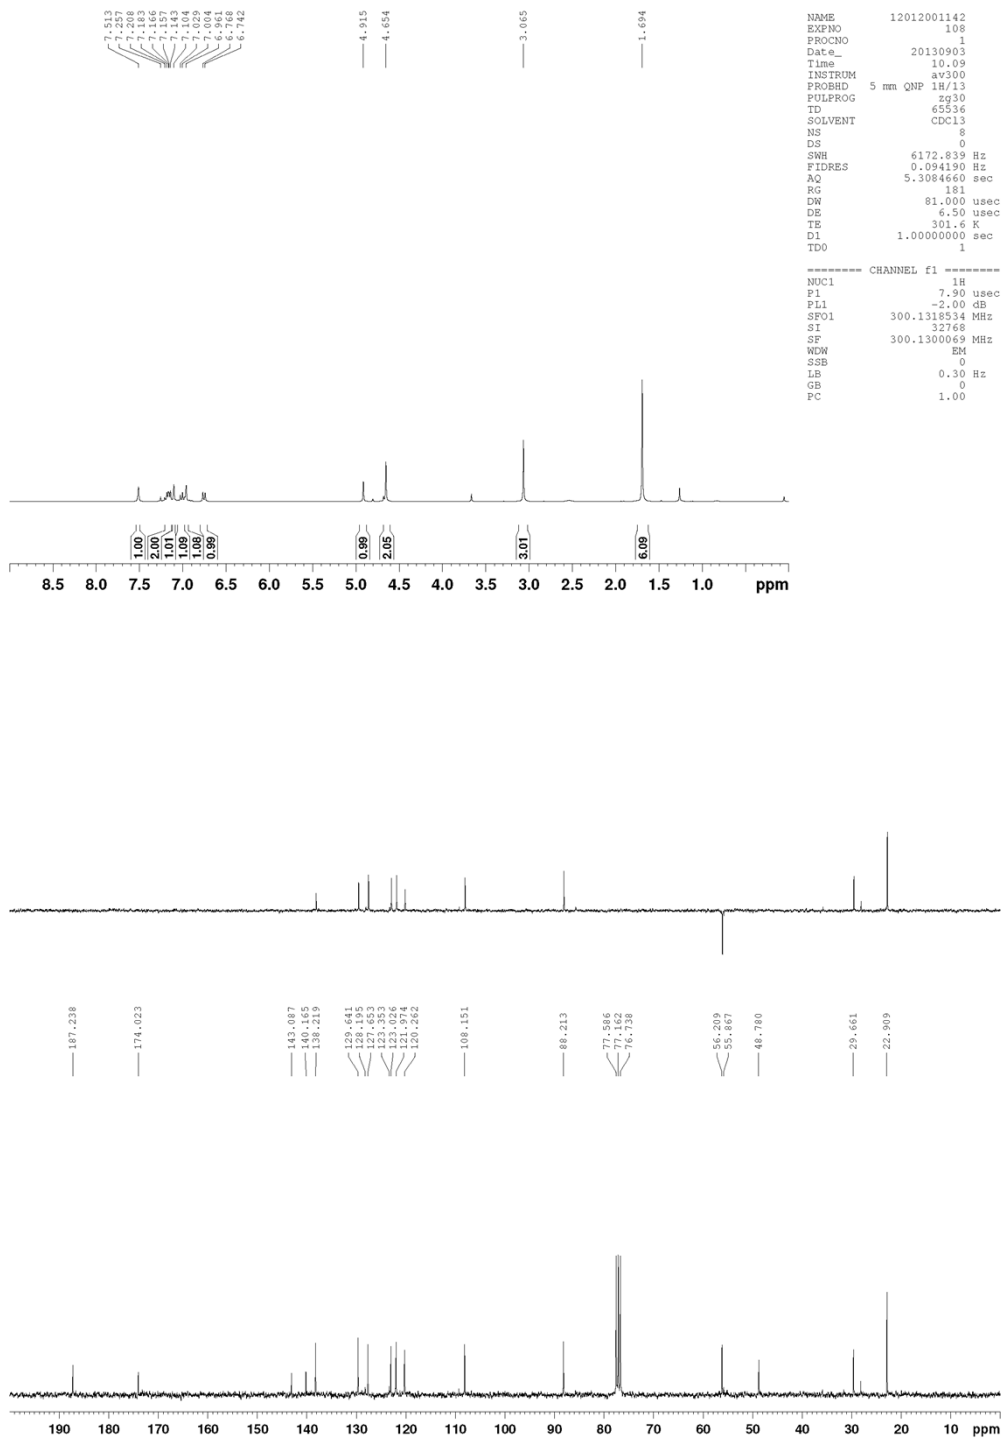

Compound 5



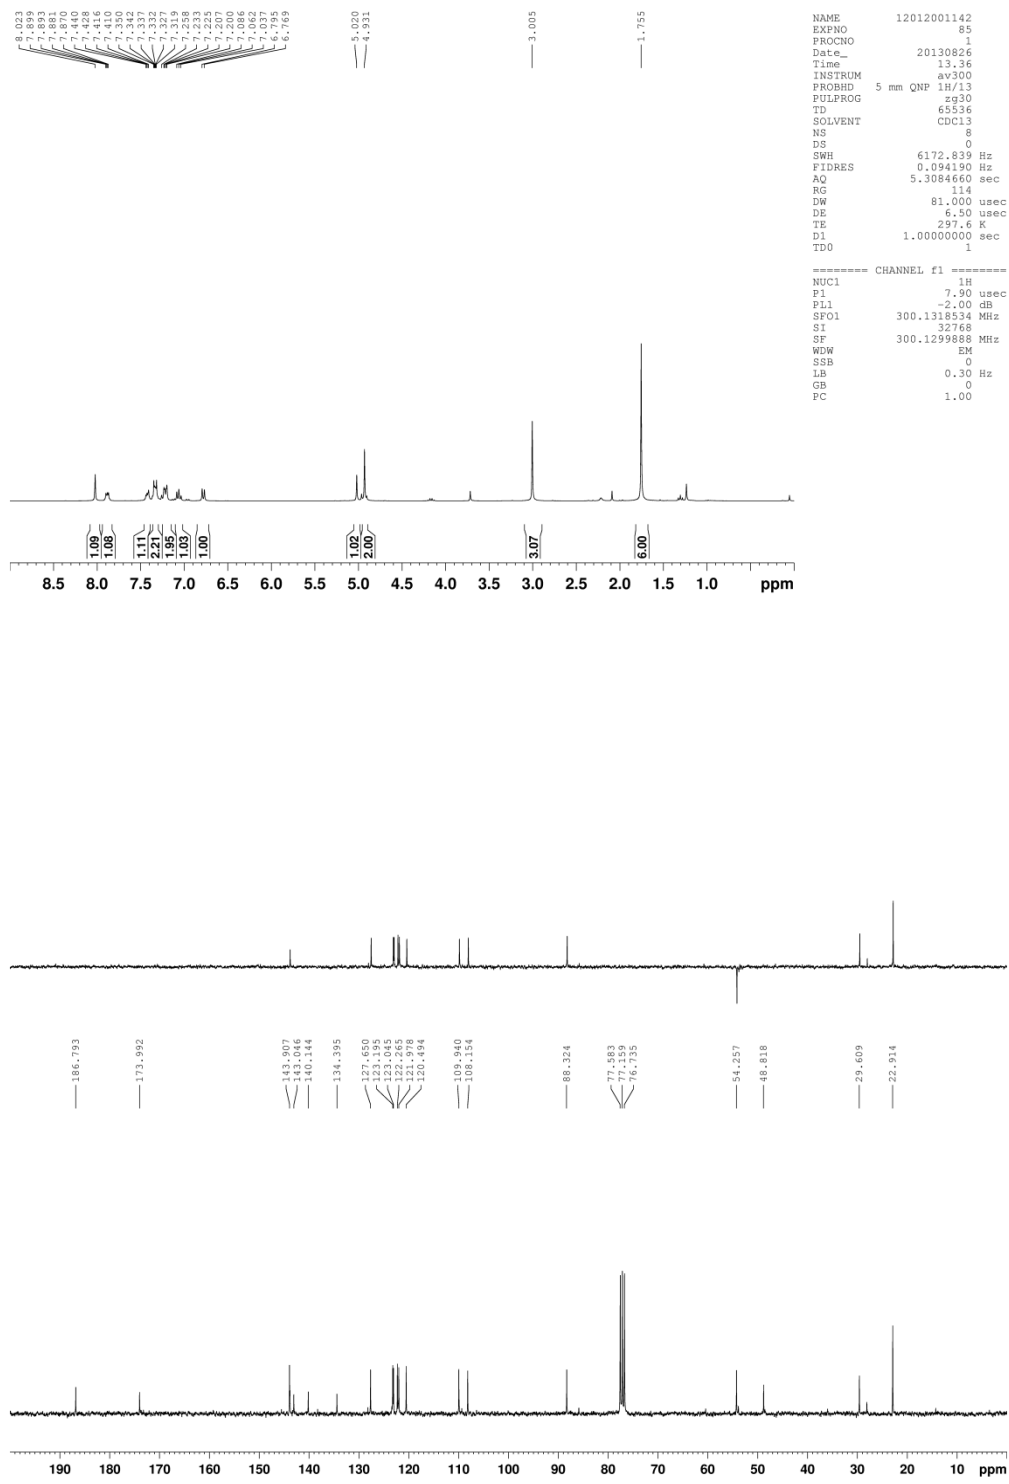

Compound 6

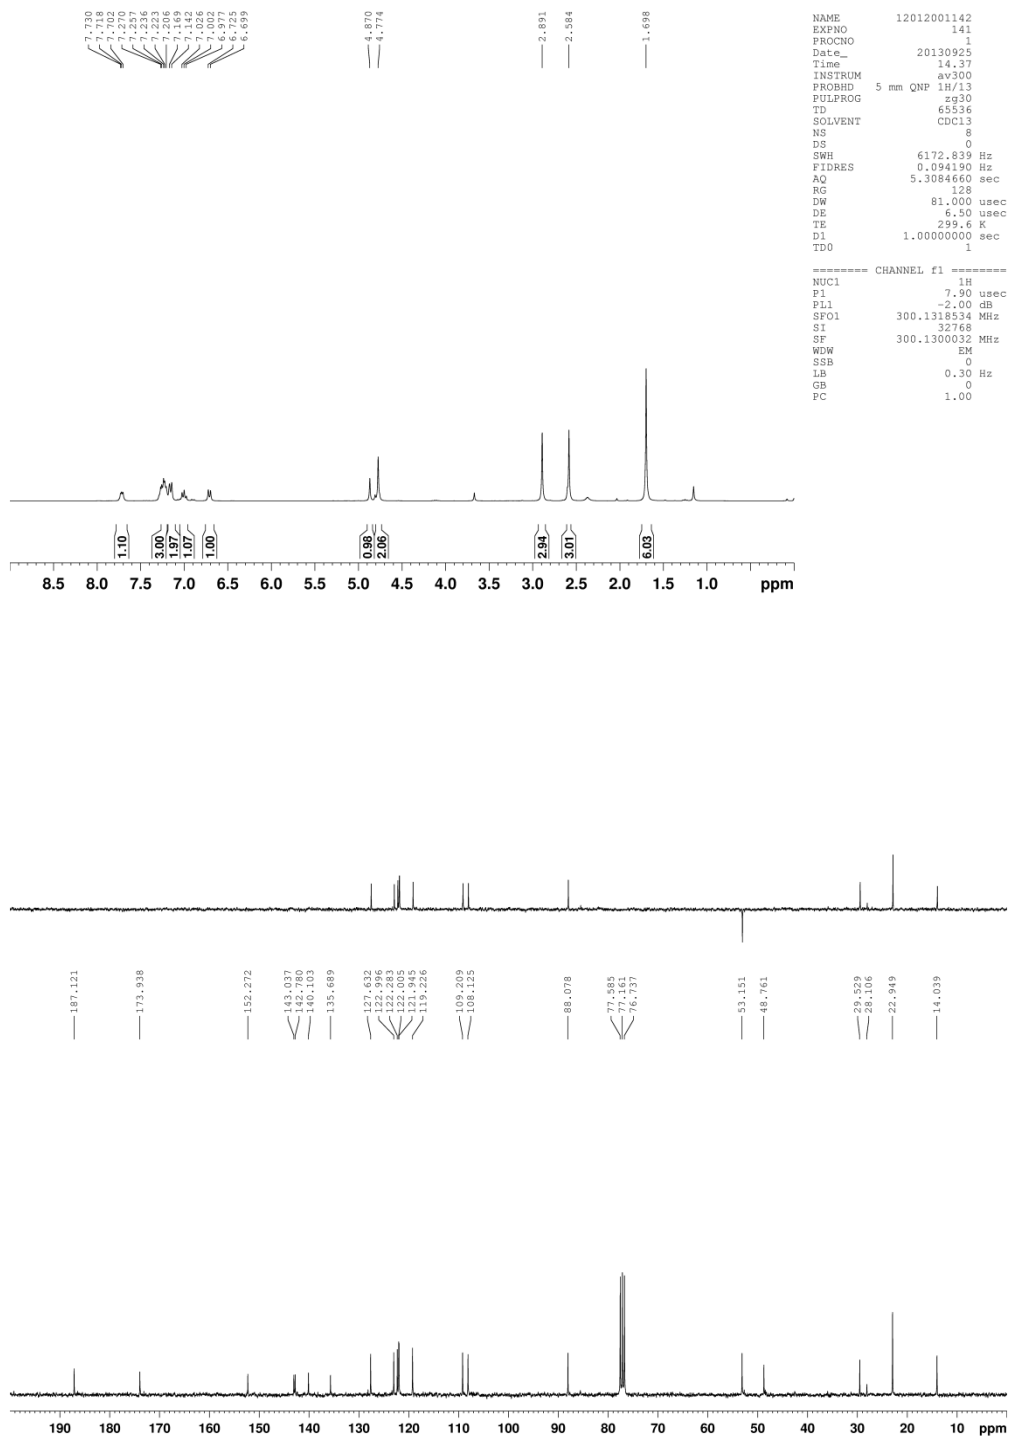

Compound 7

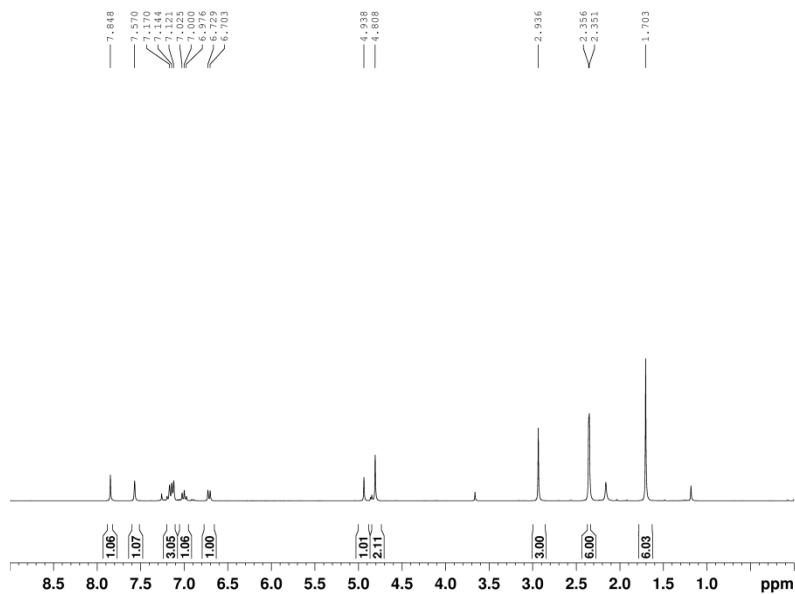

```

NAME      12012001142
EXPNO     121
PROCNO    1
Date_     20130916
Time      9.02
INSTRUM   av300
PROBHD    5 mm QNP 1H/13
PULPROG   zg30
TD         65536
SOLVENT   CDCl3
NS         8
DS         0
SWH        6172.839 Hz
FIDRES     0.094190 Hz
AQ         5.3084660 sec
RG         181
EM         81.000 usec
DE         6.50 usec
TE         300.4 K
D1         1.00000000 sec
TDO        1

```

```

===== CHANNEL f1 =====
NUC1      1H
P1        7.90 usec
PL1       -2.00 dB
SFO1      300.1318534 MHz
SI        32768
SF        300.1300063 MHz
WDW       EM
SSB       0
LB        0.30 Hz
GB        0
PC        1.00

```

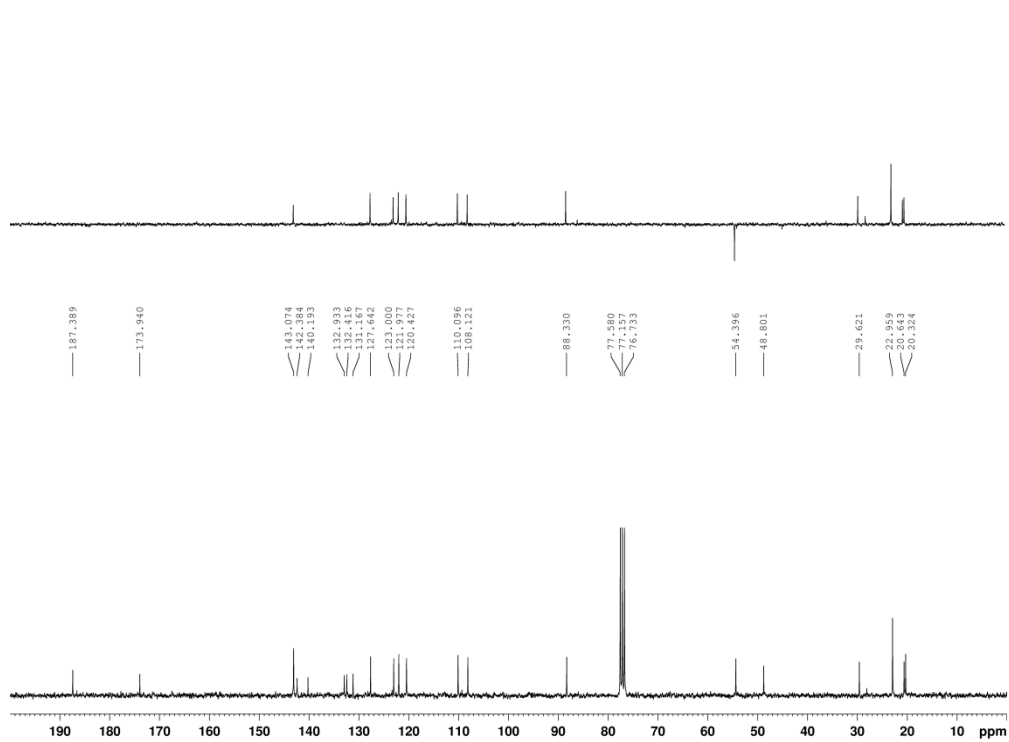

Compound 8

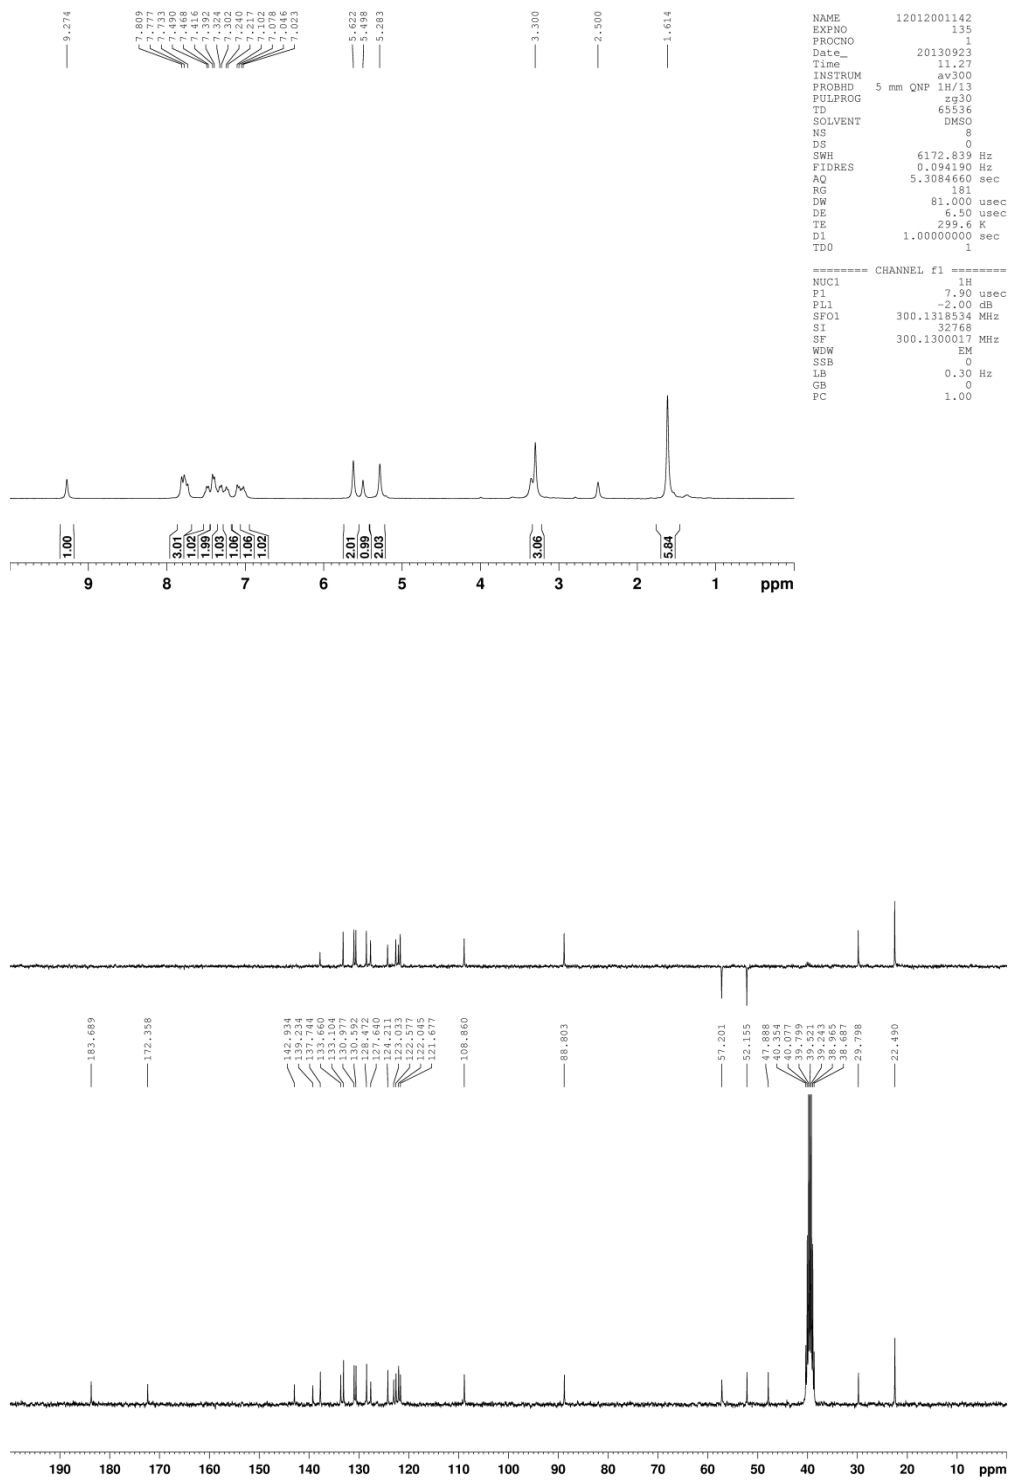

Compound 9

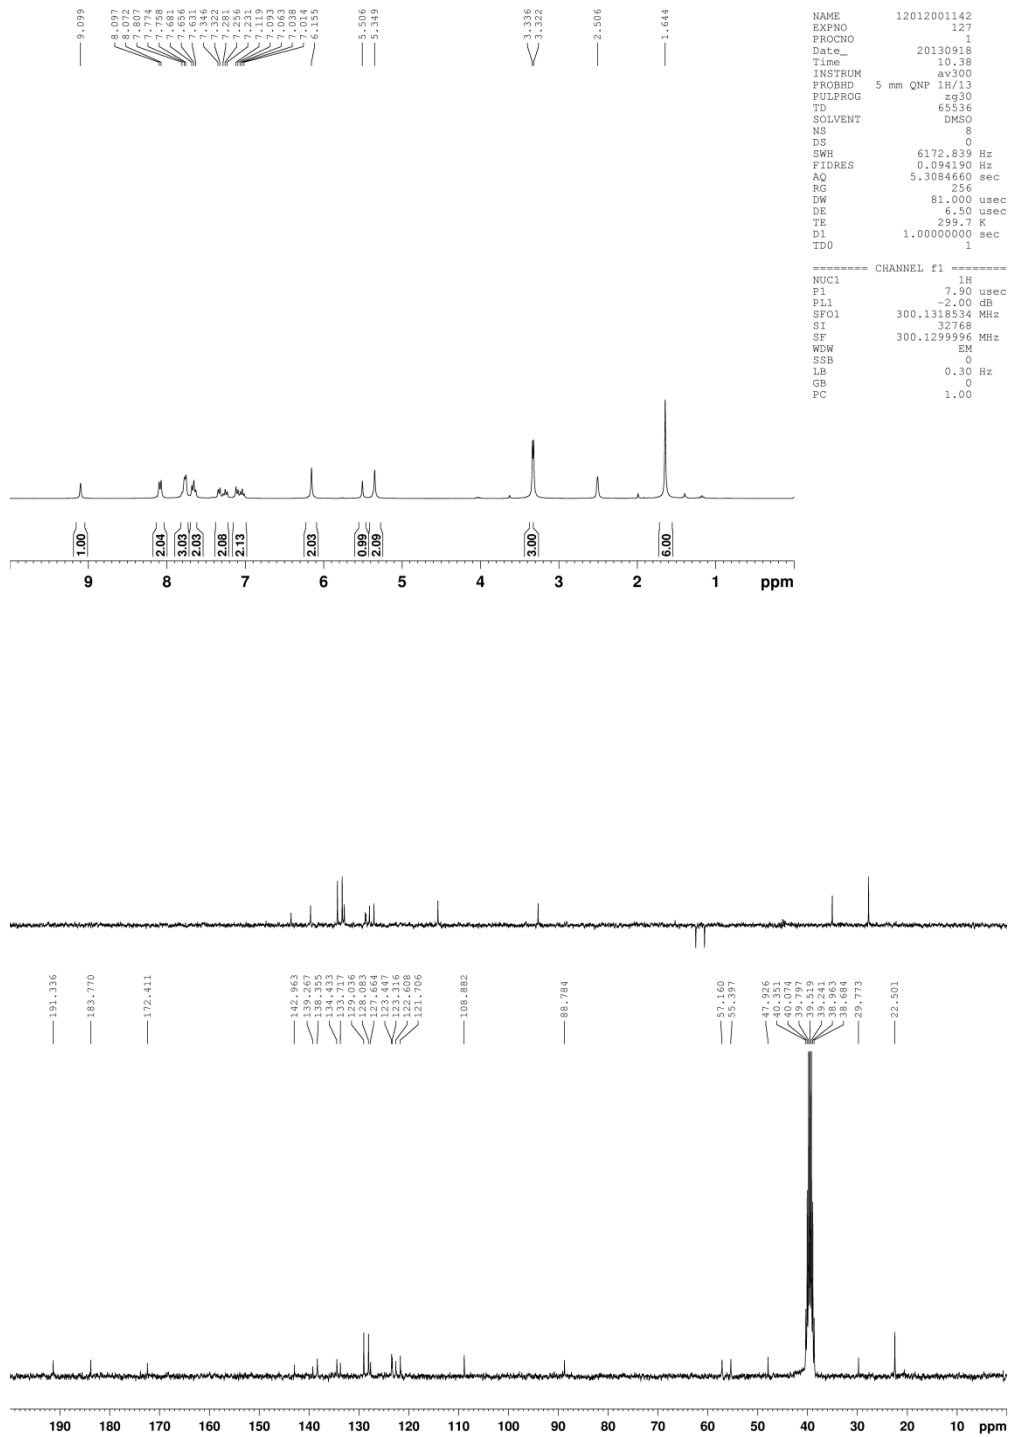

Compound 10

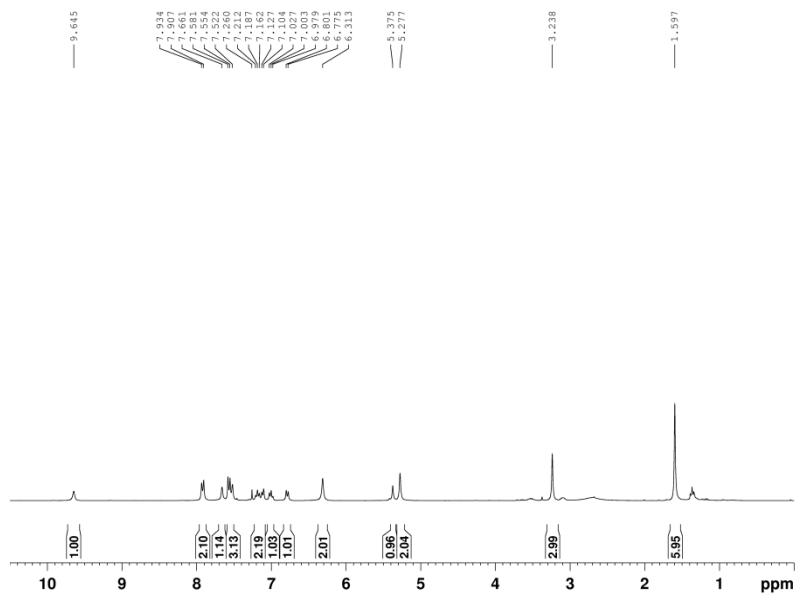

```

NAME      12012001142
EXPNO    146
PROCNO    1
Date_    20130929
Time     15.16
INSTRUM   av300
PROBHD   5 mm QNP 1H/13
PULPROG   zg30
TD       65536
SOLVENT   CDCl3
NS        8
DS        0
SWH       6172.839 Hz
FIDRES    0.094190 Hz
AQ        5.3084660 sec
RG        181
EM        81.000 usec
DE        6.50 usec
TE        300.1 K
D1        1.00000000 sec
TD0       1
===== CHANNEL f1 =====
NUC1      1H
P1        7.90 usec
PL1       -2.00 dB
SFO1     300.1318534 MHz
SI        32768
SF        300.1300065 MHz
WDW       EM
SSB       0
LB        0.30 Hz
GB        0
PC        1.00

```

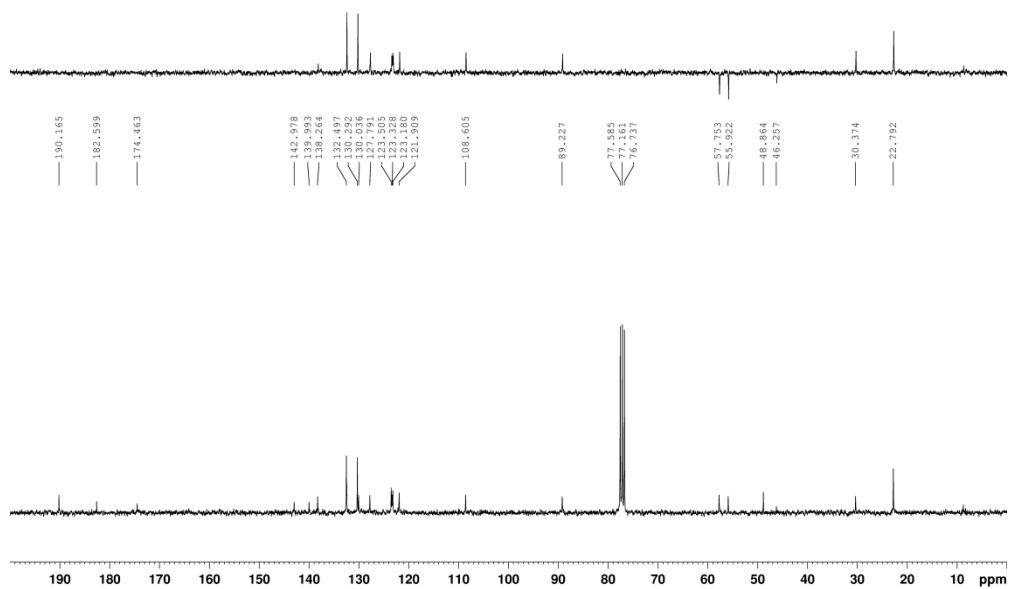

Compound 11

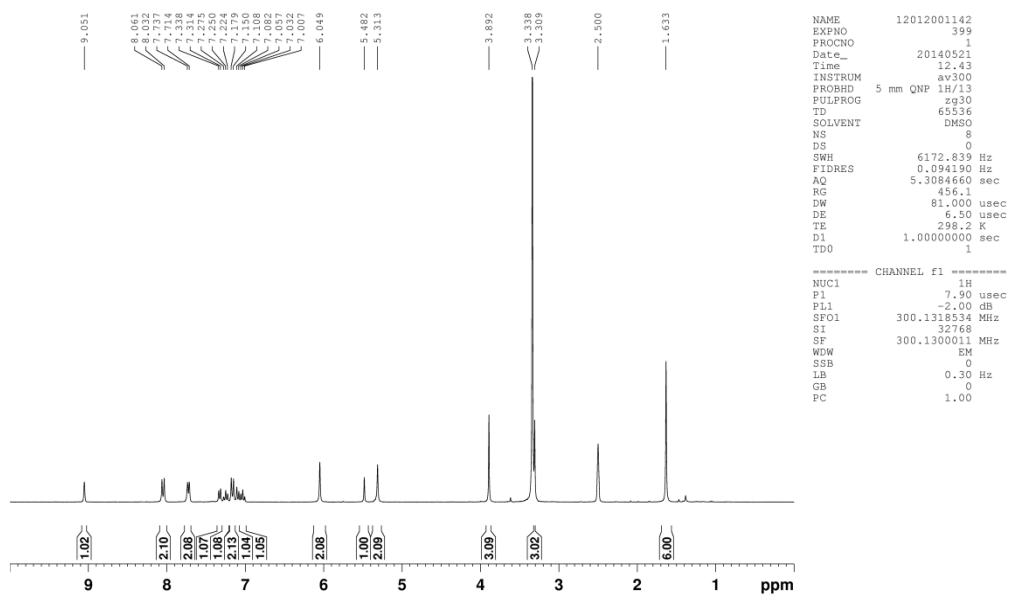

```

NAME      12012001142
EXPNO    399
PROCNO   1
Date_    20140521
Time     12.43
INSTRUM  av300
PROBHD   5 mm QNP 1H/13
PULPROG  zg30
TD       65536
SOLVENT  DMSO
NS       8
DS       0
SWH      6172.839 Hz
FIDRES   0.094190 Hz
AQ       5.3084660 sec
RG       456.1
DW       81.000 usec
DE       6.50 usec
TE       298.2 K
D1       1.00000000 sec
TD0      1

----- CHANNEL f1 -----
NUC1     1H
P1       7.90 usec
PL1     -2.00 dB
SFO1    300.1318534 MHz
SI       32768
SF       300.1300011 MHz
WDW      EM
SSB      0
LB       0.30 Hz
GB       0
PC       1.00

```

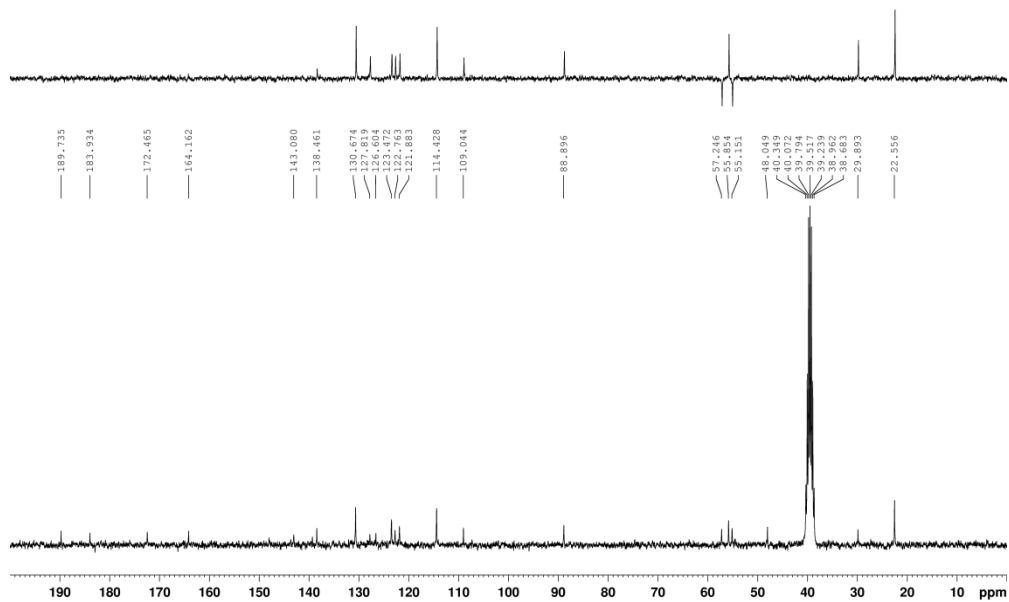

Compound 12

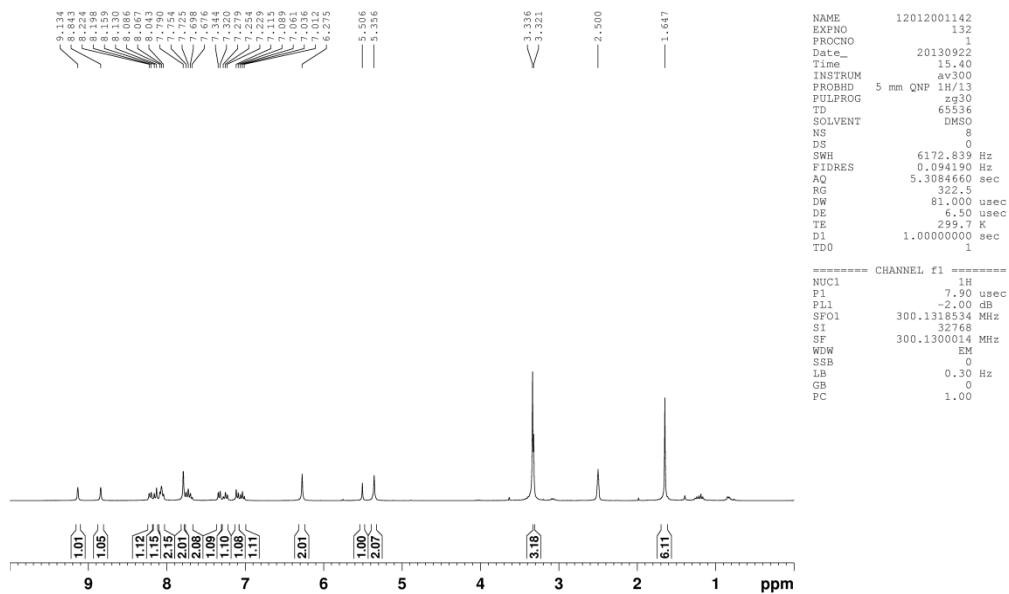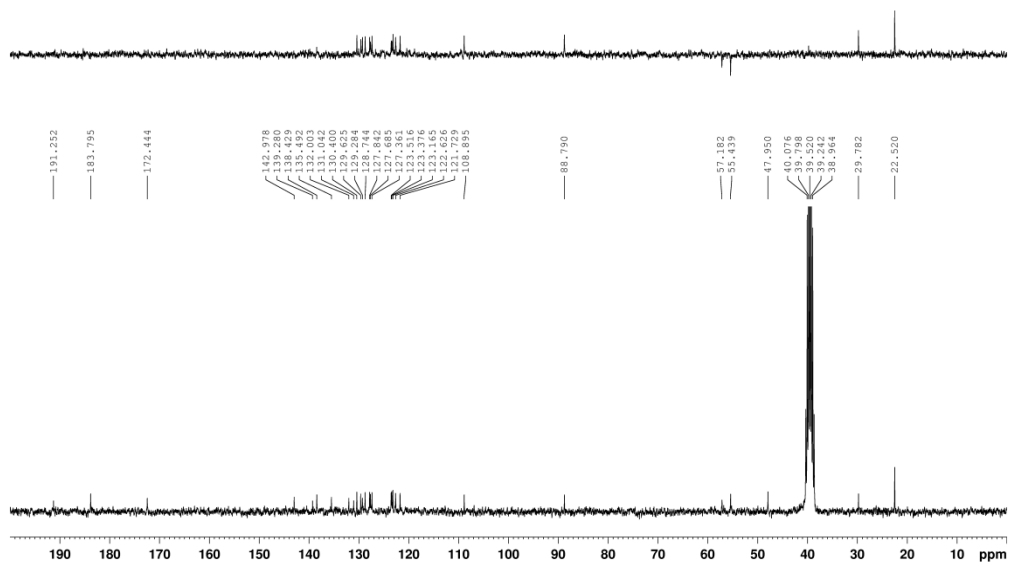

Compound 13



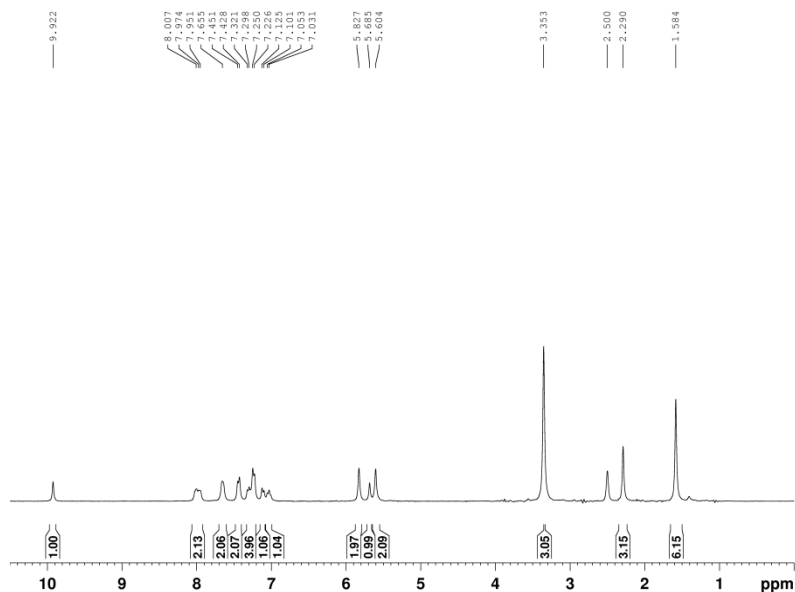

```

NAME      12012001142
EXPNO    152
PROCNO    1
Date_    20131009
Time     10.09
INSTRUM   av300
PROBHD    5 mm QNP 1H/13
PULPROG   zg30
TD        65536
SOLVENT    DMSO
NS         8
DS         0
SWH        6172.839 Hz
FIDRES     0.094190 Hz
AQ         5.3084660 sec
RG         228.1
EM         81.000 usec
DE         6.50 usec
TE         300.0 K
D1         1.00000000 sec
TD0        1

===== CHANNEL f1 =====
NUC1       1H
P1         7.90 usec
PL1        -2.00 dB
SFO1       300.1318534 MHz
SI         32768
SF         300.1300016 MHz
WDW        EM
SSB        0
LB         0.30 Hz
GB         0
PC         1.00

```

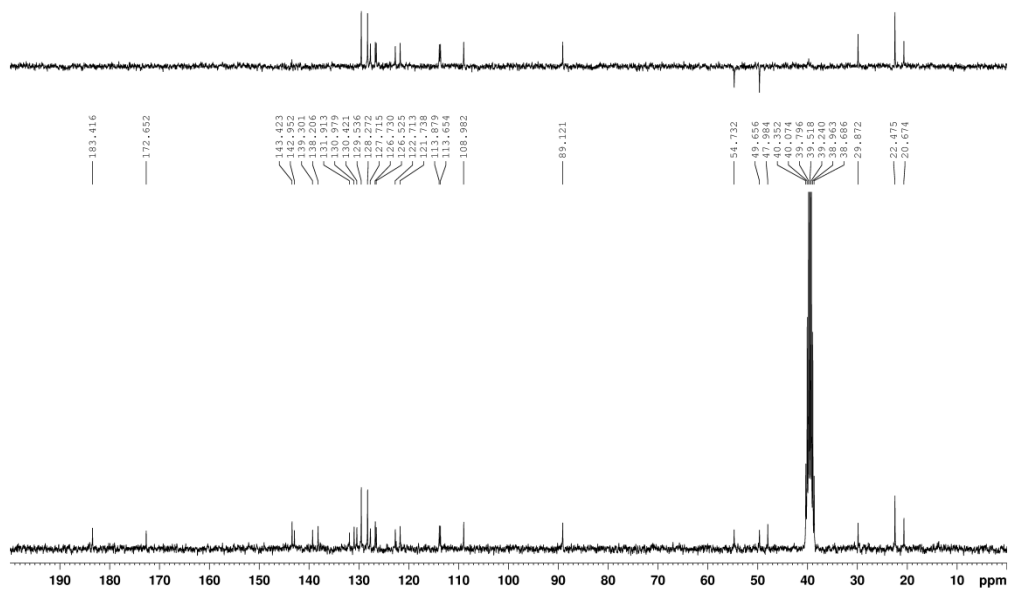

Compound 14

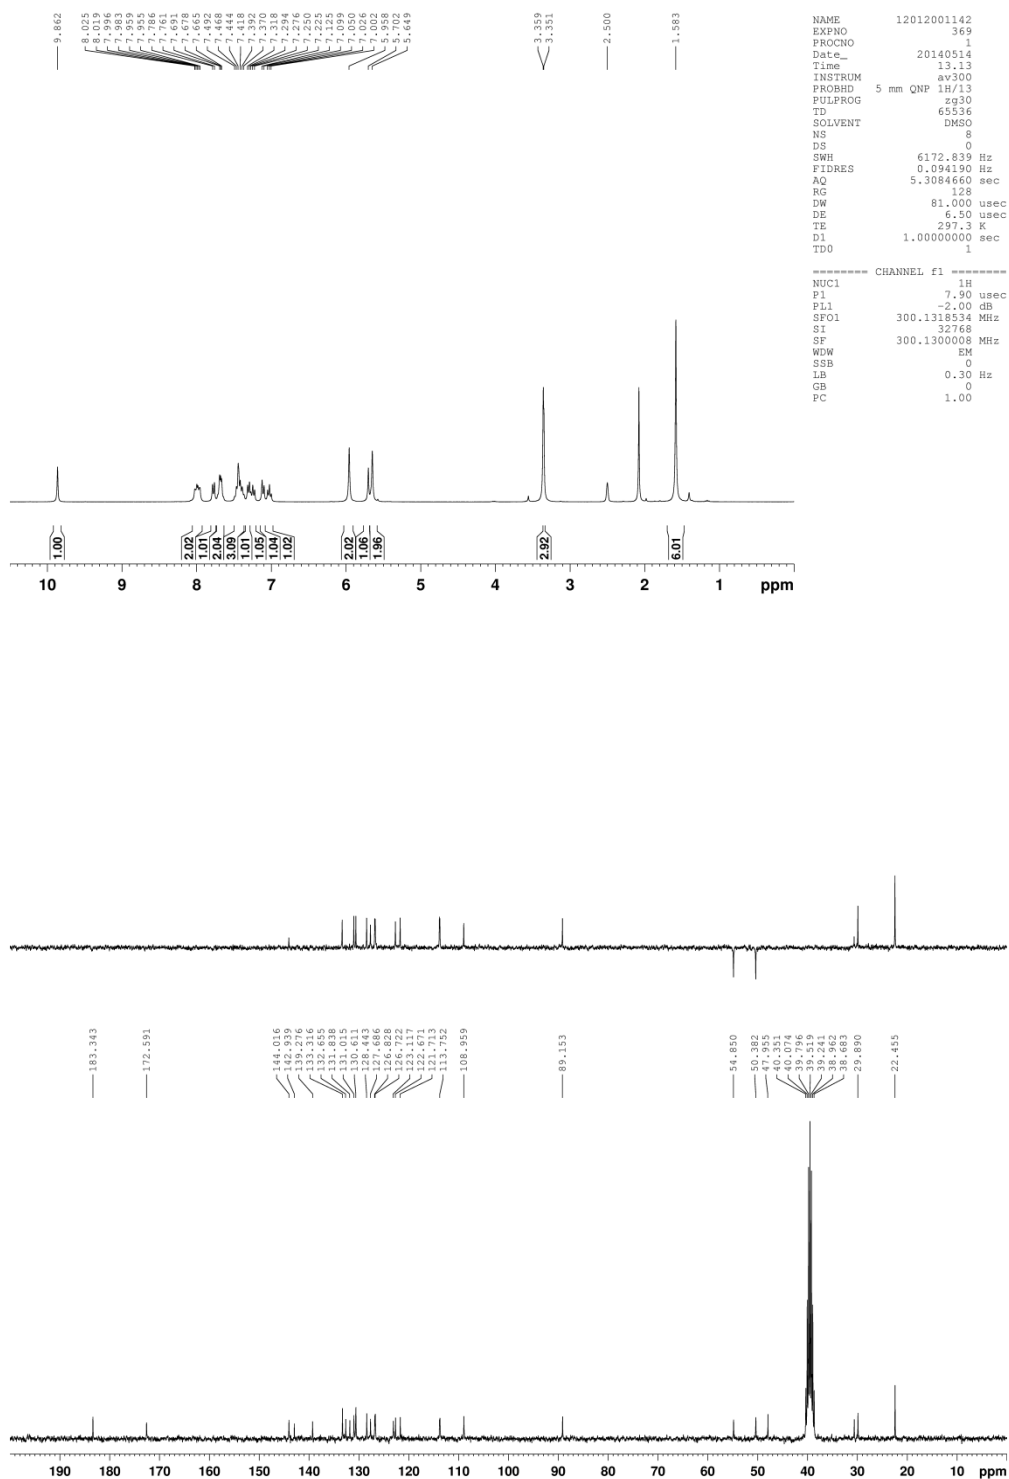

Compound 15

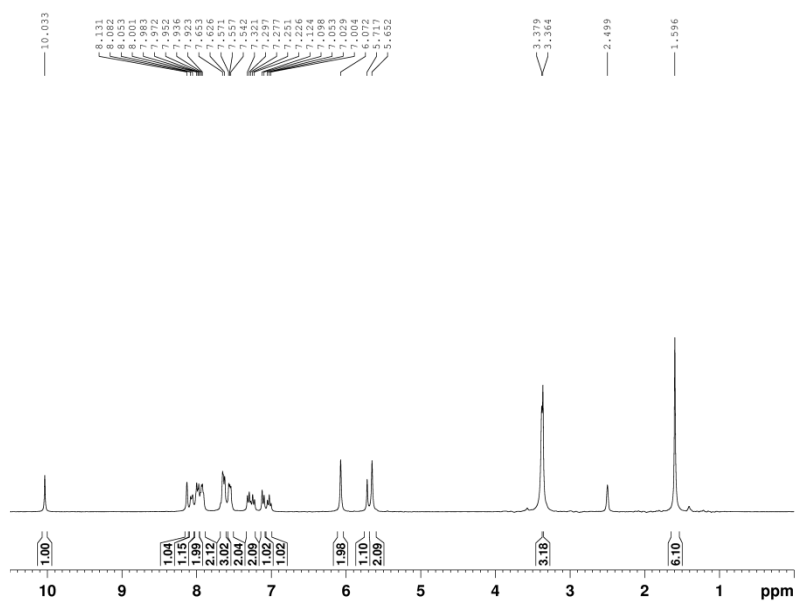

```

NAME      12012001142
EXPNO     149
PROCNO    1
Date_     20131008
Time      16.43
INSTRUM   av300
PROBHD    5 mm QNP 1H/13
PULPROG   zg30
TD         65536
SOLVENT   DMSO
NS         8
DS         0
SWH        6172.839 Hz
FIDRES     0.094190 Hz
AQ         5.3084660 sec
RG         161.3
DW         81.000 usec
DE         6.50 usec
TE         298.4 K
D1         1.00000000 sec
TD0        1
  
```

```

----- CHANNEL f1 -----
NUC1      1H
P1        7.90 usec
PL1       -2.00 dB
SFO1     300.1318534 MHz
SI        32768
SF        300.1300018 MHz
WDW       EM
SSB       0
LB        0.30 Hz
GB        0
PC        1.00
  
```

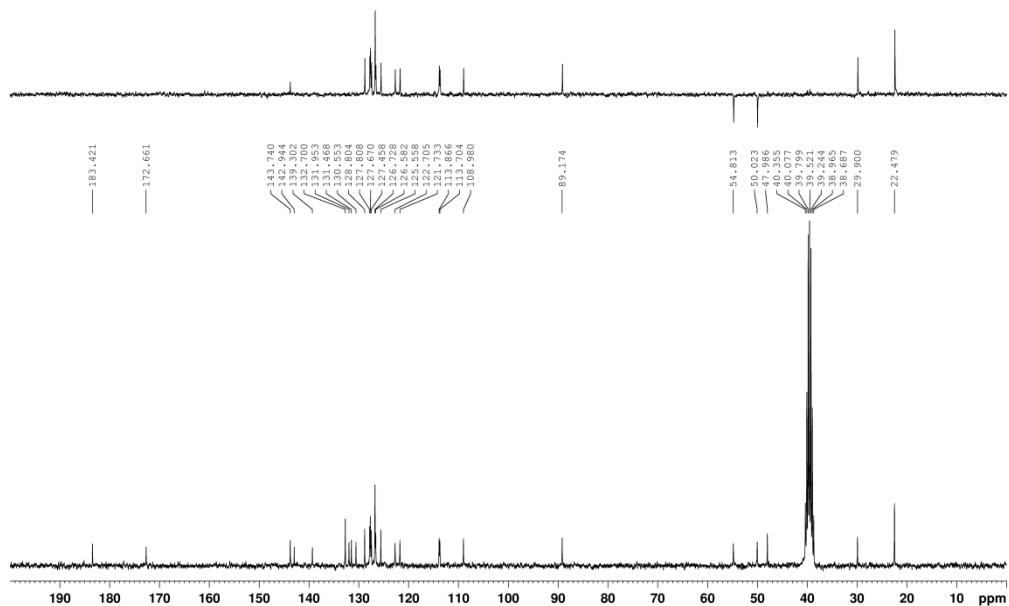

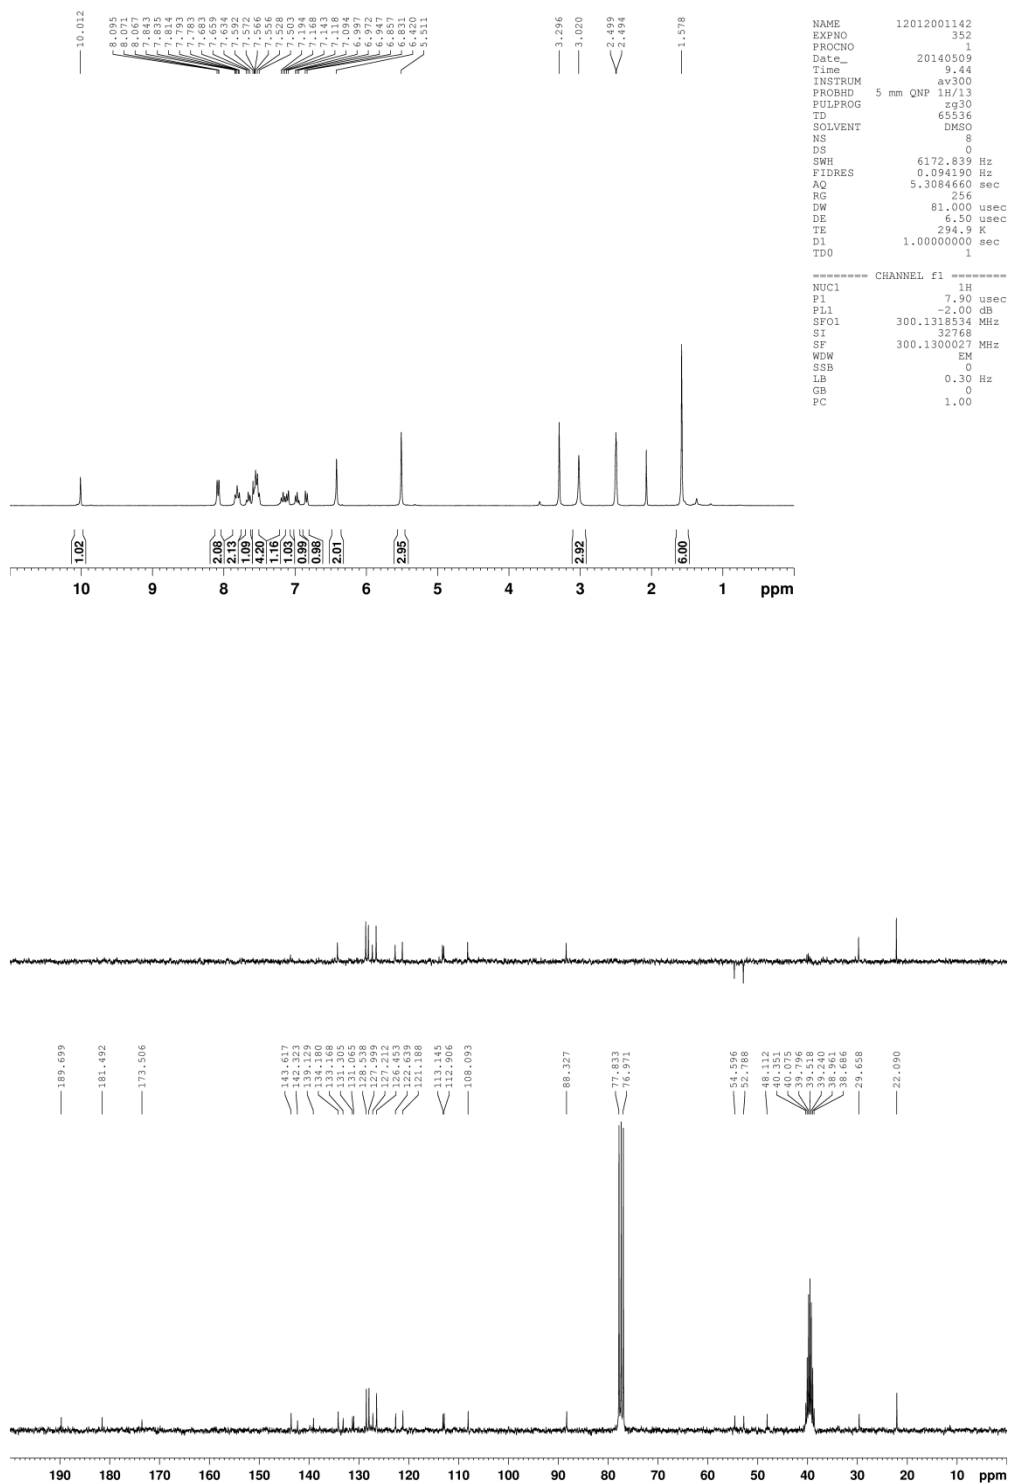

Compound 17

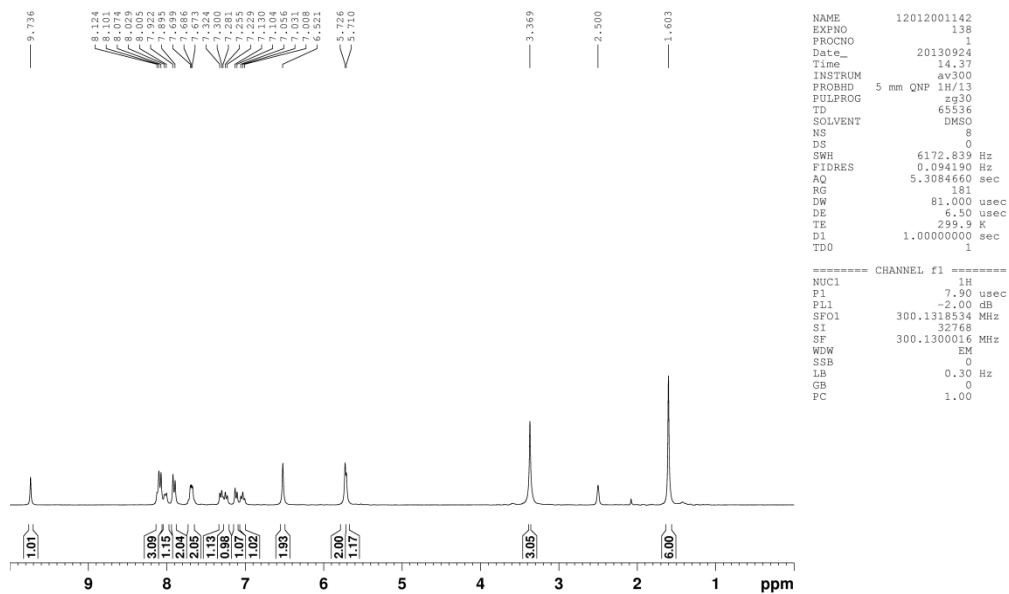

```

NAME      12012001142
EXPNO    138
PROCNO    1
Date_    20130924
Time     14.37
INSTRUM   av300
PROBHD    5 mm QNP 1H/13
PULPROG   zg30
TD        65536
SOLVENT   DMSO
NS         8
DS         0
SWH       6172.839 Hz
FIDRES    0.094190 Hz
AQ        5.3084660 sec
RG         181
EM        81.000 usec
DE        6.50 usec
TE        299.9 K
D1        1.0000000 sec
TD0       1
===== CHANNEL f1 =====
NUC1      1H
P1        7.90 usec
PL1       -2.00 dB
SFO1     300.1318534 MHz
SI        32768
SF        300.1300016 MHz
WDW       EM
SSB       0
LB        0.30 Hz
GB        0
PC        1.00

```

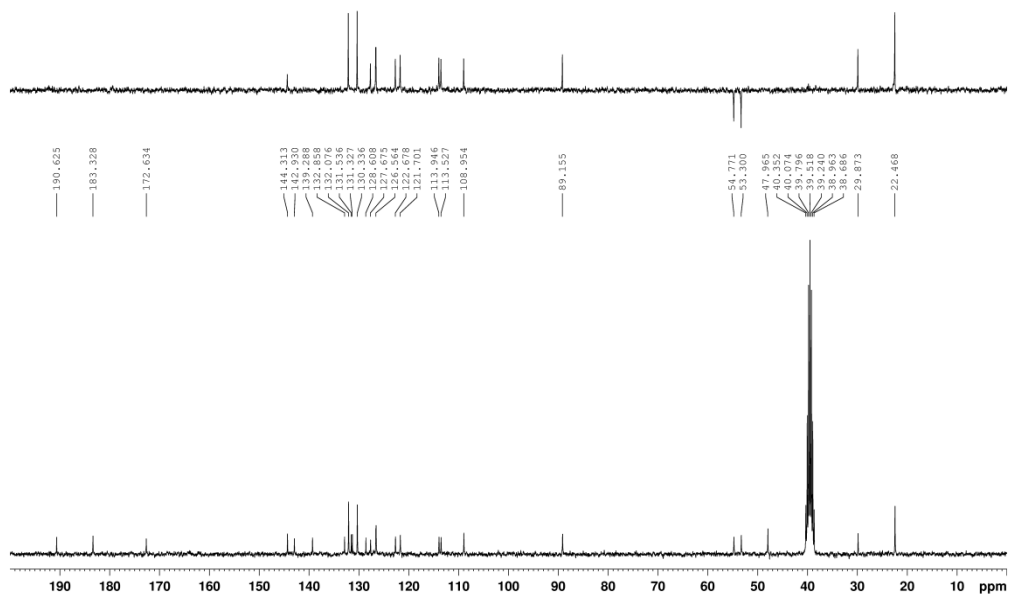

Compound 18

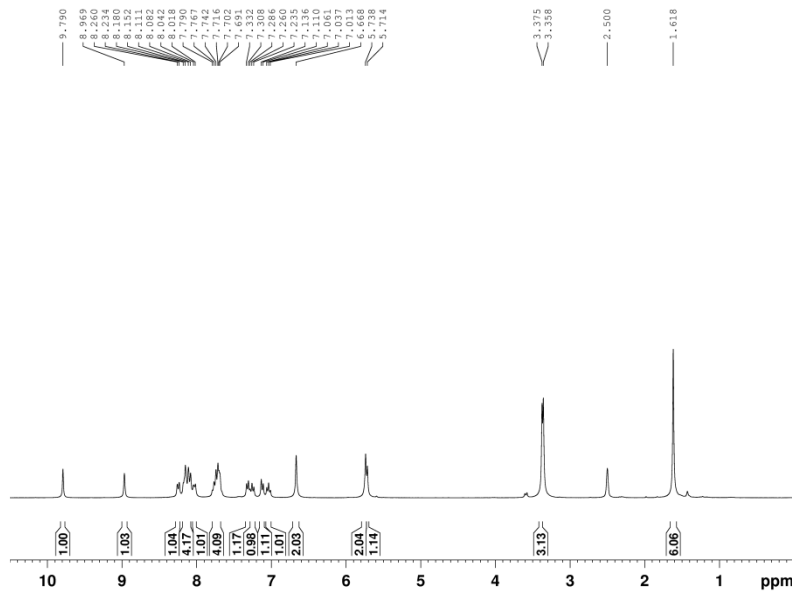

```

NAME      12012001142
EXPNO     1
PROCNO    1
Date_     20130904
Time      14.37
INSTRUM   av300
PROBHD    5 mm QNP 1H/13
PULPROG   zg30
TD         65536
SOLVENT   DMSO
NS         8
DS         0
SWH        6172.839 Hz
FIDRES     0.094190 Hz
AQ         5.3084660 sec
RG         228.1
DW         81.000 usec
DE         6.50 usec
TE         298.8 K
D1         1.00000000 sec
TD0        1
----- CHANNEL f1 -----
NUC1       1H
P1         7.90 usec
PL1        -2.00 dB
SFO1       300.1318534 MHz
SI         32768
SF         300.1300014 MHz
WDW        EM
SSB        0
LB         0.30 Hz
GB         0
PC         1.00

```

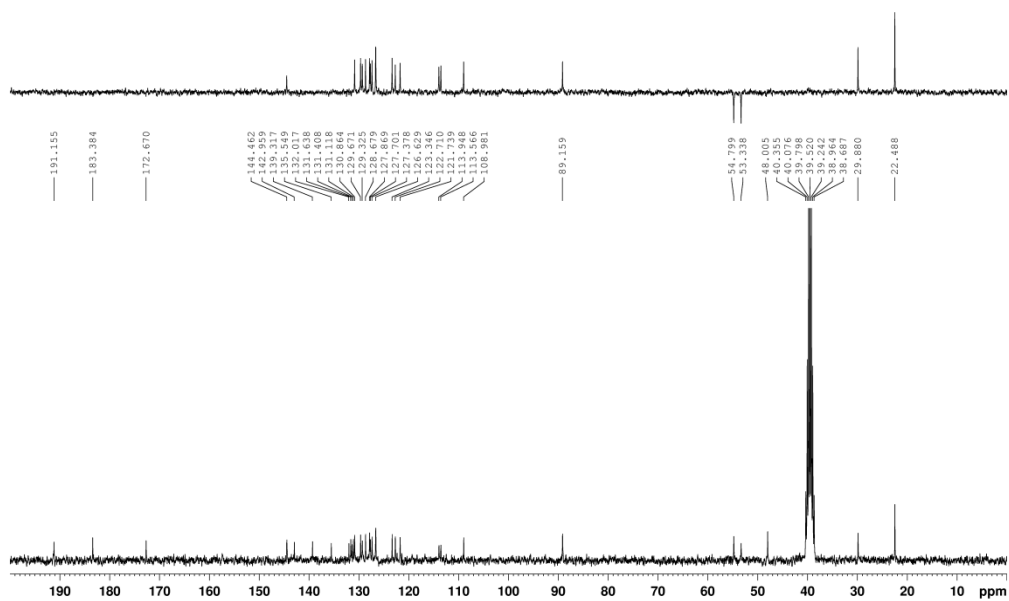

Compound 19

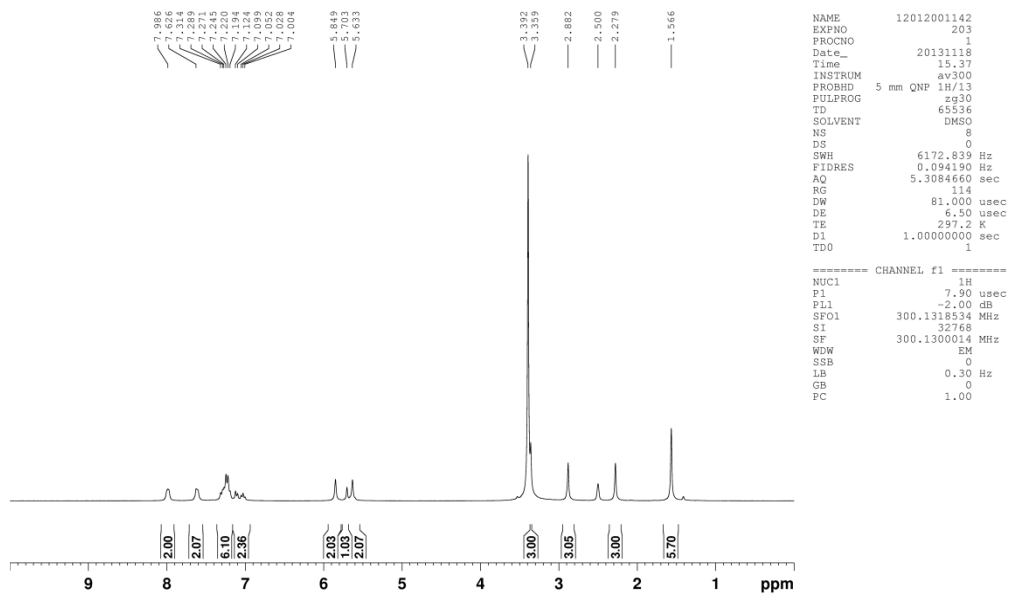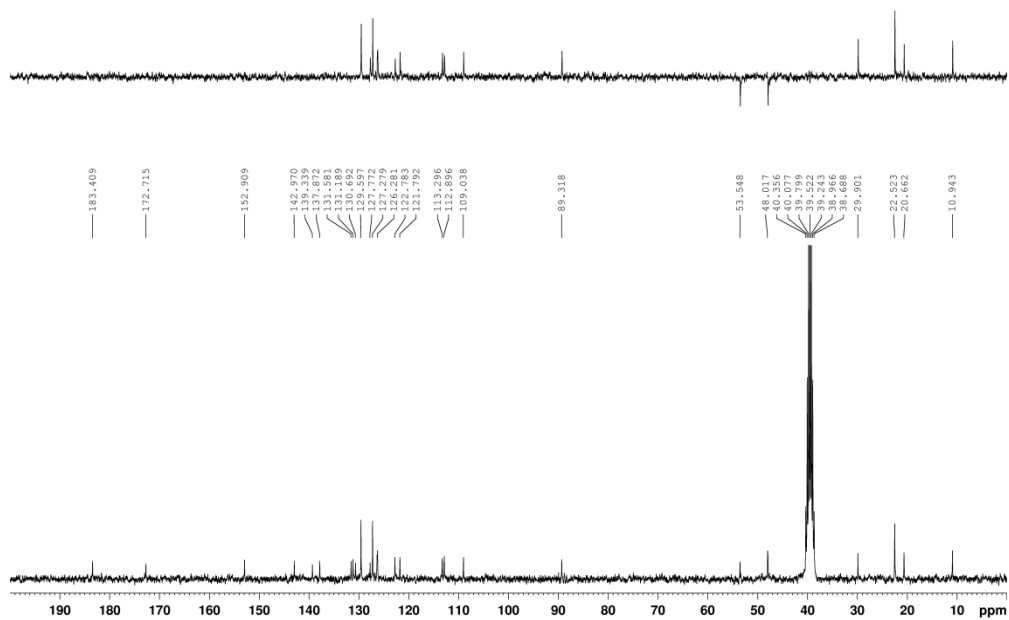

Compound 20

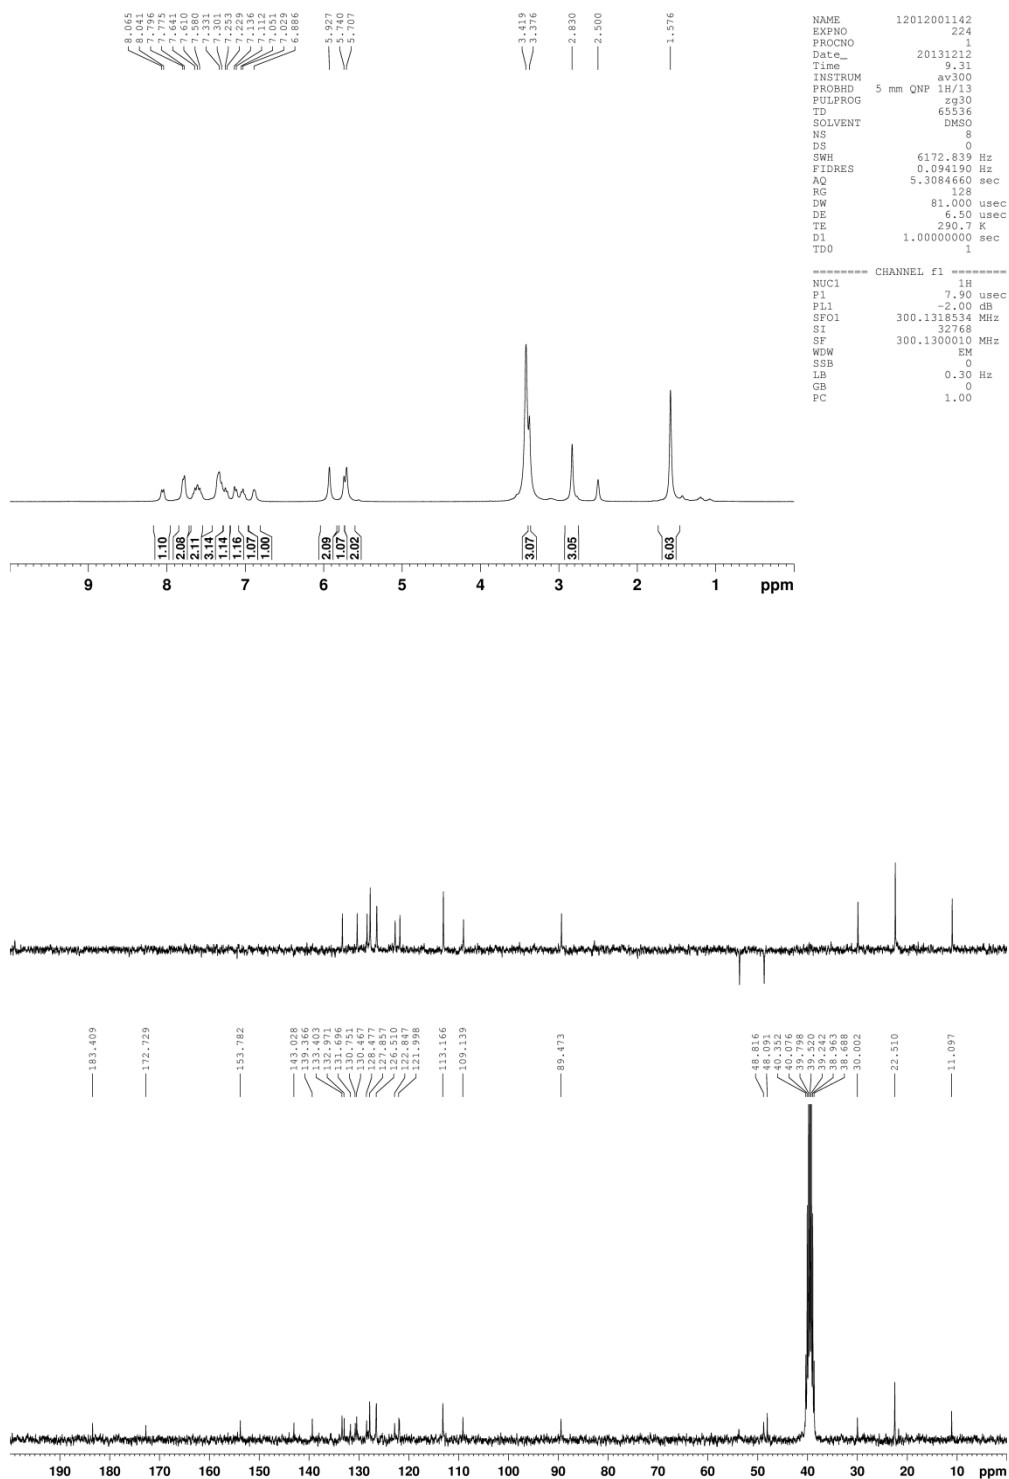

Compound 21



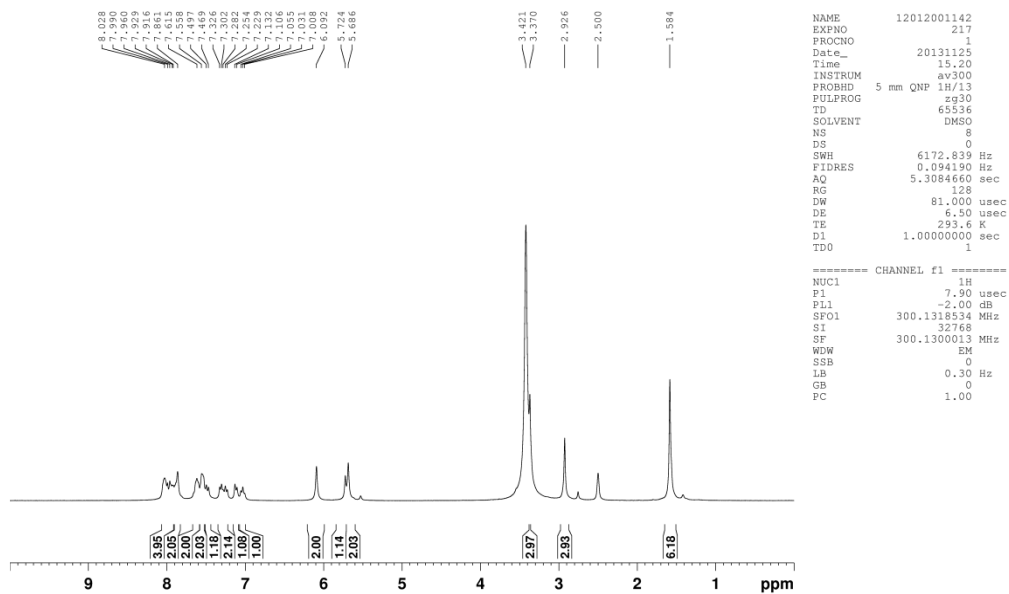

```

NAME      12012001142
EXPNO    217
PROCNO    1
Date_    20131125
Time     15.20
INSTRUM   av300
PROBHD   5 mm QNP 1H/13
PULPROG   zg30
TD       65536
SOLVENT   DMSO
NS        8
DS        0
SWH       6172.839 Hz
FIDRES    0.094190 Hz
AQ        5.3084660 sec
RG        128
EM        81.000 usec
DE        6.50 usec
TE        293.6 K
D1        1.00000000 sec
TDO       1
===== CHANNEL f1 =====
NUC1      1H
P1        7.90 usec
PL1       -2.00 dB
SFO1      300.1318534 MHz
SI        32768
SF        300.1300013 MHz
WDW       EM
SSB       0
LB        0.30 Hz
GB        0
PC        1.00
  
```

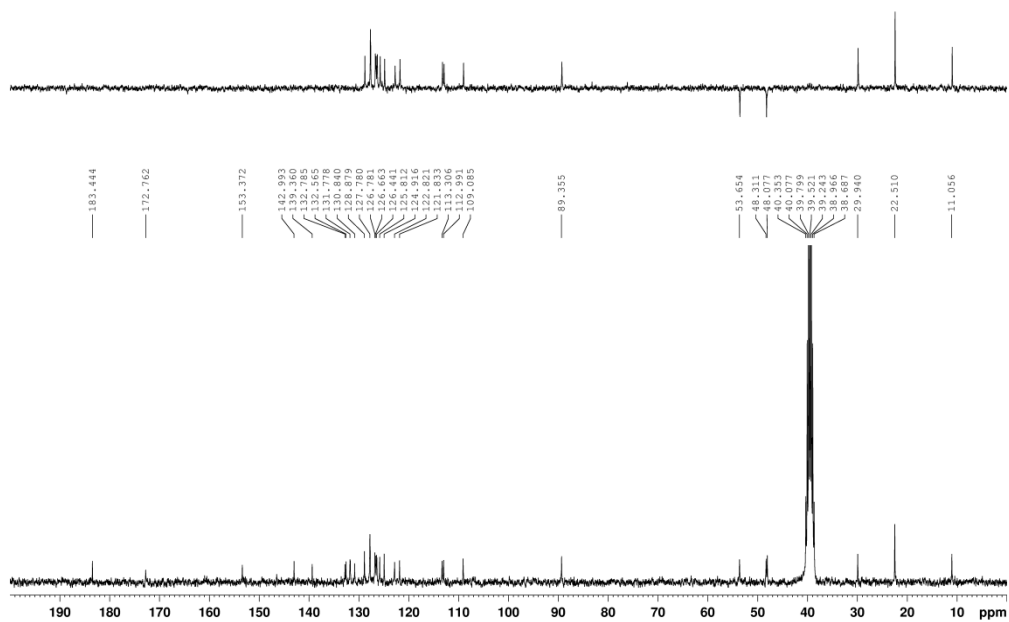

Compound 22

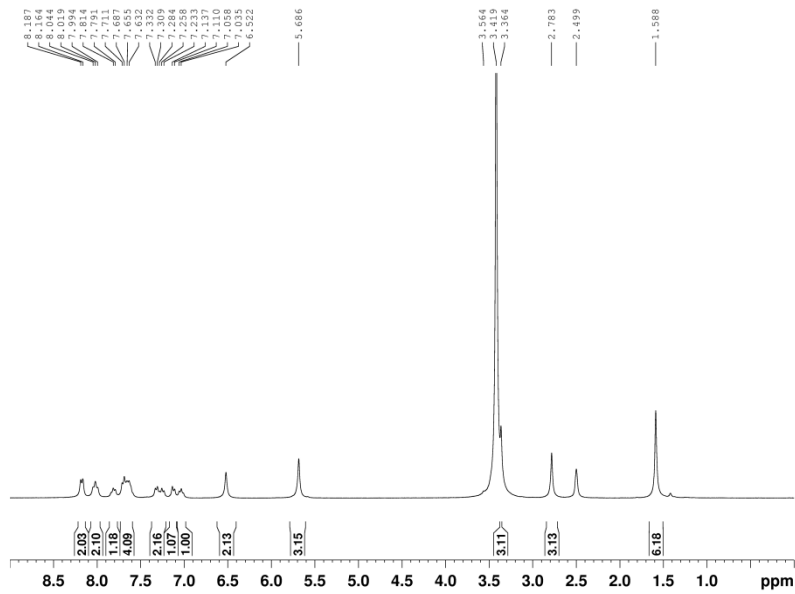

```

NAME      12012001142
EXPNO     240
PROCNO    1
Date_     20140102
Time      9.25
INSTRUM   av300
PROBHD    5 mm QNP 1H/13
PULPROG   zg30
TD         65536
SOLVENT   DMSO
NS         8
DS         0
SWH        6172.839 Hz
FIDRES     0.094190 Hz
AQ         5.3084660 sec
RG         181
DW         81.000 usec
DE         6.50 usec
TE         290.2 K
D1         1.00000000 sec
TD0        1

----- CHANNEL f1 -----
NUC1       1H
P1         7.90 usec
PL1        -2.00 dB
SFO1       300.1318534 MHz
SI         32768
SF         300.1300014 MHz
WDW        EM
SSB        0
LB         0.30 Hz
GB         0
PC         1.00

```

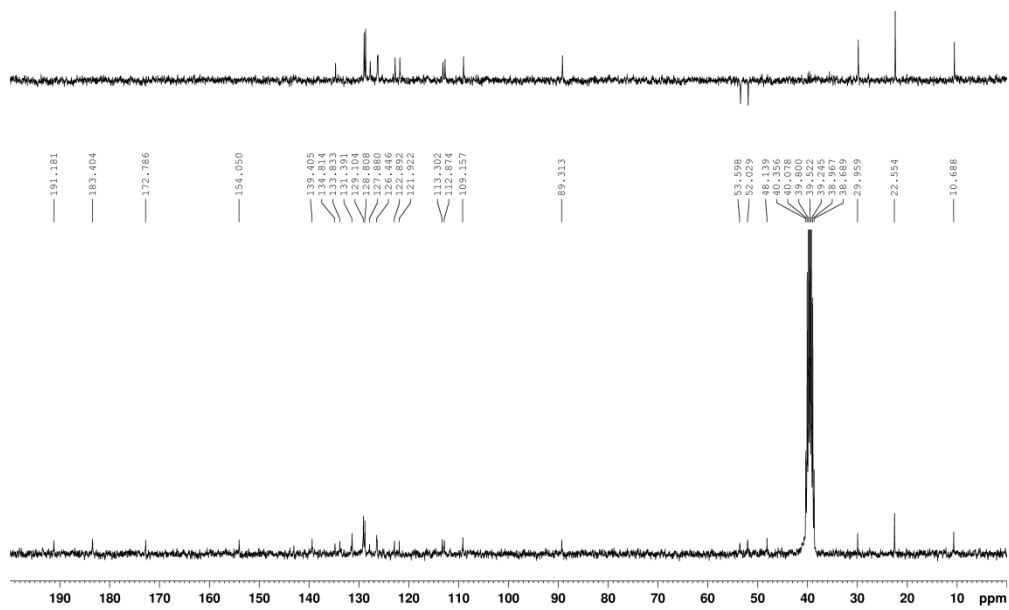

Compound 23

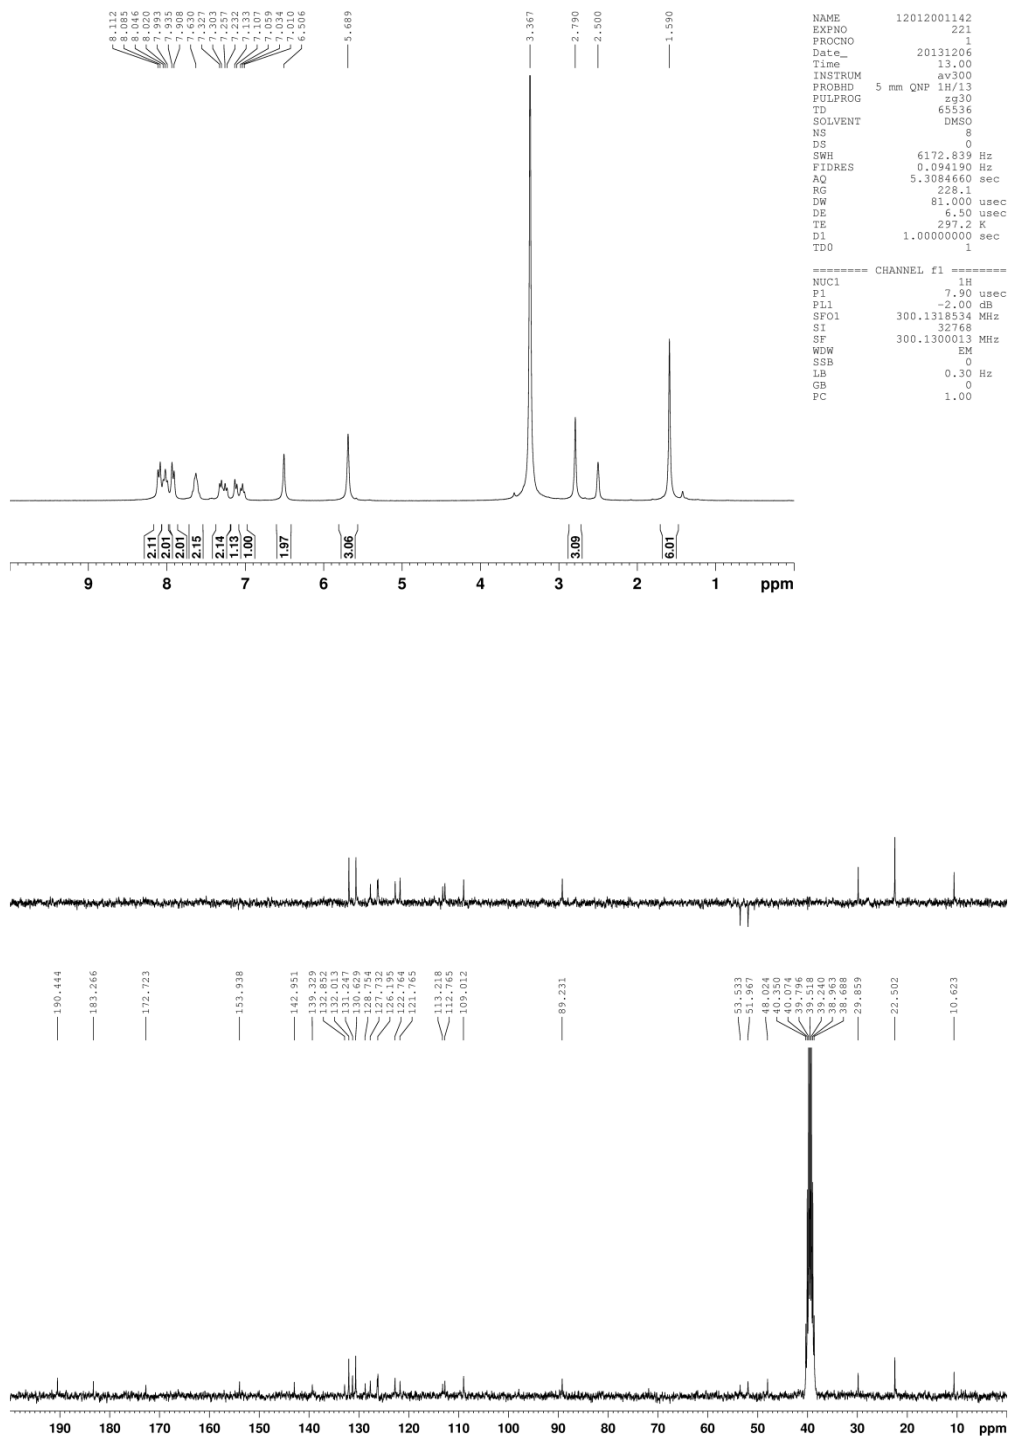

Compound 24

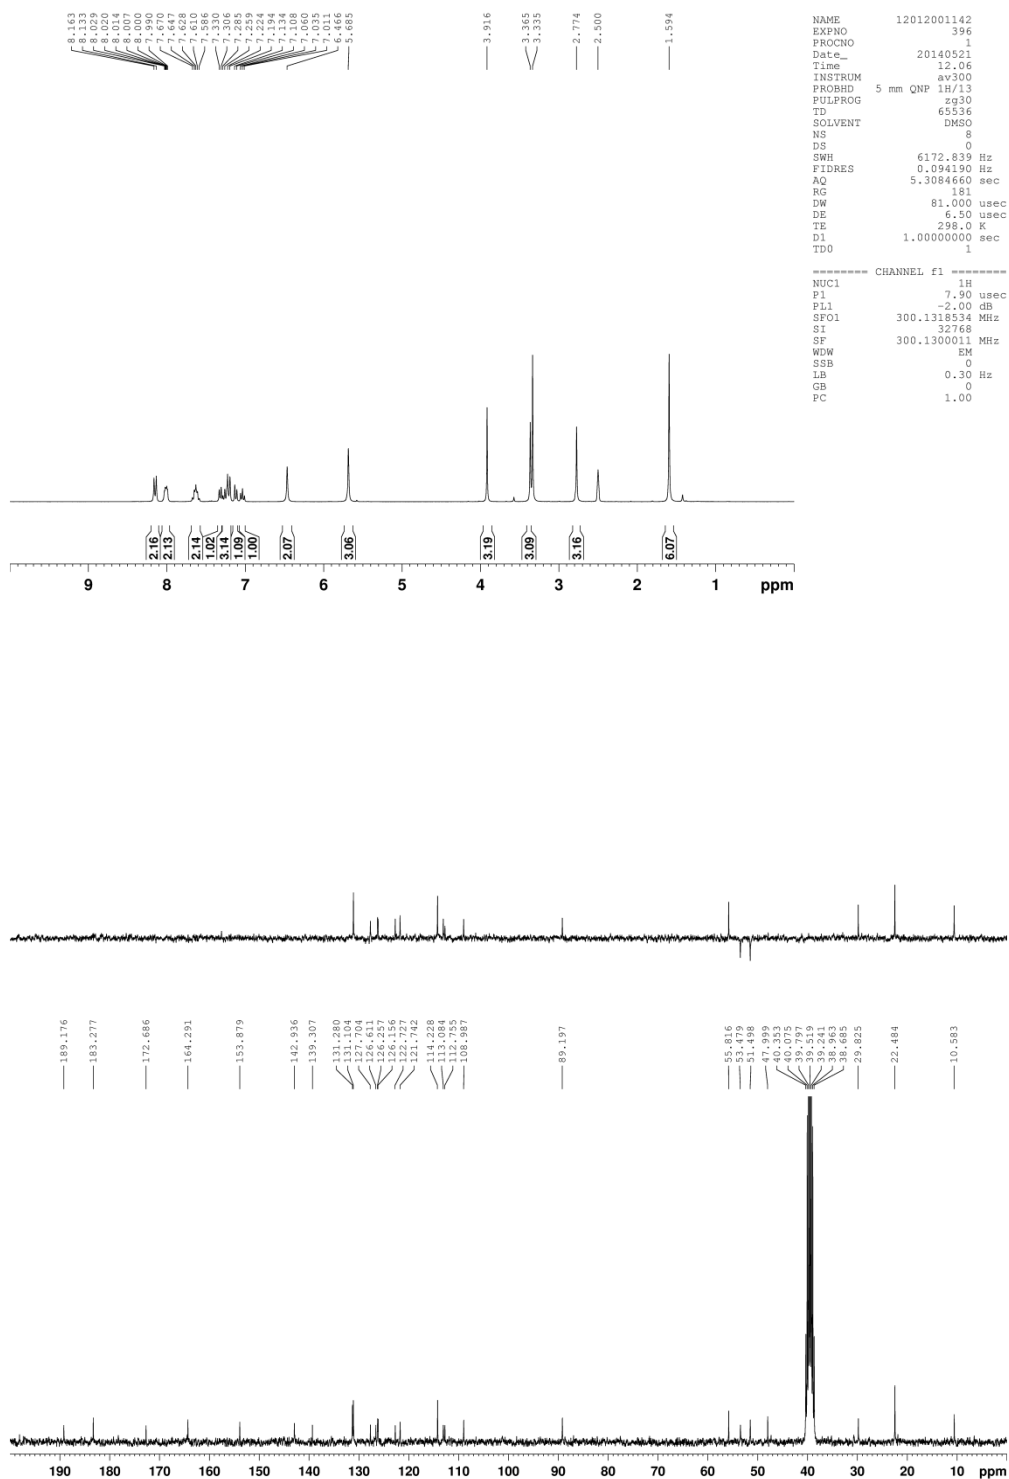

Compound 25

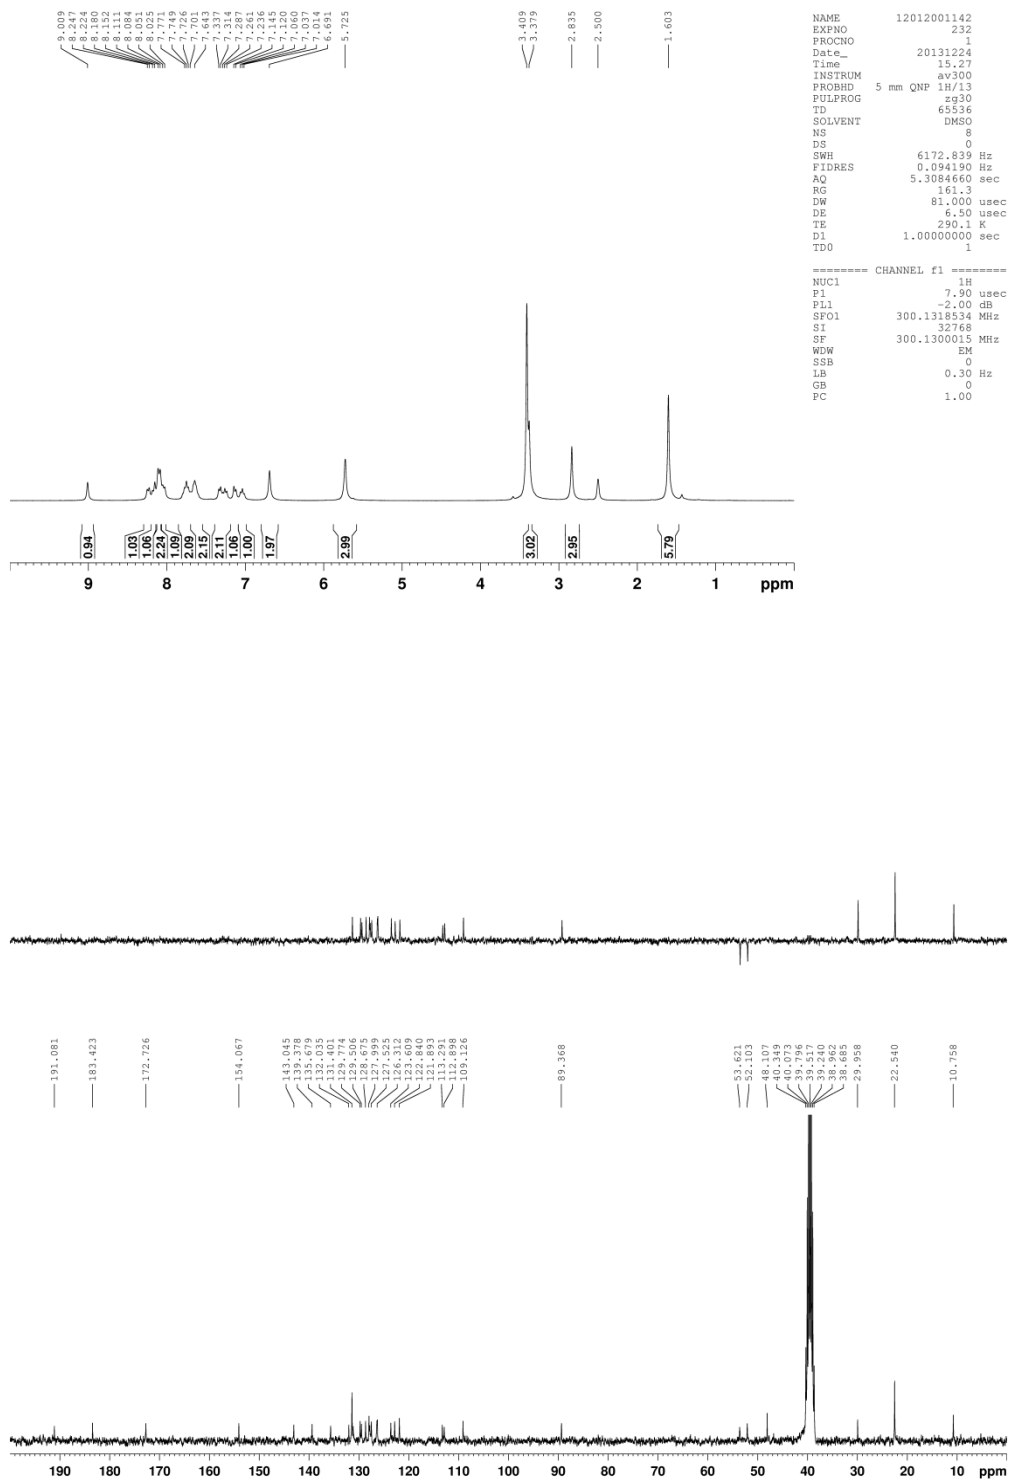

Compound 26

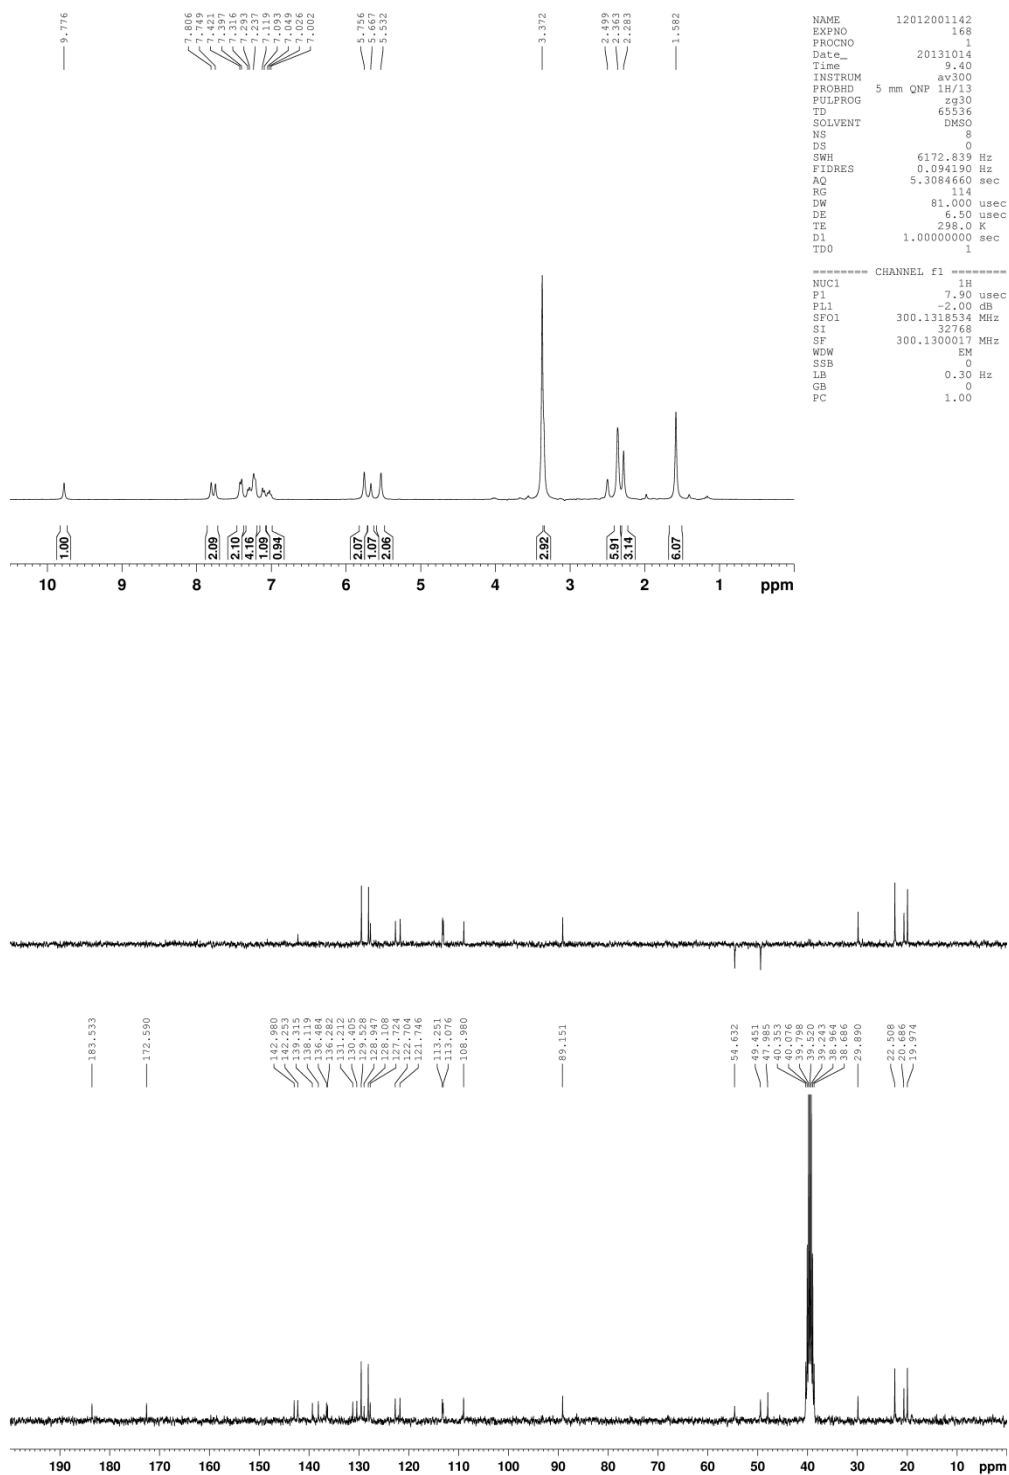

Compound 27

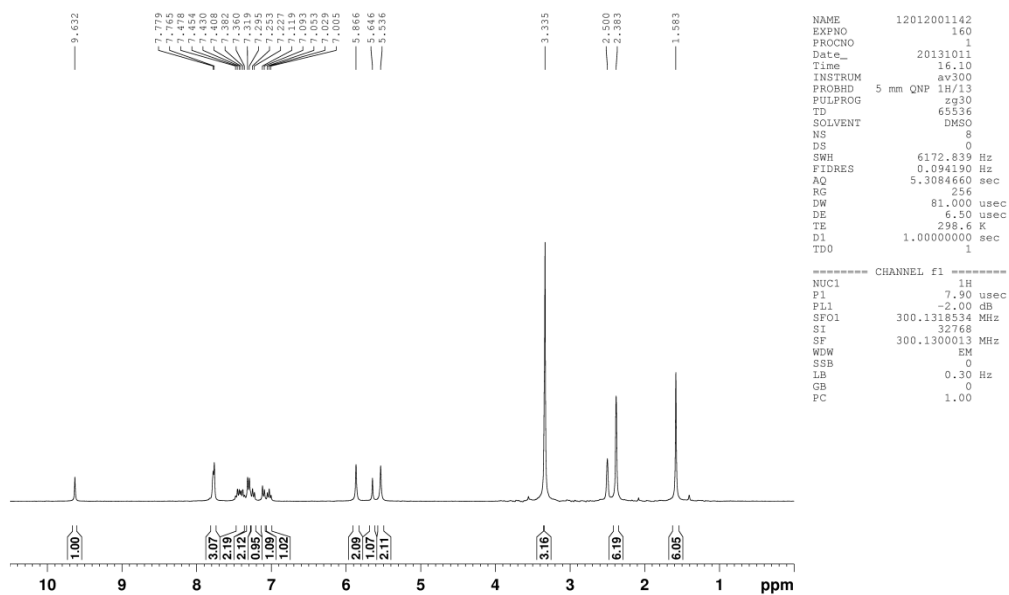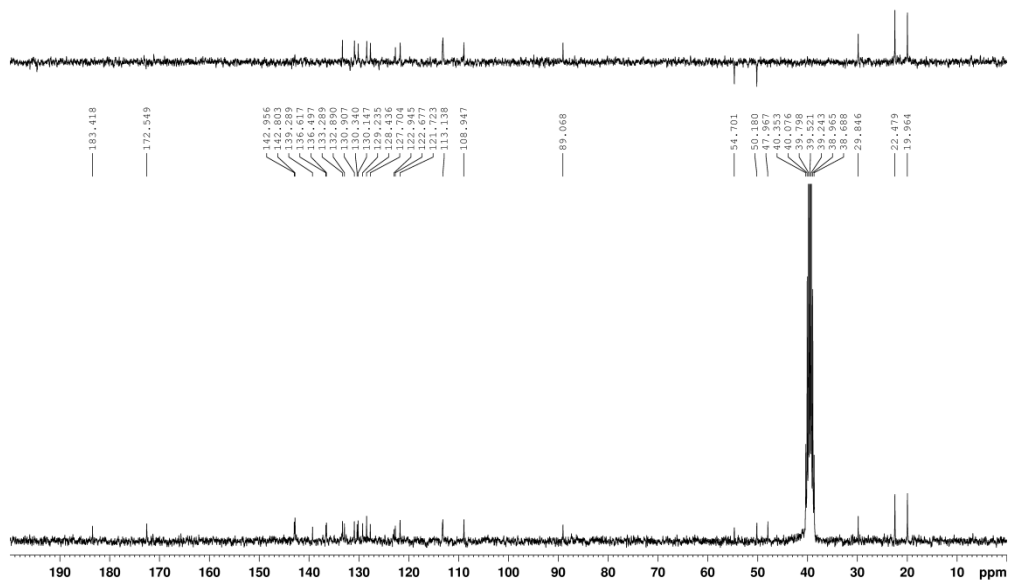

Compound 28

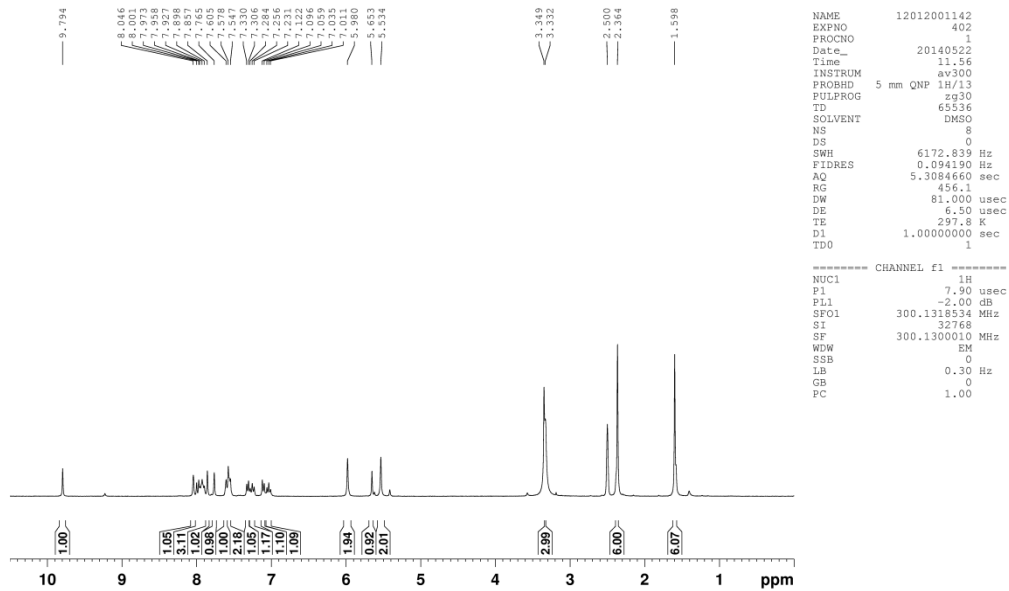

```

NAME      12012001142
EXPNO     402
PROCNO    1
Date_     20140522
Time      11.56
INSTRUM   av300
PROBHD    5 mm QNP 1H/13
PULPROG   zg30
TD         65536
SOLVENT   DMSO
NS         8
DS         0
SWH        6172.839 Hz
FIDRES     0.094190 Hz
AQ         5.3084660 sec
RG         456.1
DW         81.000 usec
DE         6.50 usec
TE         297.8 K
D1         1.00000000 sec
TD0        1
----- CHANNEL f1 -----
NUC1      1H
P1         7.90 usec
PL1        -2.00 dB
SFO1      300.1318534 MHz
SI         32768
SF         300.1300010 MHz
WDW        EM
SSB        0
LB         0.30 Hz
GB         0
PC         1.00

```

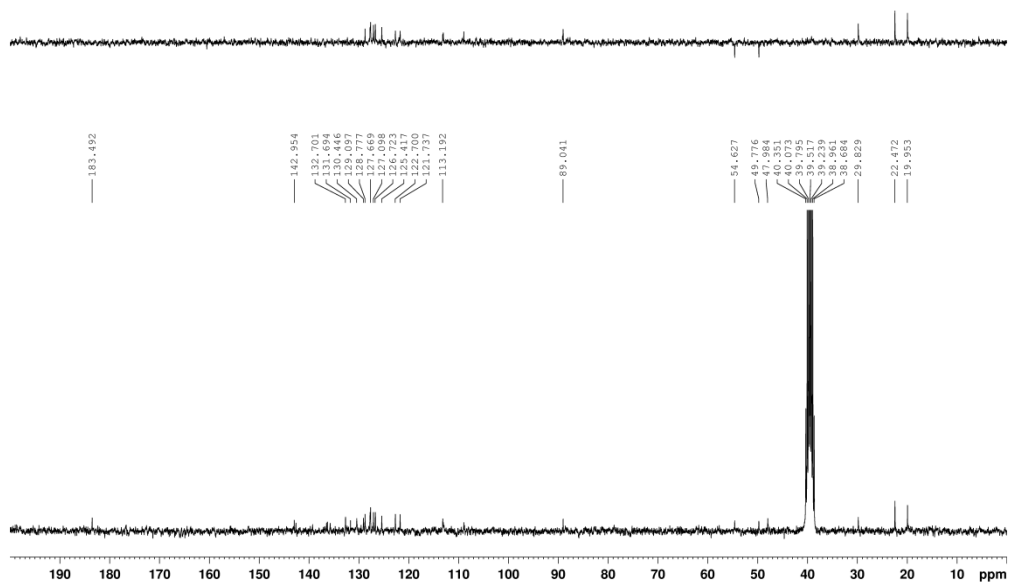

Compound 29



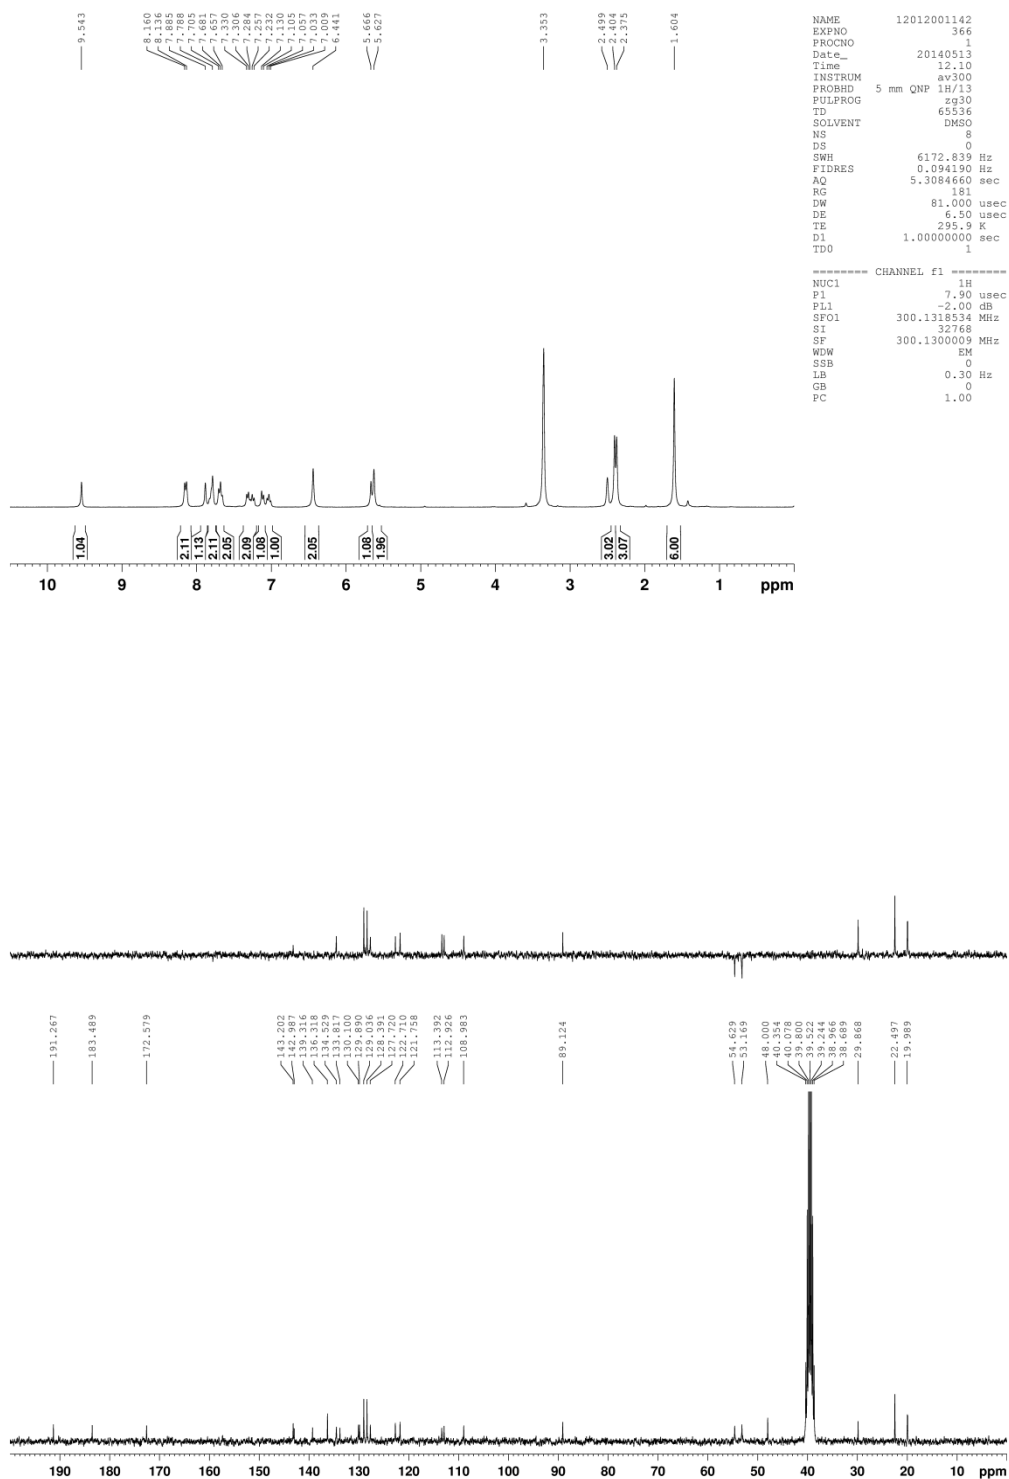

Compound 30

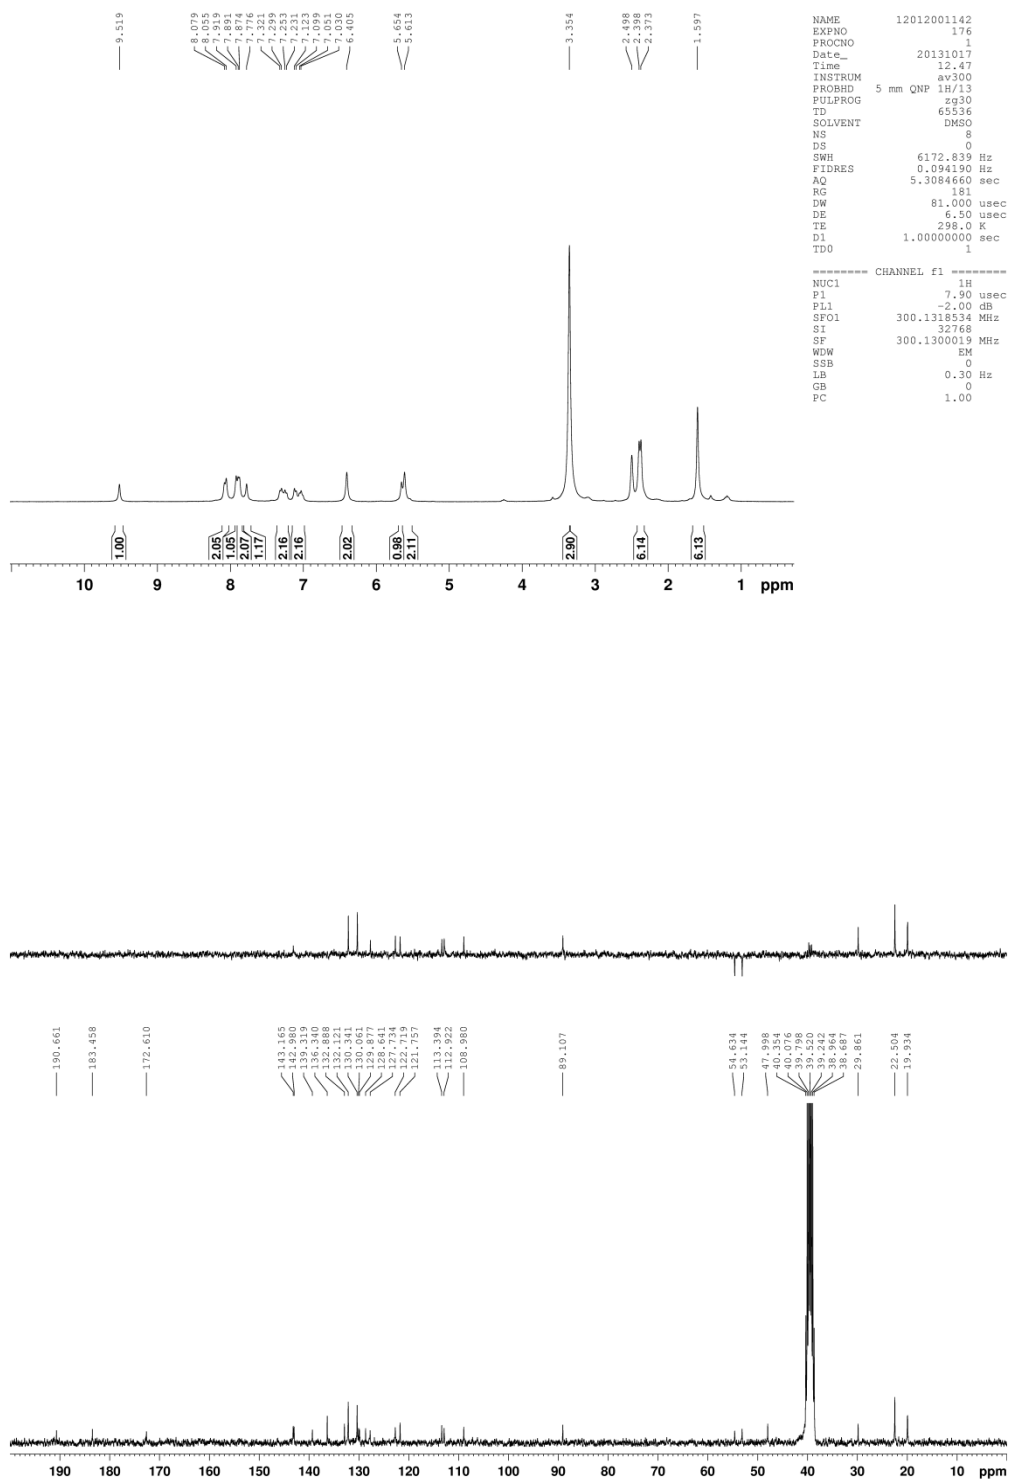

Compound 31

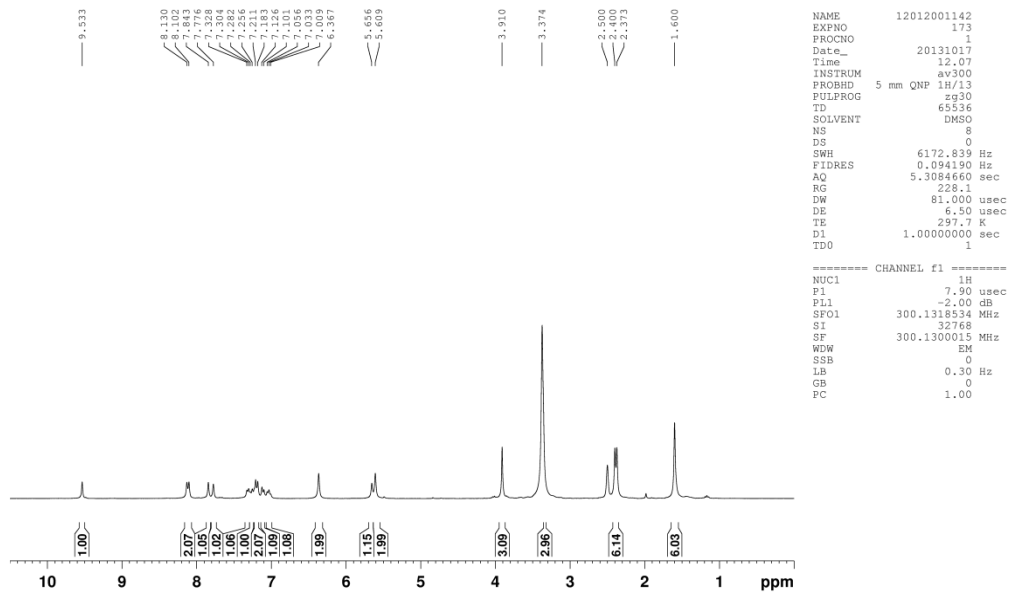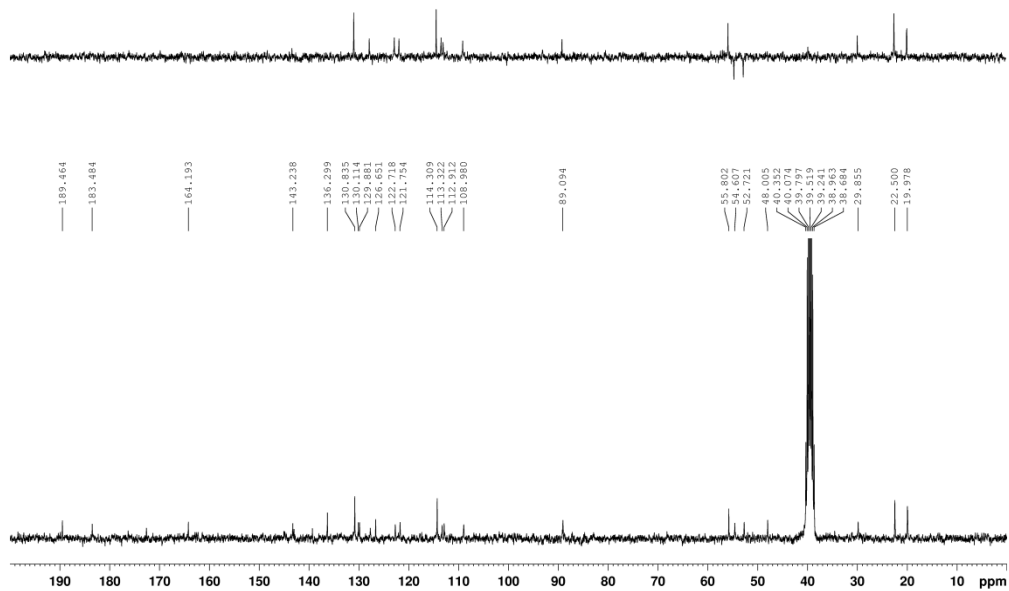

Compound 32

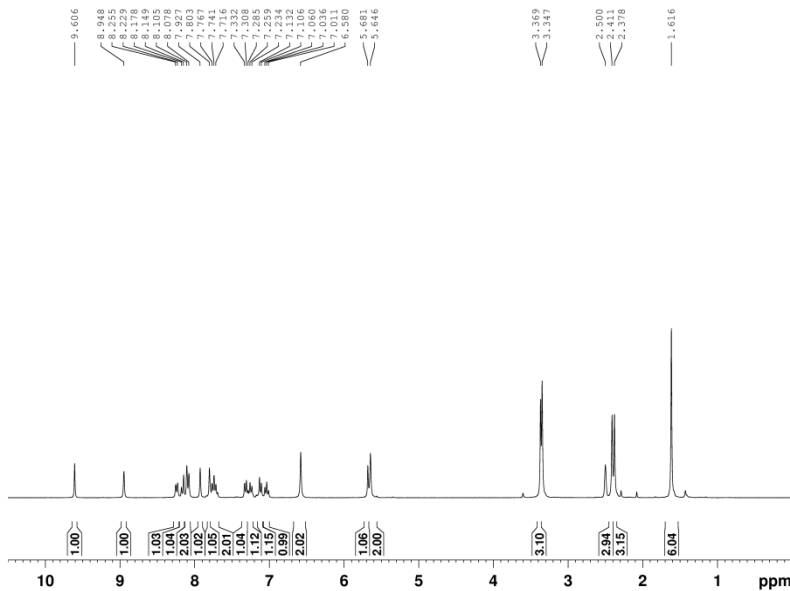

```

NAME      12012001142
EXPNO     391
PROCNO    1
Date_     20140520
Time      12.05
INSTRUM   av300
PROBHD    5 mm QNP 1H/13
PULPROG   zg30
TD         65536
SOLVENT   DMSO
NS         8
DS         0
SWH        6172.839 Hz
FIDRES     0.094190 Hz
AQ         5.3084660 sec
RG         181
DW         81.000 usec
DE         6.50 usec
TE         298.0 K
D1         1.00000000 sec
TD0        1
----- CHANNEL f1 -----
NUC1       1H
P1         7.90 usec
PL1        -2.00 dB
SFO1       300.1318534 MHz
SI         32768
SF         300.1300012 MHz
WDW        EM
SSB        0
LB         0.30 Hz
GB         0
PC         1.00

```

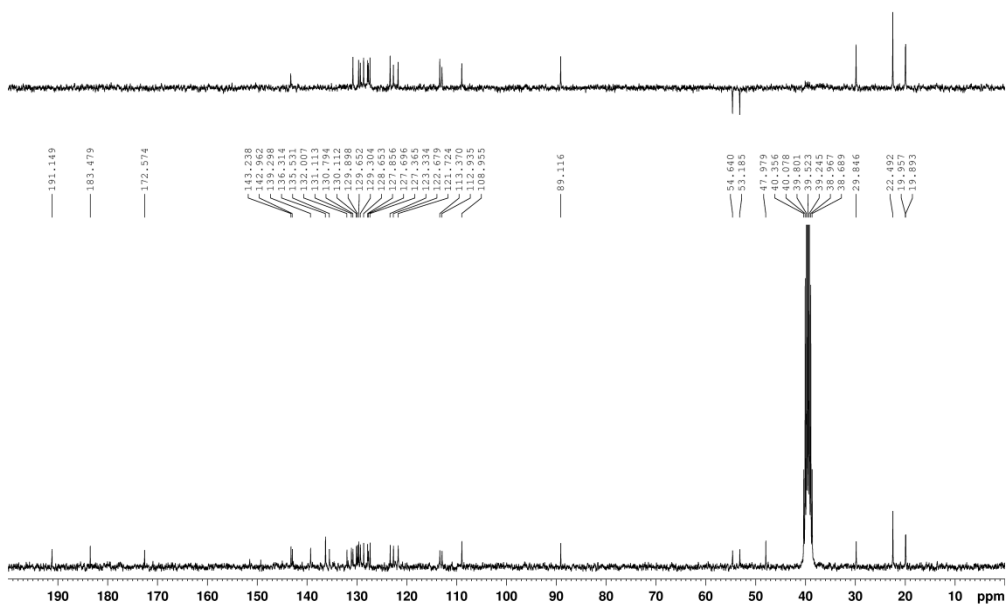

Supplement: c4ob02385d1.pdf [file c4ob02385d1.pdf]
